# Supplementary material for: Synthesis and reactivity of NHC-coordinated phosphinidene oxide
Source: Royal Society of Chemistry journal article supplement (doi:10.1039/d1cc04421d), 2021-01-01
Supplement: d1cc04421d1.pdf [file d1cc04421d1.pdf]

## Electronic Supplementary Information

*for*

### Synthesis and reactivity of NHC-coordinated phosphinidene oxide

Debabrata Dhara,<sup>a</sup> Pradeep Kumar Pal,<sup>b</sup> Ramapada Dolai,<sup>a</sup> Nicolas Chrysochos,<sup>c</sup> Hemant Rawat,<sup>a</sup> Benedict J. Elvers,<sup>c</sup> Ivo Krummenacher,<sup>d</sup> Holger Braunschweig,<sup>\*d</sup> Carola Schulzke,<sup>\*c</sup> Vadapalli Chandrasekhar,<sup>\*a,e</sup> U. Deva Priyakumar,<sup>\*b</sup> and Anukul Jana<sup>\*a</sup>

---

<sup>a</sup> Tata Institute of Fundamental Research Hyderabad  
Gopanpally, Hyderabad-500107  
Telangana, India  
E-mail: ajana@tifrh.res.in

<sup>b</sup> International Institute of Information Technology, Gachibowli, Hyderabad-500032, India  
E-mail: deva@iiit.ac.in

<sup>c</sup> Institut für Biochemie, Universität Greifswald, Felix-Hausdorff-Straße 4, D-17489 Greifswald  
E-mail: carola.schulzke@uni-greifswald.de

<sup>d</sup> Institute of Inorganic Chemistry and Institute for Sustainable Chemistry & Catalysis with Boron (ICB), Julius-Maximilians-Universität Würzburg, Am Hubland, 97074 Würzburg, Germany  
E-mail: h.braunschweig@uni-wuerzburg.de

<sup>e</sup> Department of Chemistry, Indian Institute of Technology Kanpur, Kanpur-208016, India  
E-mail: vc@iitk.ac.in

|   |                                                                  |     |
|---|------------------------------------------------------------------|-----|
| 1 | Content                                                          | S1  |
| 2 | Experimental Details and Analytical Data                         | S2  |
| 3 | Molecular Structures of <b>9</b> , <b>11</b> , and <b>13·DCM</b> | S23 |
| 4 | Crystallographic Details                                         | S25 |
| 5 | EPR Spectroscopy                                                 | S32 |
| 6 | Computational Details                                            | S35 |
| 7 | References                                                       | S83 |

## Experimental Details and Analytical Data

### General considerations

All experiments were carried out under argon or nitrogen atmosphere using standard Schlenk techniques, PL-HE-2GB Innovative Technology GloveBox, and MBraun Unilab GloveBox. Hexane, diethyl ether, THF, and toluene were dried by PS-MD-5 Innovative Technology solvent purification system. Benzene was refluxed over sodium/benzophenone then distilled and stored under argon or nitrogen gas. CH<sub>3</sub>CN was refluxed over CaH<sub>2</sub> and then distilled under vacuum followed by freeze-pump-thaw and eventually stored under argon or nitrogen gas. Compound **1** was prepared according to our reported literature procedure.<sup>S1</sup> N<sub>2</sub>O gas was dried by passing through P<sub>4</sub>O<sub>10</sub> before passed into the reaction mixture. NOSbF<sub>6</sub> was purchased from Sigma Aldrich and used as received. Benzene-d<sub>6</sub>, THF-d<sub>8</sub>, and toluene-d<sub>8</sub> were dried and distilled over potassium under argon or nitrogen. CD<sub>3</sub>CN was dried using CaH<sub>2</sub> and degassed by freeze-pump-thaw cycling. NMR spectra were recorded with a Bruker NanoBay 300 MHz NMR spectrometer. <sup>1</sup>H and <sup>13</sup>C{<sup>1</sup>H} NMR spectra were referenced to the peaks of residual protons of the deuterated solvent (<sup>1</sup>H) or the deuterated solvent itself <sup>13</sup>C{<sup>1</sup>H}. <sup>31</sup>P{<sup>1</sup>H} and <sup>31</sup>P spectra were referenced to the peaks of H<sub>3</sub>PO<sub>4</sub>. <sup>19</sup>F spectrum was referenced to external tol-CF<sub>3</sub>. UV/Vis spectra were acquired using a Jasco V-670 spectrometer using quartz cells with a path length of 0.1 cm. FT-IR spectra were recorded on a Bruker-Alpha spectrometer. Elemental analyses were performed on an Elemental Analyzer from Elementar (Vario Micro Cube). Melting points were determined in closed NMR tubes under argon atmosphere and are reported without correction.

### Synthesis of **2**

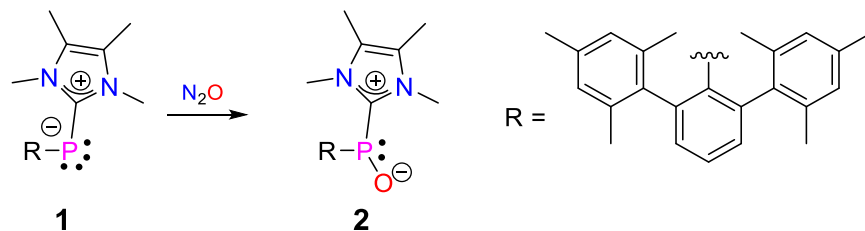

The argon atmosphere of a Schlenk flask containing toluene solution of **1** (0.300 g, 0.640 mmol, in 15 mL of toluene) was exchanged with N<sub>2</sub>O gas using standard Schlenk line technique at room temperature. The reaction mixture was stirred for 10 minutes and an appearance of yellow turbidity was observed. Subsequently, the <sup>31</sup>P NMR spectrum of an aliquot from the reaction

mixture with 2 drops of C<sub>6</sub>D<sub>6</sub> shows complete conversion of **1** into **2**. Then the reaction mixture was evaporated to dryness and washed with hexane to obtain compound **2** as a yellow powder. **Yield:** 0.295 g (95 %). Single crystals suitable for X-ray diffraction were grown from the saturated solution of CH<sub>3</sub>CN. **M.P.:** 145 °C (decomposed). **<sup>1</sup>H NMR (300 MHz, CD<sub>3</sub>CN, 298 K):** δ = 1.88 (s, 6H, CH<sub>3</sub> of Mes), 1.95 (s, 6H, CCH<sub>3</sub>, NHC<sup>Me4</sup> mixed with CD<sub>3</sub>CN residual signal), 2.08 (s, 6H, CH<sub>3</sub> of Mes), 2.27 (s, 6H, CH<sub>3</sub> of Mes), 3.13 (s, 6H, N-CH<sub>3</sub>, NHC<sup>Me4</sup>), 6.74 (s, 2H, Ar-H), 6.85-6.87 (m, 4H, Ar-H), 7.33 (t, <sup>3</sup>J<sub>(<sup>31</sup>P, <sup>1</sup>H)</sub> = 7.5 Hz, 1H, Ar-H) ppm. **<sup>13</sup>C{<sup>1</sup>H} NMR (75.43 MHz, CD<sub>3</sub>CN, 298 K):** δ = 8.5 (2C, CH<sub>3</sub>C, NHC<sup>Me4</sup>), 21.4 (1C, CH<sub>3</sub>-Mes), 21.5 (1C, CH<sub>3</sub>-Mes), 21.7 (2C, CH<sub>3</sub>-Mes), 21.9 (1C, CH<sub>3</sub>-Mes), 22.1 (1C, CH<sub>3</sub>-Mes), 31.8 (2C, N-CH<sub>3</sub>, NHC<sup>Me4</sup>), 128.7 (2C, Ar-CH), 129.2 (2C, Ar-CH), 129.7 (1C, Ar-CH), 129.9 (2C, CH<sub>3</sub>C-CCH<sub>3</sub>, NHC<sup>Me4</sup>), 130.7 (2C, Ar-CH), 136.9 (3C, Ar-C<sub>quat</sub>), 137.2 (2C, Ar-C<sub>quat</sub>), 137.8 (2C, Ar-C<sub>quat</sub>), 140.1 (1C, Ar-C<sub>quat</sub>), 141.7 (2C, Ar-C<sub>quat</sub>), 146.7 (1C, d, <sup>1</sup>J<sub>(<sup>31</sup>P, <sup>13</sup>C)</sub> = 18 Hz, Ar-C<sub>ipso</sub>), 159.0 (1C, d, <sup>1</sup>J<sub>(<sup>31</sup>P, <sup>13</sup>C)</sub> = 113 Hz, N-C-N, NHC<sup>Me4</sup>) ppm. **<sup>31</sup>P NMR (121.5 MHz, CD<sub>3</sub>CN, 298 K):** δ = 89.6 ppm. **IR (KBr, cm<sup>-1</sup>):**  $\bar{\nu}$  (cm<sup>-1</sup>) = 2407 (vw), 1977 (vw), 1782 (vw), 1736 (vw), 1650 (s), 1608 (s), 1565 (s), 1480(s), 1434 (s), 1402 (s), 1370 (m), 1264 (mw), 1232 (m), 1186 (m) 1111 (m), 1083 (m), 1022(vs), 895 (w), 852 (vs), 806 (vs), 724 (vs), 695 (m), 671 (w), 525(s). **UV/Vis (CH<sub>3</sub>CN):** λ<sub>max</sub>(ε) = 329 (6410), 285 (4397) nm (Lmol<sup>-1</sup>cm<sup>-1</sup>). **Elemental Analysis:** Calcd. for (C<sub>31</sub>H<sub>37</sub>N<sub>2</sub>OP): C, 76.83; H, 7.70; N, 5.78; Found: C, 76.82; H, 7.55; N, 5.74.

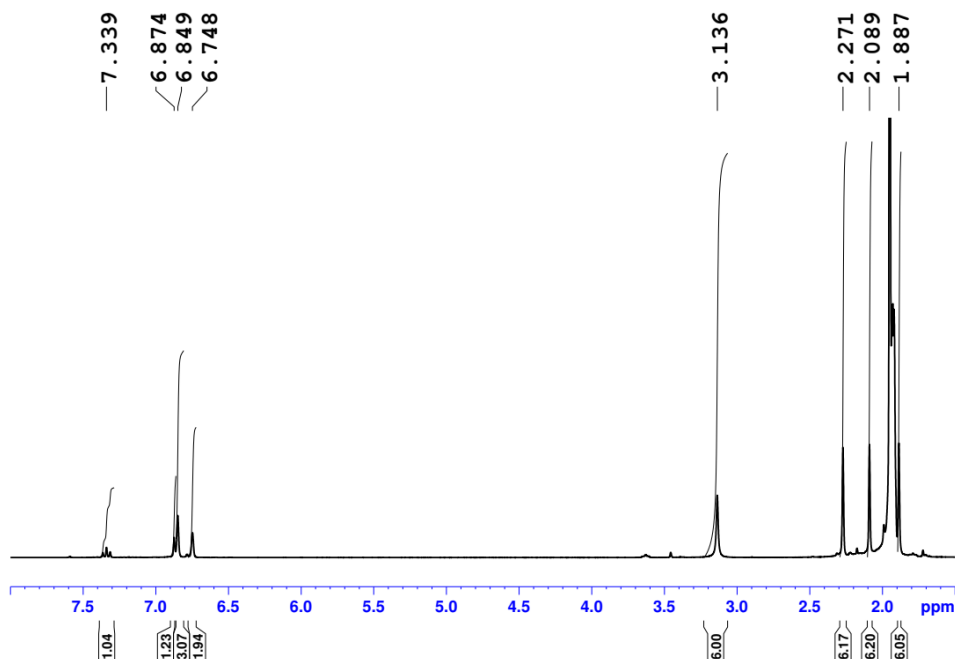

**Fig. S1** <sup>1</sup>H NMR spectrum of **2** in CD<sub>3</sub>CN at RT.

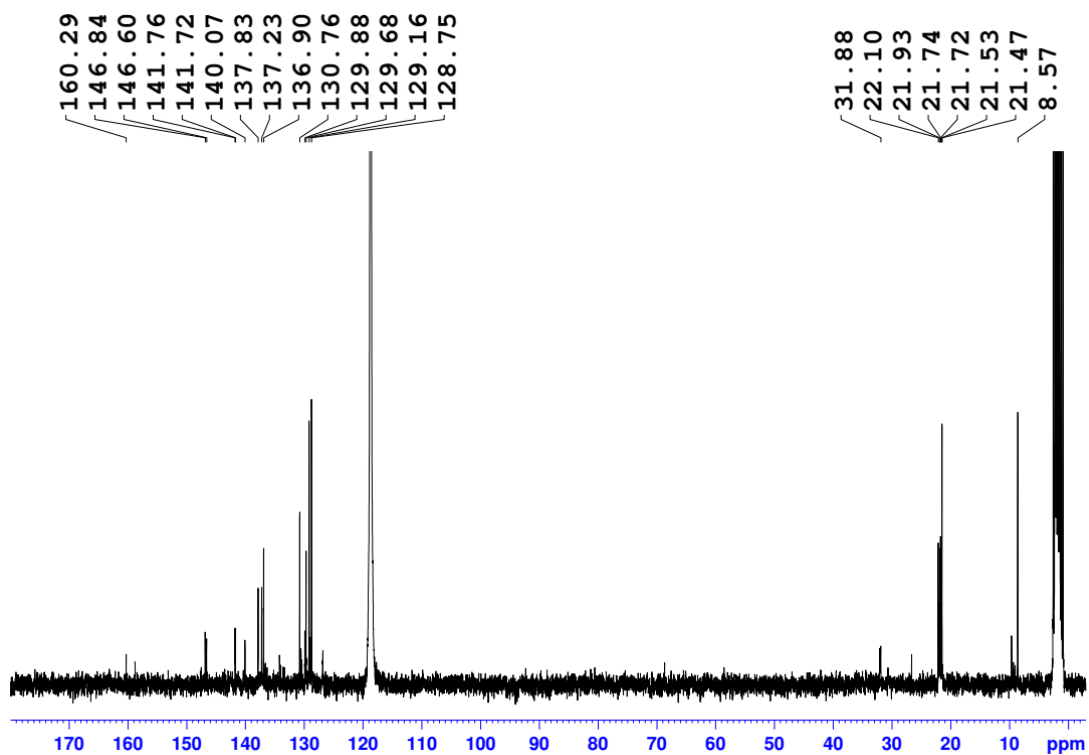

Fig. S2  $^{13}\text{C}\{^1\text{H}\}$  NMR spectrum of **2** in  $\text{CD}_3\text{CN}$  at RT.

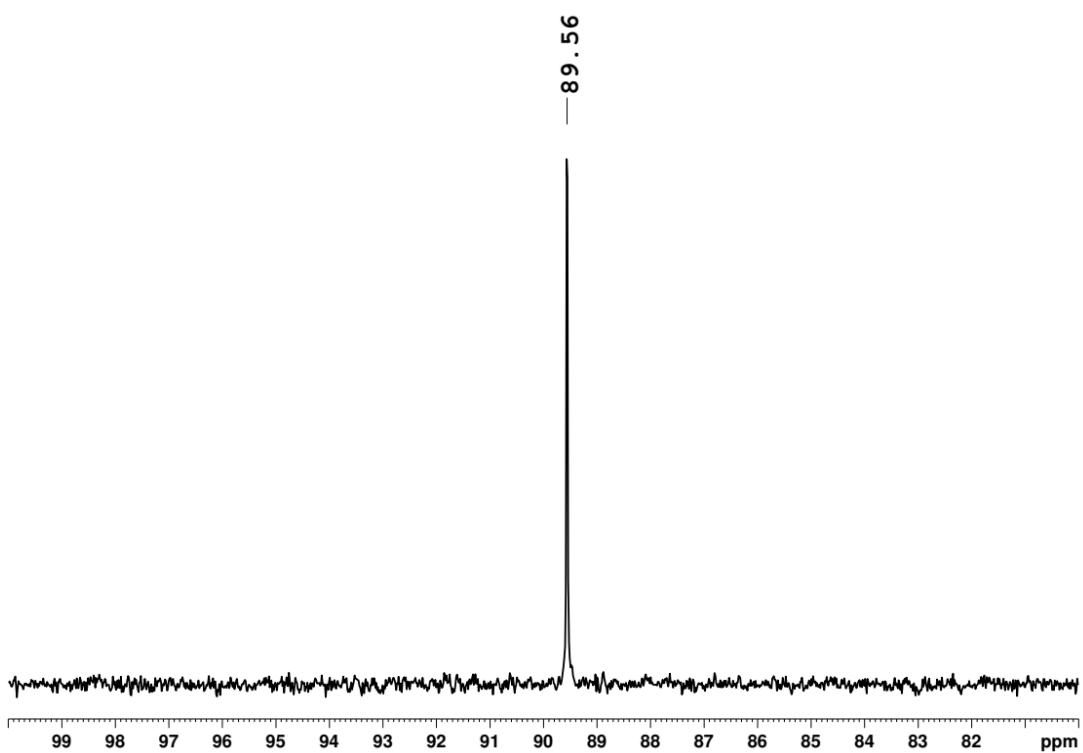

Fig. S3  $^{31}\text{P}$  NMR spectrum of **2** in  $\text{CD}_3\text{CN}$  at RT.

### VT-<sup>31</sup>P NMR study from the synthesis of **2** from **1** and N<sub>2</sub>O

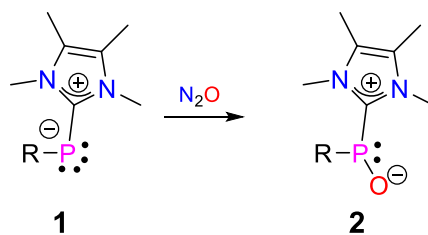

In a NMR tube 0.017 g (0.036 mmol) of compound **1** was taken and dissolved in normal THF (0.4 mL) and into that tube 0.1 mL THF-d<sub>8</sub> was added. The NMR tube was degassed (for removing argon in the tube) by applying the freeze-pump-thaw method and finally filled with N<sub>2</sub>O at -78 °C. Then the NMR was recorded with a precooled probe at -70 °C and slowly brought to room temperature while recording <sup>31</sup>P in 10 °C intervals. The VT NMR shows the formation of only **2** which started already at -70 °C and at room temperature **1** was fully converted to **2**.

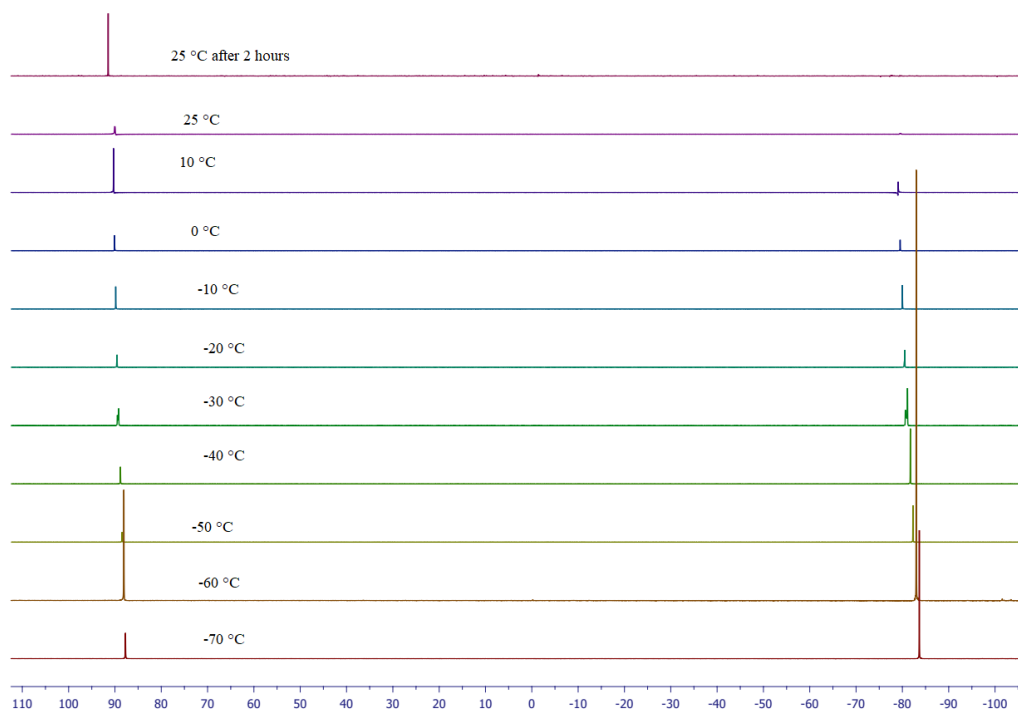

**Fig. S4** VT-<sup>31</sup>P NMR study of **1** with N<sub>2</sub>O in THF/THF-d<sub>8</sub> (4:1).

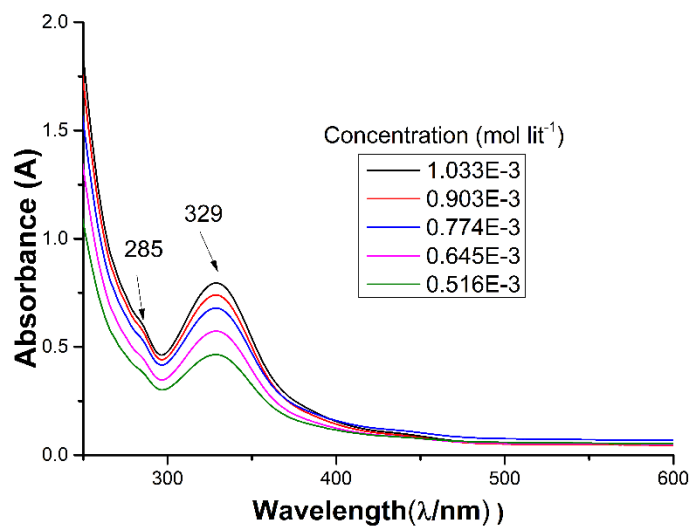

Fig. S5 UV/Vis spectrum of compound **2** in THF at RT.

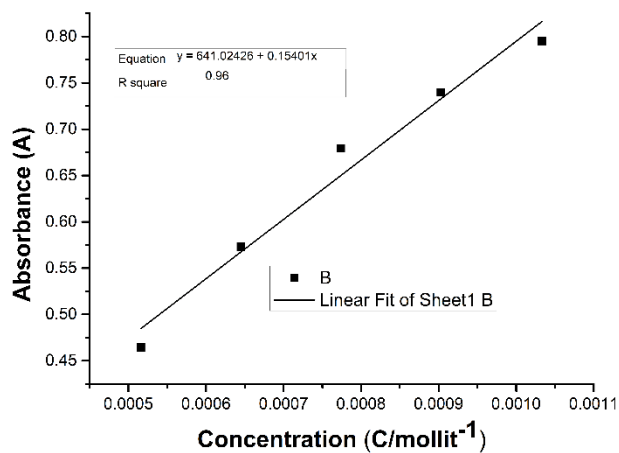

Fig. S6 Linear regression of compound **2** at 329 nm.

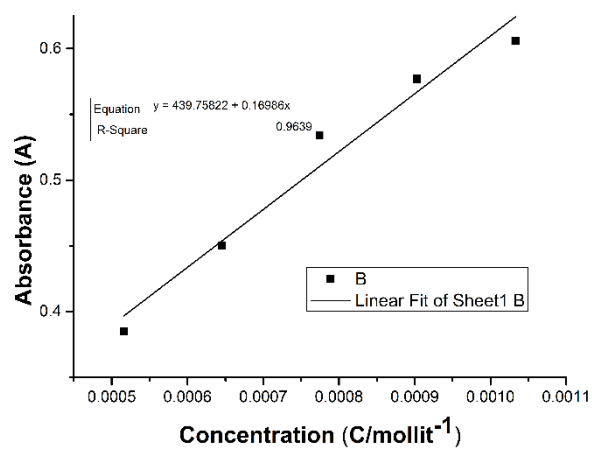

Fig. S7 Linear regression of compound **2** at 285 nm.

## Synthesis of 3

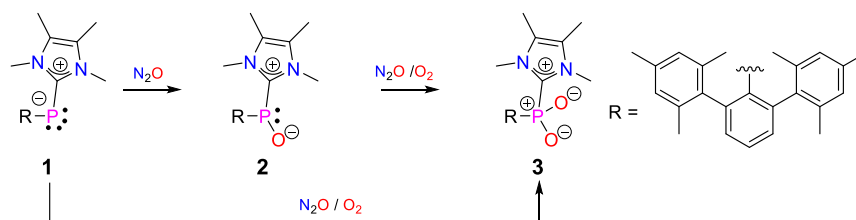

### Path-1: Using **2** and $N_2O$

The Ar atmosphere of a Schlenk flask containing turbid toluene solution of **2** (0.480 g, 99 mmol, in 15 mL of toluene) was exchanged with  $N_2O$  gas using standard Schlenk line technique at room temperature. The reaction mixture was stirred for 2 hrs, during the course of reaction the yellow solution of **1** turned into colourless and the appearance of a white precipitate was observed. Subsequently, the  $^{31}P$  NMR spectrum of an aliquot from the reaction mixture with 2 drops of  $C_6D_6$  shows complete conversion of **2** into **3**. Then the reaction mixture was filtered and residue solid was collected as compound **3** and dried. **Yield:** 0.470 g (95 %).

**Path-2:** Using **2** and  $O_2$  The Ar atmosphere of a Schlenk flask containing turbid toluene solution of **2** (0.200 g, 41 mmol, in 15 mL of toluene) was exchanged with  $O_2$  gas using standard Schlenk line technique at room temperature. The reaction mixture was stirred for 1 hr, during the course of reaction the yellow solution of **1** turned into colourless and the appearance of a white precipitate was observed. Subsequently, the  $^{31}P$  NMR spectrum of an aliquot from the reaction mixture with 2 drops of  $C_6D_6$  shows complete conversion of **2** into **3** quantitatively. Then the reaction mixture was filtered and residue solid was collected as compound **3**.

### Path-3: Using **1** and $N_2O$

The Ar atmosphere of a Schlenk flask containing turbid toluene solution of **1** (0.2 g, 42 mmol, in 15 mL of toluene) was exchanged with  $N_2O$  gas using standard Schlenk line technique at room temperature. The reaction mixture was stirred for 3 hrs, during the course of reaction the yellow solution of **1** turned into colourless and the appearance of a white precipitate was observed. Subsequently, the  $^{31}P$  NMR spectrum of an aliquot from the reaction mixture with 2 drops of  $C_6D_6$  shows complete conversion of **1** into **3**.

**Path-4:** Using **1** and O<sub>2</sub>

The Ar atmosphere of a Schlenk flask containing toluene solution of **1** (0.500 g, 1 mmol, in 15 mL of toluene) was exchanged with O<sub>2</sub> gas using standard Schlenk line technique at room temperature. The reaction mixture was stirred for 1 hour, during the course of reaction the yellow solution of **1** turned into colourless and the appearance of a white precipitate was observed. Subsequently, the <sup>31</sup>P NMR spectrum of an aliquot from the reaction mixture with 2 drops of C<sub>6</sub>D<sub>6</sub> shows complete conversion of **1** into **3**. Then the reaction mixture was filtered and residue solid was collected as compound **3** and dried. **Yield:** 0.525 g (98 %). Single crystals suitable for X-ray diffraction were grown from the saturated solution of CH<sub>3</sub>CN at 0 °C on standing overnight.

**M.P.:** 150 °C, decomposed. **<sup>1</sup>H NMR (300 MHz, CD<sub>3</sub>CN, 298 K):** δ = 2.03 (s, 18H, CH<sub>3</sub> of Mes), 2.32 (s, 6H, CCH<sub>3</sub>, NHC<sup>Me</sup><sub>4</sub>), 3.50 (s, 6H, N-CH<sub>3</sub>, NHC<sup>Me</sup><sub>4</sub>), 6.83 (s, 4H, Ar-H), 6.88-6.92 (m, 2H, Ar-H), 7.45 (t, <sup>3</sup>J<sub>(<sup>1</sup>H,<sup>1</sup>H)</sub> = 7.5 Hz, 1H, Ar-H) ppm. **<sup>13</sup>C{<sup>1</sup>H} NMR (75.43 MHz, CD<sub>3</sub>CN, 298 K):** δ = 9.0 (2C, CH<sub>3</sub>, CCH<sub>3</sub>, NHC<sup>Me</sup><sub>4</sub>), 21.5 (2C, CH<sub>3</sub>-Mes), 21.8 (4C, CH<sub>3</sub>-Mes), 34.4 (2C, N-CH<sub>3</sub>, NHC<sup>Me</sup><sub>4</sub>), 128.2 (2C, CCH<sub>3</sub>, NHC<sup>Me</sup><sub>4</sub>), 129.0 (4C, Ar-CH), 130.8 (1C, Ar-CH), 130.8 (1C, Ar-CH), 31.4 (1C, Ar-CH), 131.5 (1C, Ar-CH), 136.9 (2C, Ar-C<sub>quat</sub>), 137.2 (4C, Ar-C<sub>quat</sub>), 138.5 (1C, Ar-C<sub>quat</sub>), 40.4 (1C, Ar-C<sub>quat</sub>), 141.4 (1C, Ar-C<sub>quat</sub>), 141.4 (1C, Ar-C<sub>quat</sub>), 145.3 (1C, d, <sup>1</sup>J<sub>(<sup>31</sup>P,<sup>13</sup>C)</sub> = 9.7 Hz), 147.3 (1C, d, <sup>1</sup>J<sub>(<sup>31</sup>P,<sup>13</sup>C)</sub> = 105 Hz, N-C-N, NHC<sup>Me</sup><sub>4</sub>) ppm. **<sup>31</sup>P NMR (121.5 MHz, CD<sub>3</sub>CN, 298 K):** δ = -0.8 ppm. **IR (KBr, cm<sup>-1</sup>):**  $\bar{\nu}$  (cm<sup>-1</sup>) = 2737 (w), 2409 (vw), 1969 (w), 1730 (vw), 1645 (mw), 1566 (m), 1459 (vs), 1366 (w), 1260 (s), 1233 (s), 1184 (m), 1131 (s), 1077 (s), 1042 (s), 859 (m), 847 (vs), 816 (s), 758 (vs), 723 (s), 598 (s), 562 (vs). **Elemental Analysis:** Calcd. for (C<sub>31</sub>H<sub>37</sub>N<sub>2</sub>O<sub>2</sub>P): C, 74.38; H, 7.45; N, 5.60; Found: C, 74.40; H, 7.38; N, 5.60.



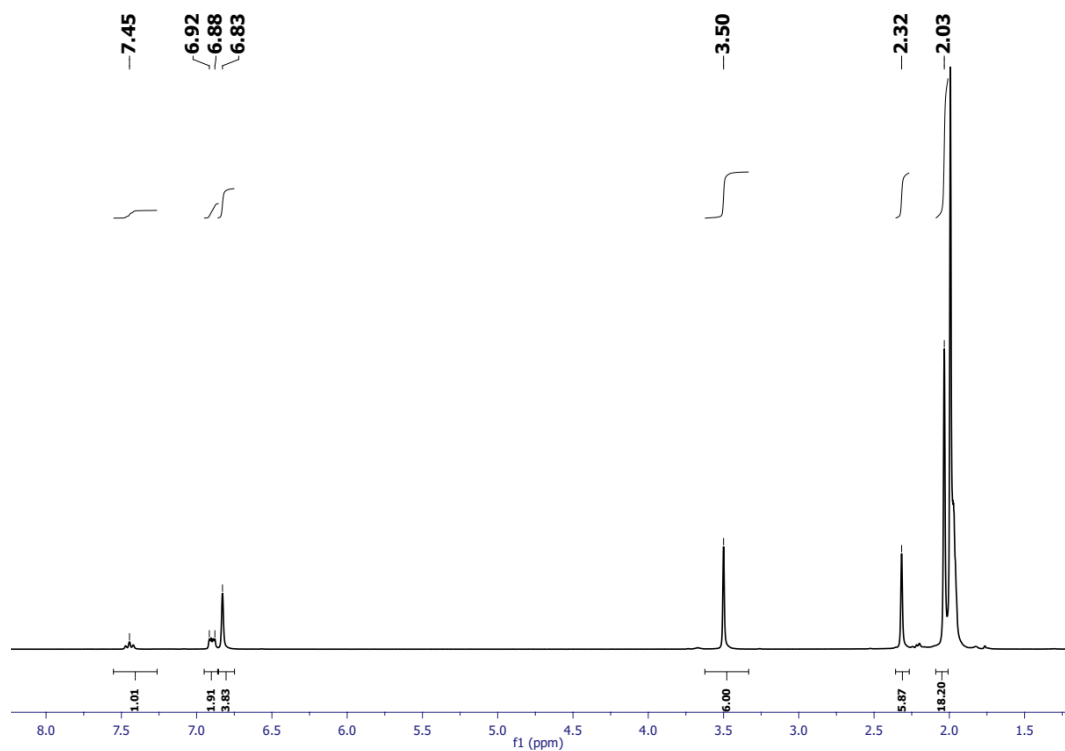

Fig. S8  $^1\text{H}$  NMR spectrum of **3** in  $\text{CD}_3\text{CN}$  at RT.

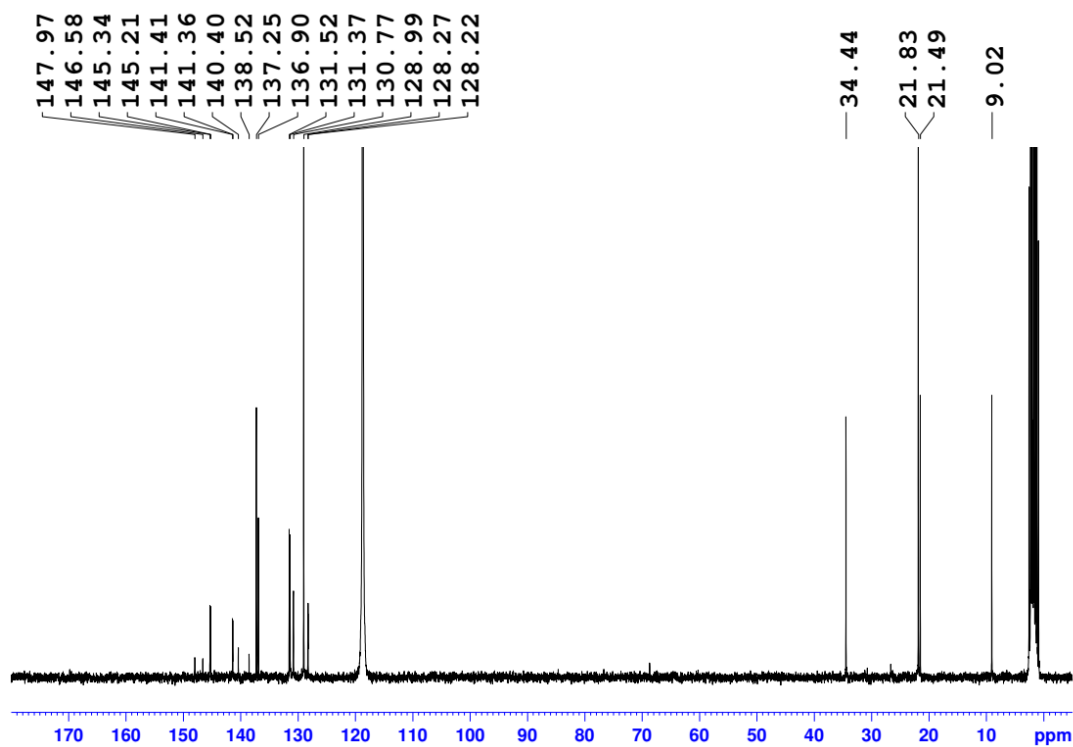

Fig. S9  $^{13}\text{C}\{^1\text{H}\}$  NMR spectrum of **3** in  $\text{CD}_3\text{CN}$  at RT.

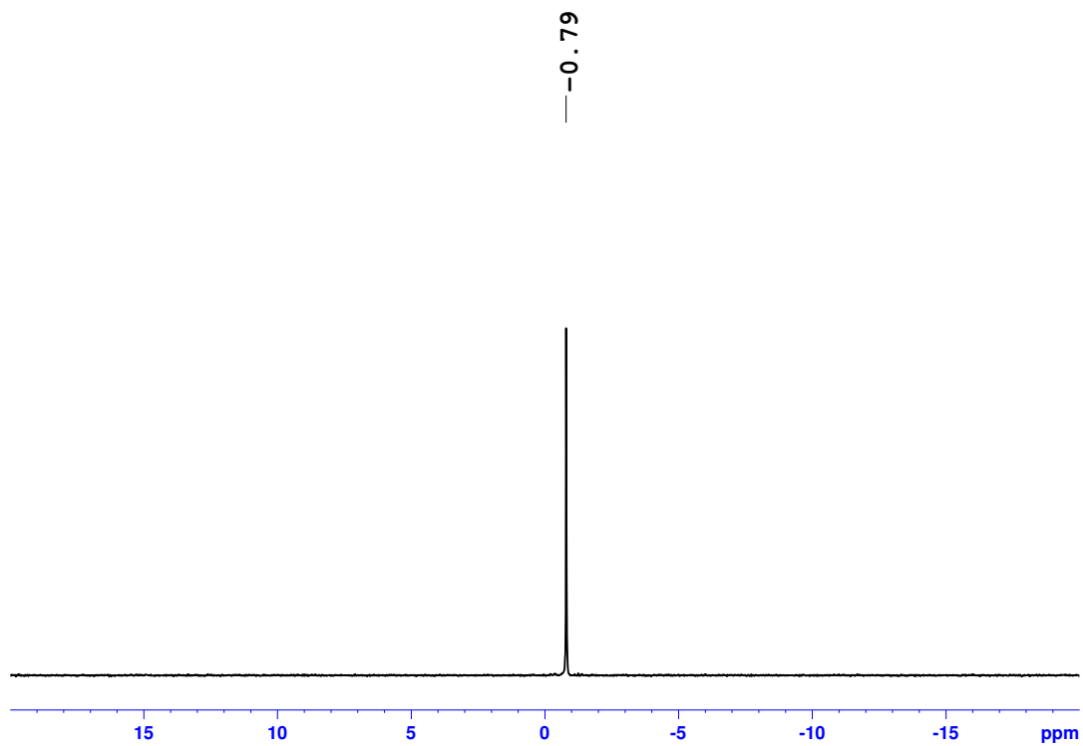

**Fig. S10**  $^{31}\text{P}$  NMR spectrum of **3** in  $\text{CD}_3\text{CN}$  at RT.

## VT NMR of **1** with O<sub>2</sub>

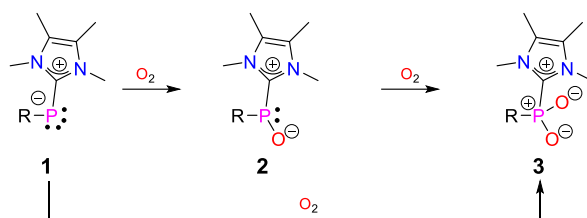

In a NMR tube 0.020 g (0.042 mmol) of compound **1** was taken and dissolved in normal THF (0.4 mL) and into that tube 0.1 mL THF-D<sub>8</sub> was added. The NMR tube was degassed (for removing argon in the tube) by applying the Freeze-pump-thaw method and finally filled with O<sub>2</sub> at -78 °C. Then the NMR was recorded with a precooled probe at -70 °C and slowly brought to room temperature while recording <sup>31</sup>P spectra in 10 °C intervals. The VT NMR shows the formation of **3** started already at -70 °C. At that temperature am signal for compound **2** was also observed. Up to room temperature signals for both **2**, and **3** are present. This suggests that the formation of **3** occurs stepwise through the formation of **2**.

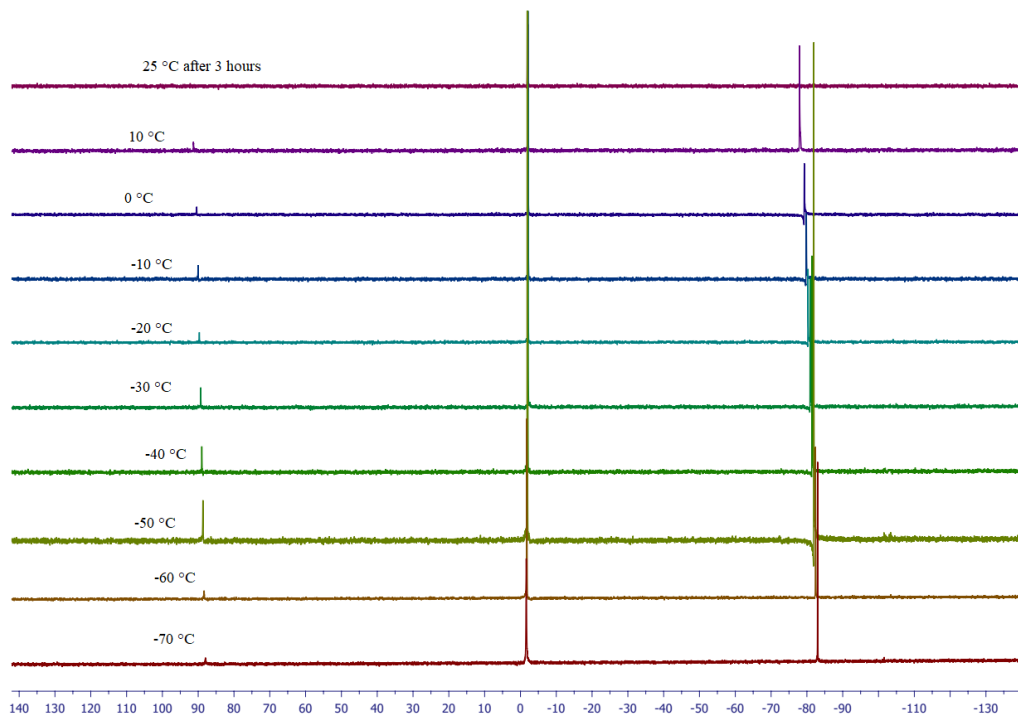

**Fig. S11** Variable temperatures <sup>31</sup>P NMR of **1** with O<sub>2</sub> in THF/THF-D<sub>8</sub>.

## Synthesis of 6

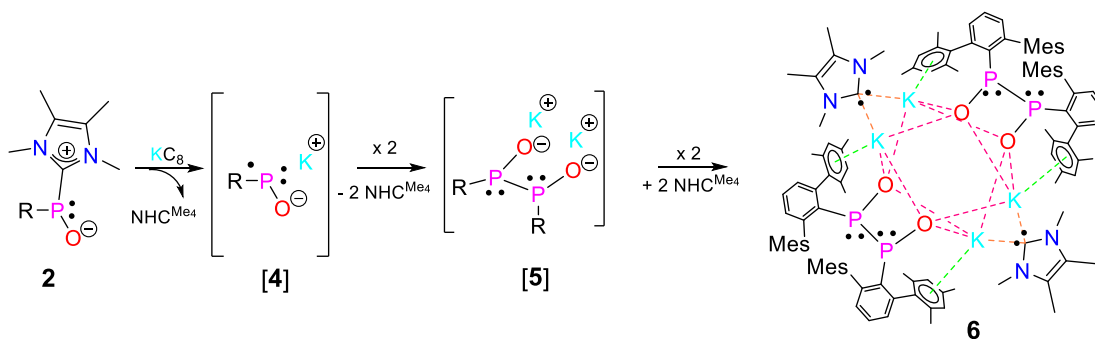

10 mL of  $\text{C}_6\text{H}_6$  was added to a Schlenk flask containing 0.250 g (0.515 mmol) of **2** and 0.091 g (0.670 mmol) of  $\text{KC}_8$  at 0 °C. Then the reaction mixture was slowly brought to room temperature over 6 hrs and the resulting red coloured reaction mixture was filtered. Then the obtained filtrate was concentrated to about 5 mL and dark red crystals of **6** were obtained by a slow diffusion of hexane onto the solution over two days at room temperature. **Yield:** 0.087g (25-35 %). Compound **6** is very much air and moisture sensitive and not stable in solution which hindered us to get any further analytical or spectroscopic data.

## Synthesis of 9

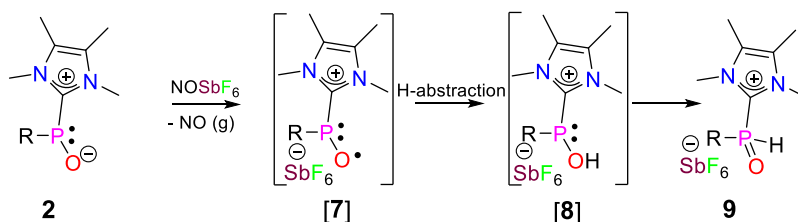

20 mL of  $\text{CH}_3\text{CN}$  was added to a Schlenk flask containing 0.290 g (0.598 mmol) of **2** and 0.159 g (0.598 mmol) of  $\text{NOSbF}_6$  at  $-78^\circ\text{C}$ . The reaction mixture was then slowly brought to room temperature over 3 hrs. The yellow colour of the solution became light brown around  $-30$  to  $-20^\circ\text{C}$  to colourless around  $0^\circ\text{C}$ . Subsequently, the  $^{31}\text{P}$  NMR spectrum of an aliquot from the reaction mixture with 2 drops of  $\text{C}_6\text{D}_6$  showed complete consumption of **2**. After that all the volatiles were removed under vacuum. The resulting colourless solid was washed with hexane to isolate pure compound **9** as solid powder. Single crystals suitable for X-ray diffraction study were obtained from its saturated solution in  $\text{CH}_3\text{CN}$  on standing overnight at room temperature. **Yield:** 0.400 g (92 %). **M.P.:**  $>180^\circ\text{C}$ .  **$^1\text{H}$  NMR (300 MHz,  $\text{CD}_3\text{CN}$ , 298 K):**  $\delta$  = 1.87 (s, 6H,  $\text{CH}_3$  of Mes), 2.11 (s, 6H,  $\text{CH}_3$  of Mes), 2.16 (s, 6H,  $\text{CCH}_3$ ,  $\text{NHC}^{\text{Me}_4}$ ), 2.35 (s, 6H,  $\text{CH}_3$  of Mes), 3.29, (s, 6H,  $\text{N-CH}_3$ ,  $\text{NHC}^{\text{Me}_4}$ ), 6.71 (s, 2H, Ar-H), 6.91 (s, 2H, Ar-H), 7.35-7.39 (m, 2H, Ar-H), 7.91 (t,  $^3J_{(1\text{H}, 1\text{H})} = 7.5$  Hz, 1H, Ar-H), 7.62 (d,  $^1J_{(31\text{P}, 1\text{H})} = 547$  Hz, 1H, P-H) ppm.  **$^{13}\text{C}\{^1\text{H}\}$  NMR (75.43 MHz,  $\text{CD}_3\text{CN}$ , 298 K):**  $\delta$  = 9.2 (2C,  $\text{CH}_3$ ,  $\text{CH}_3\text{C-CCH}_3$ ,  $\text{NHC}^{\text{Me}_4}$ ), 21.3 (2C,  $\text{CH}_3$ -Mes), 21.5 (2C,  $\text{CH}_3$ -Mes), 21.7 (2C,  $\text{CH}_3$ -Mes), 34.4 (2C,  $\text{N-CH}_3$ ,  $\text{NHC}^{\text{Me}_4}$ ), 127.8 (1C,  $\text{CH}_3\text{C-CCH}_3$ ,  $\text{NHC}^{\text{Me}_4}$ ), 128.0 (1C,  $\text{CH}_3\text{C-CCH}_3$ ,  $\text{NHC}^{\text{Me}_4}$ ), 129.8 (2C, Ar-CH), 130.4 (2C, Ar-CH), 132.4 (1C, Ar-CH), 132.6 (2C, Ar-CH), 135.7 (1C, Ar- $\text{C}_{\text{quat}}$ ), 135.8 (1C, Ar- $\text{C}_{\text{quat}}$ ), 136.4 (1C, Ar- $\text{C}_{\text{quat}}$ ), 136.4 (1C, Ar- $\text{C}_{\text{quat}}$ ), 138.0 (2C, Ar- $\text{C}_{\text{quat}}$ ), 138.0 (2C, Ar- $\text{C}_{\text{quat}}$ ), 140.1 (3C, Ar- $\text{C}_{\text{quat}}$ ), 147.5 (d,  $^1J_{(31\text{P}, 13\text{C})} = 12.7$  Hz, N-C-N of  $\text{NHC}^{\text{Me}_4}$ ) ppm.  **$^{31}\text{P}$  NMR (121.5 MHz,  $\text{CD}_3\text{CN}$ , 298 K):**  $\delta$  =  $-7.0$  (d,  $^1J_{(31\text{P}, 1\text{H})} = 547$  Hz) ppm.  **$^{31}\text{P}\{^1\text{H}\}$  NMR (121.5 MHz,  $\text{CD}_3\text{CN}$ , 298 K):**  $\delta$  =  $-7.0$  (s) ppm.  **$^{19}\text{F}$  NMR (282.4 MHz,  $\text{CH}_3\text{CN}$ , 298 K):**  $\delta$  =  $-124.0$  [m, 6F, (sex,  $^1J_{(121\text{Sb}, 19\text{F})} = 1930$  Hz, oct,  $^1J_{(123\text{Sb}, 19\text{F})} = 1056$  Hz.)] ppm. **IR (KBr,  $\text{cm}^{-1}$ ):**  $\bar{\nu}$  ( $\text{cm}^{-1}$ ) = 2971 (s), 2961 (s), 2854 (m), 2361(m, P-H), 1637 (mw), 1604 (mw), 1567 (m), 1456 (vs), 1376 (s), 1261 (m), 1116 (m), 985 (w), 937 (s), 851 (s), 814 (s), 773 (w), 657 (s), 519 (m). **Elemental Analysis:** Calcd. for  $(\text{C}_{31}\text{H}_{38}\text{N}_2\text{OPSbF}_6)$ : C, 51.61; H, 5.31; N, 3.88; Found: C, 49.67; H, 5.17; N 3.74 (the deviation of the elemental analysis result is most likely due to the presence of very minor amount of unassigned impurity, which can be seen in the  $^1\text{H}$  NMR spectrum).

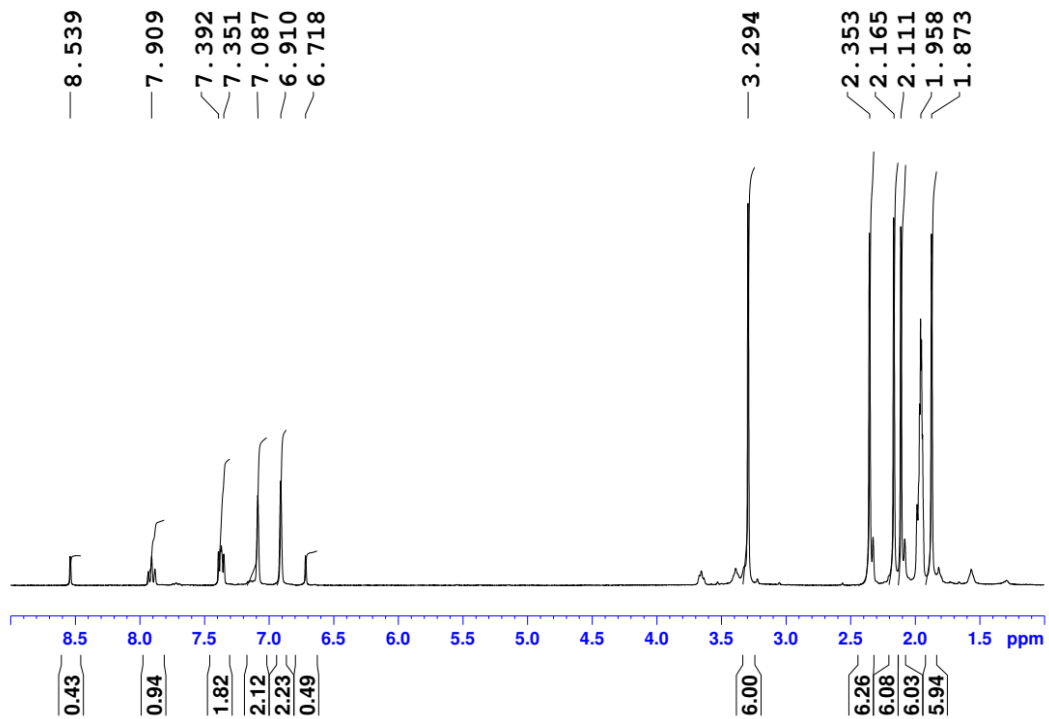

Fig. 12  $^1\text{H}$  NMR spectrum of **9** in  $\text{CD}_3\text{CN}$  at RT.

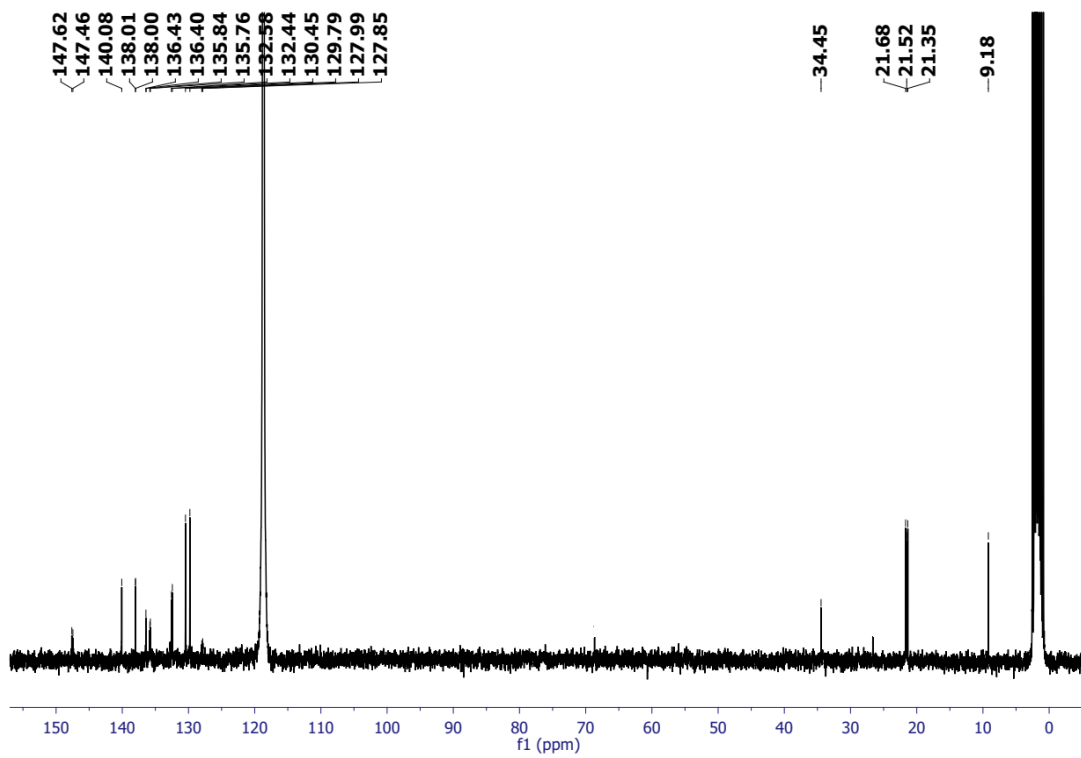

Fig. S13  $^{13}\text{C}\{^1\text{H}\}$  NMR spectrum of **9** in  $\text{CD}_3\text{CN}$  at RT.

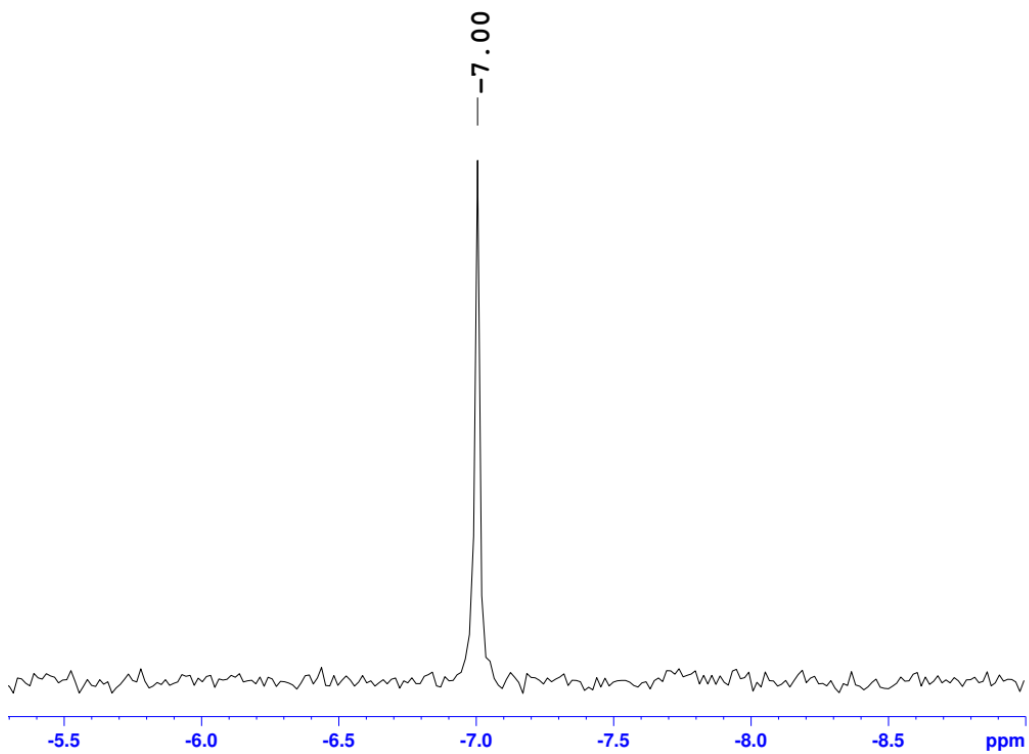

**Fig. S14**  $^{31}\text{P}\{^1\text{H}\}$  NMR spectrum of **9** in  $\text{CD}_3\text{CN}$  at RT.

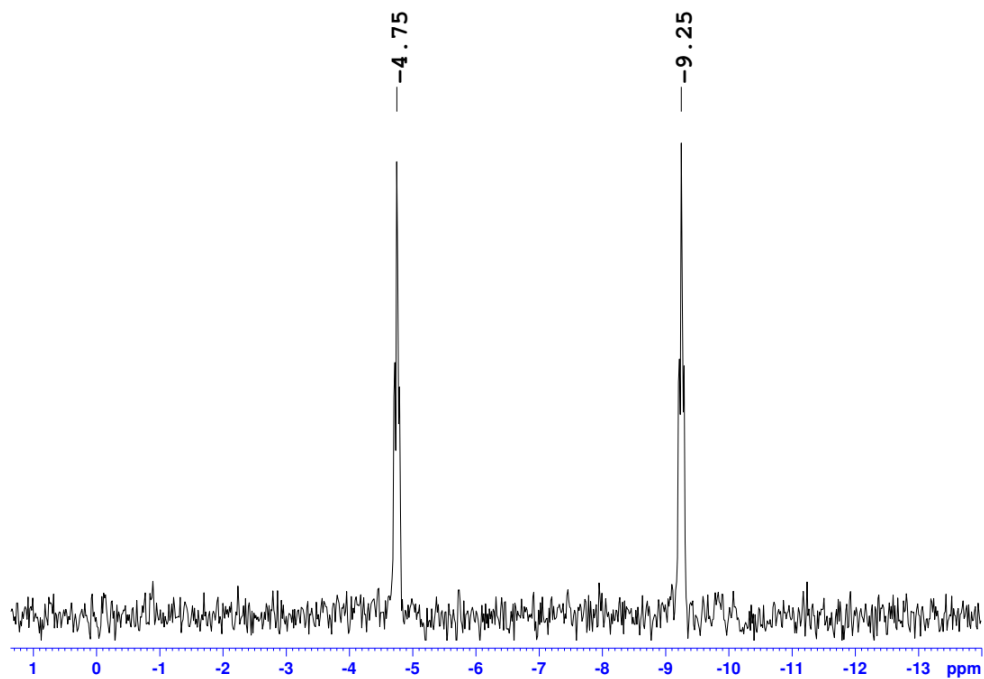

**Fig. S15**  $^{31}\text{P}$  NMR spectrum of **9** in  $\text{CD}_3\text{CN}$  at RT.

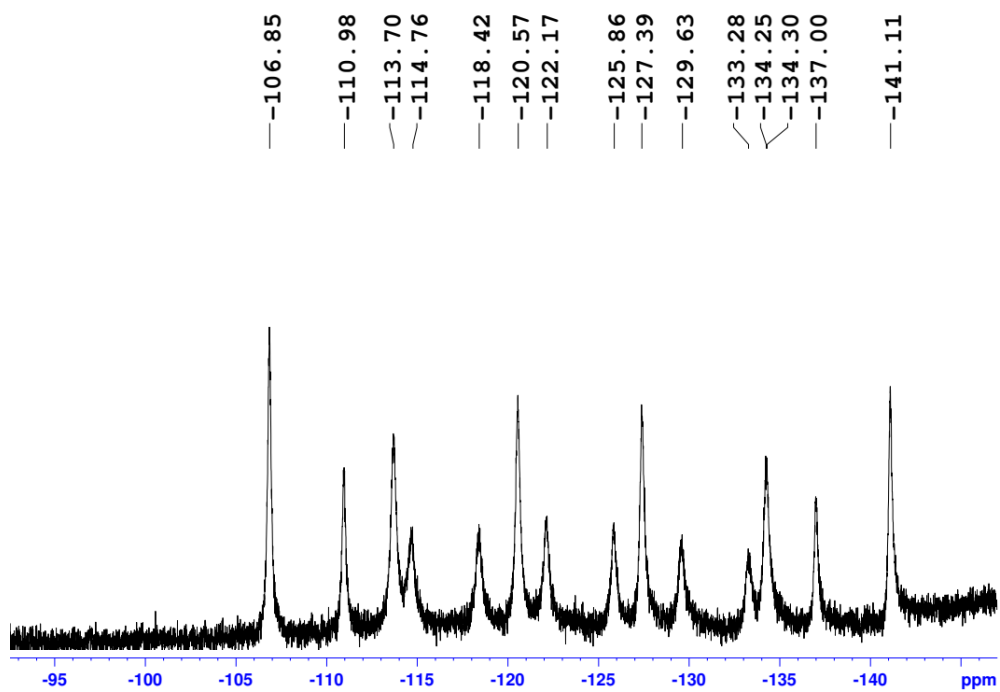

**Fig. S16**  $^{19}\text{F}$  NMR spectrum of **9** in  $\text{CD}_3\text{CN}$  at RT.



## Synthesis of 11

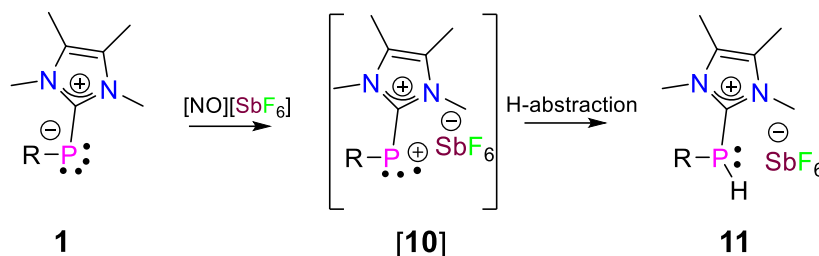

15 mL of CH<sub>3</sub>CN was added to a Schlenk flask containing 0.350 g (0.746 mmol) of **1** and 0.198 g (0.746 mmol) of NOSbF<sub>6</sub> at -78 °C. The reaction mixture was then slowly brought to room temperature over 3 hrs. The orange solution become light brown to colourless again. Subsequently, the <sup>31</sup>P NMR spectrum of an aliquot from the reaction mixture with 2 drops of C<sub>6</sub>D<sub>6</sub> shows complete consumption of **1**. After that all the volatilities were removed under vacuum. The resulting colourless solid was washed with hexane and a white solid was obtained which consists mostly of compound **11** along with a small amount of unidentified impurity as revealed by <sup>31</sup>P NMR data. Single crystals suitable for a X-ray diffraction study of **11** were obtained from its saturated solution in CH<sub>3</sub>CN upon standing overnight at room temperature. We were unable to fully purify compound **11** not even after repeated re-crystallization. As a result, we cannot report the <sup>13</sup>C{<sup>1</sup>H} NMR data here and in the <sup>1</sup>H, <sup>31</sup>P{<sup>1</sup>H}, and <sup>31</sup>P NMR spectra some unidentified resonances remain. **Yield:** 0.490 g (93 %). **<sup>1</sup>H NMR (300 MHz, CD<sub>3</sub>CN, 298 K):** δ = 1.86 (s, 6H, CH<sub>3</sub> of Mes), 2.10 (s, 6H, CH<sub>3</sub>, CH<sub>3</sub>C-CCH<sub>3</sub>, NHC<sup>Me4</sup>), 2.18 (s, 6H, CH<sub>3</sub> of Mes), 2.35 (s, 6H, CH<sub>3</sub> of Mes), 3.23 (s, 6H, N-CH<sub>3</sub> of NHC<sup>Me4</sup>), 4.72 (d, <sup>1</sup>J(<sub>31P, 1H</sub>) = 260 Hz, 1H, P-H), 6.91 (s, 2H, Ar-H), 7.09 (s, 2H, Ar-H), 7.19-7.23 (m, 2H, Ar-H), 7.6-7.7 (m, 1H, Ar-H) ppm. **<sup>31</sup>P{<sup>1</sup>H} NMR (121.5 MHz, CD<sub>3</sub>CN, 298 K):** δ = -103.6 ppm. **<sup>31</sup>P NMR (121.5 MHz, CD<sub>3</sub>CN, 298 K):** δ = -103.6 (d, <sup>1</sup>J(<sub>31P, 1H</sub>) = 260 Hz., P-H) ppm. **<sup>19</sup>F NMR (282.4 MHz, CD<sub>3</sub>CN, 298 K):** -123.97 (m, 6F, (sex, <sup>1</sup>J(<sub>121Sb, 19F</sub>) = 1942 Hz & oct, <sup>1</sup>J(<sub>123Sb, 19F</sub>) = 1032 Hz.)) ppm.

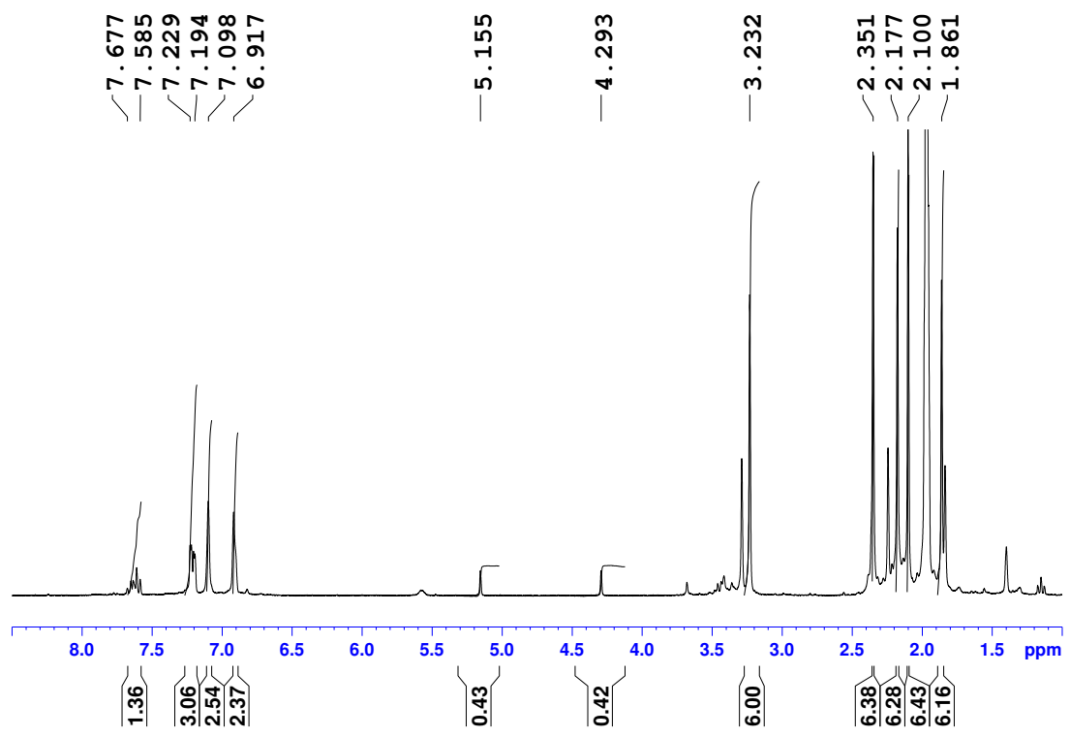

Fig. 17  $^1\text{H}$  NMR spectrum of **11** in  $\text{CD}_3\text{CN}$  at RT.

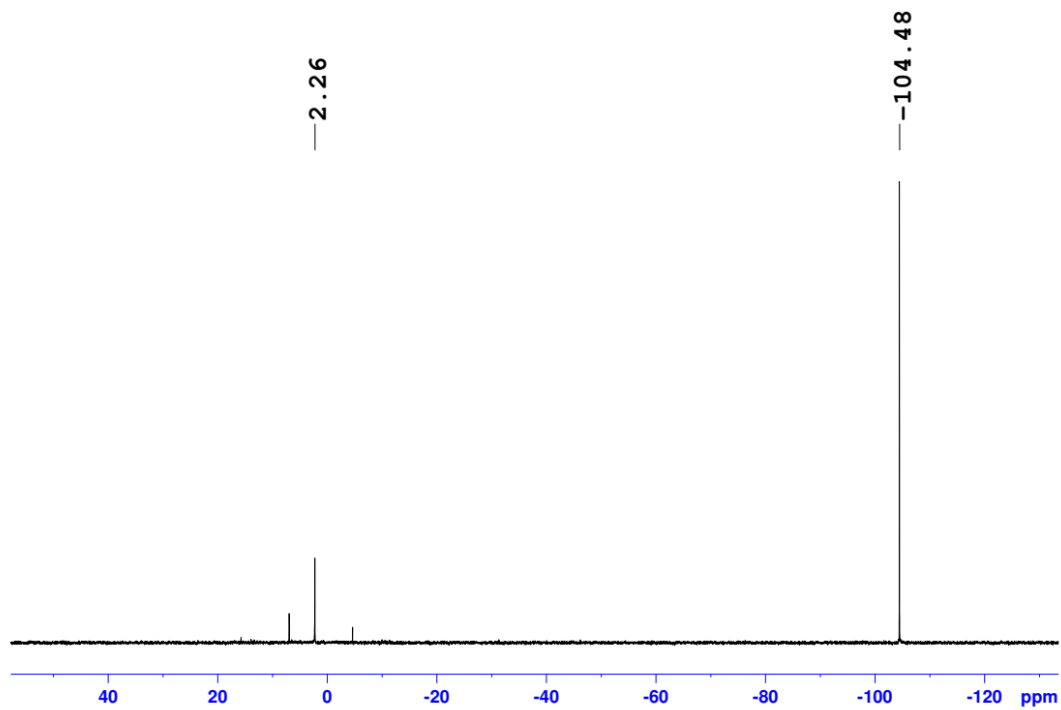

Fig. S18  $^{31}\text{P}\{^1\text{H}\}$  NMR spectrum of **11** in  $\text{CD}_3\text{CN}$  at RT.

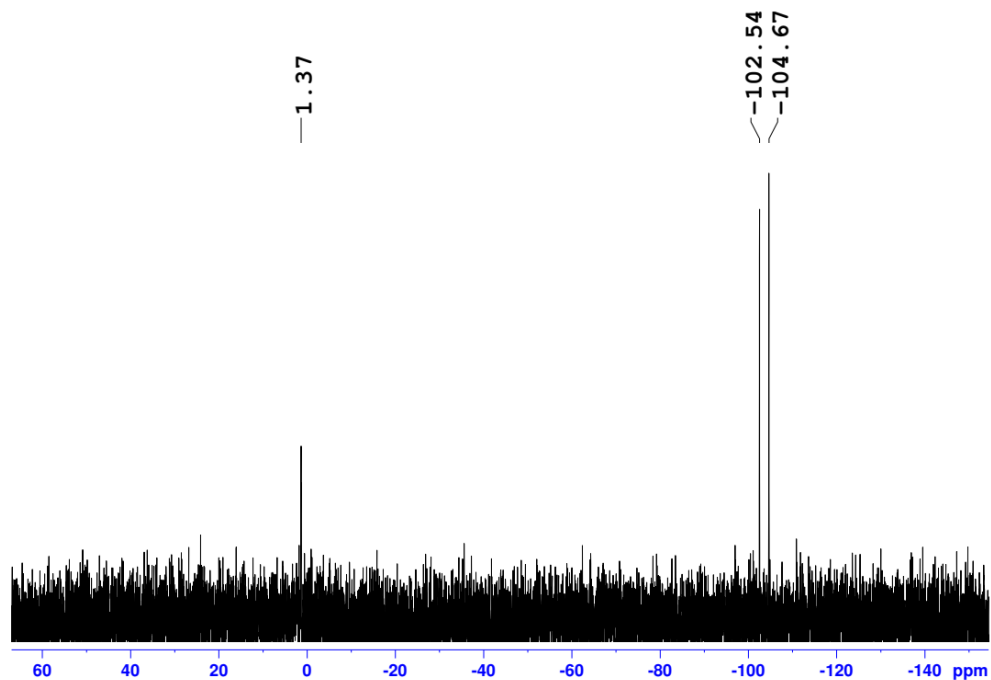

Fig. S19  $^{31}\text{P}$  NMR spectrum of **11** in  $\text{CD}_3\text{CN}$  at RT.

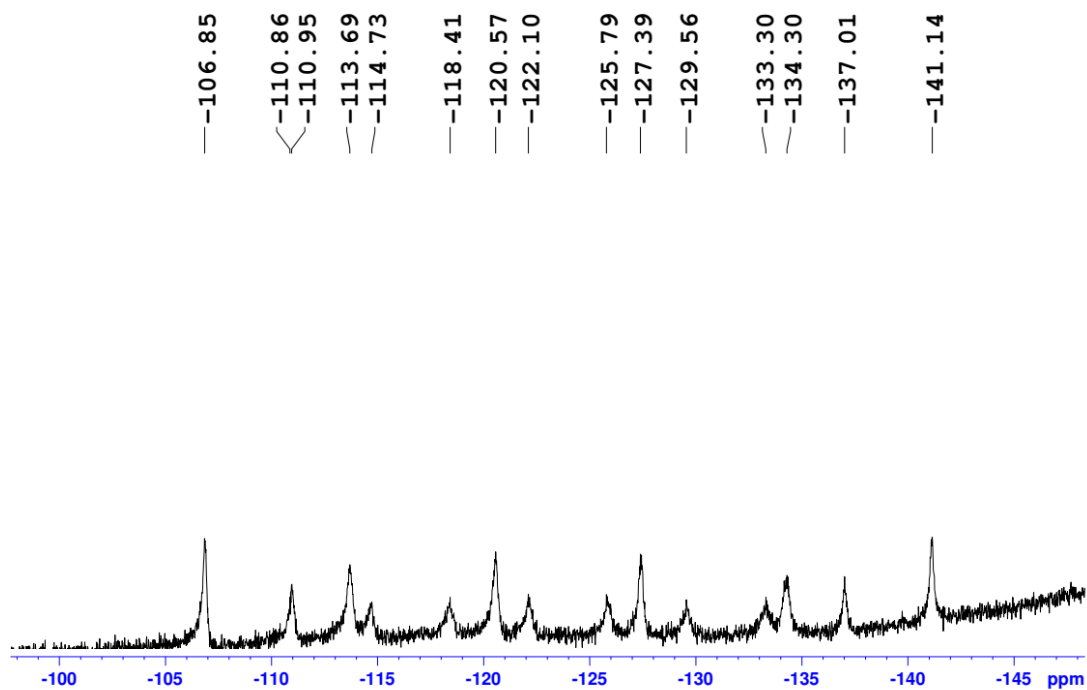

Fig. S20  $^{19}\text{F}$  NMR spectrum of **11** in  $\text{CD}_3\text{CN}$  at RT

## Synthesis of 13

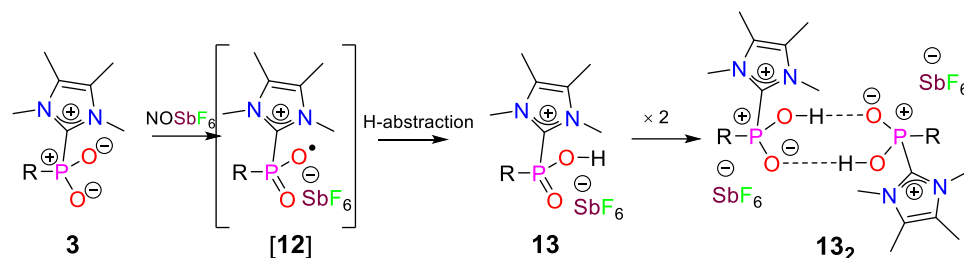

15 mL of  $\text{CH}_3\text{CN}$  was added to a Schlenk flask containing 0.200 g (0.40 mmol) of **3** and 0.106 g (0.4 mmol) of  $\text{NOSbF}_6$  at  $-78^\circ\text{C}$ . The reaction mixture was then slowly brought to room temperature over 3 hrs. The colourless solution turned light brown to colourless. Subsequently, the  $^{31}\text{P}$  NMR spectrum of an aliquot from the reaction mixture with 2 drops of  $\text{C}_6\text{D}_6$  shows complete consumption of **3**. After that, all the volatilities were removed under vacuum. The resulting colourless solid was washed with hexane to yield pure compound **13** as solid powder. Single crystals suitable for a X-ray diffraction study were obtained from its saturated solution in DCM on standing overnight at room temperature. **Yield:** 0.275 g (93 %). **M.P.:**  $>180^\circ\text{C}$ .  **$^1\text{H}$  NMR (300 MHz,  $\text{CD}_3\text{CN}$ , 298 K):**  $\delta$  = 1.90 (s, br, 12H,  $\text{CH}_3$  of Mes), 2.04 (s, 6H, s, 6H,  $\text{C}-\text{CCH}_3$ ,  $\text{NHC}^{\text{Me}_4}$ ), 2.27 (s, 6H,  $\text{CH}_3$  of Mes), 3.33 (s, 6H,  $\text{N}-\text{CH}_3$  of  $\text{NHC}^{\text{Me}_4}$ ), 5.60 (s, br, 1H,  $\text{PO}-\text{H}$ ), 7.10 (s, 4H,  $\text{Ar}-\text{H}$ ), 7.12-7.15 (m, 2H,  $\text{Ar}-\text{H}$ ), 7.70 (t, 1H,  $^3J_{(1\text{H}, 1\text{H})} = 7.8$  Hz) ppm.  **$^{13}\text{C}\{^1\text{H}\}$  NMR (75.43 MHz,  $\text{CD}_3\text{CN}$ , 298 K):**  $\delta$  = 9.3 (2C,  $\text{CH}_3$ ,  $\text{CH}_3\text{C}-\text{CCH}_3$ ,  $\text{NHC}^{\text{Me}_4}$ ), 21.5 (2C,  $\text{CH}_3$ -Mes), 21.6 (4C,  $\text{CH}_3$ -Mes), 35.5 (2C,  $\text{N}-\text{CH}_3$ ,  $\text{NHC}^{\text{Me}_4}$ ), 129.7 (4C,  $\text{Ar}-\text{CH}$ ), 131.5 (2C,  $\text{CH}_3\text{C}-\text{CCH}_3$ ,  $\text{NHC}^{\text{Me}_4}$ ), 132.6 (1C,  $\text{Ar}-\text{CH}$ ), 132.8 (1C,  $\text{Ar}-\text{CH}$ ), 134.6 (1C,  $\text{Ar}-\text{CH}$ ), 137.3 (6C,  $\text{Ar}-\text{C}_{\text{quat}}$ ), 138.4 (2C,  $\text{Ar}-\text{C}_{\text{quat}}$ ), 138.8 (3C,  $\text{Ar}-\text{C}_{\text{quat}}$ ), 146.7 (d,  $^1J_{(31\text{P}, 13\text{C})} = 12.0$  Hz.,  $\text{N}-\text{C}-\text{N}$  of  $\text{NHC}^{\text{Me}_4}$ ) ppm.  **$^{31}\text{P}$  NMR (121.5 MHz,  $\text{CD}_3\text{CN}$ , 298 K):**  $\delta$  = 8.1 ppm.  **$^{19}\text{F}$  NMR (282.4 MHz,  $\text{CD}_3\text{CN}$ , 298 K):**  $\delta$  = -123.94 (m, 6F, (sex,  $^1J_{(121\text{Sb}, 19\text{F})} = 1936$  Hz & oct,  $^1J_{(123\text{Sb}, 19\text{F})} = 1050$  Hz.)) ppm. **FT-IR (KBr,  $\text{cm}^{-1}$ ):**  $\bar{\nu}$  ( $\text{cm}^{-1}$ ) = 2958(s), 2967 (s), 2856 (vs), 2732 (vw), 2231 (w, br,  $\text{P}-\text{H}$ ), 1630 (w), 1612 (w), 1563 (w), 1488 (m), 1451 (m), 1350 (w), 1235 (s), 1185 (vs), 1118 (s), 1094 (w), 1062 (m), 1029 (s), 974 (m, br), 857 (vs), 809 (s), 772 (s), 759 (mw), 732 (w), 663 (vs), 607 (s), 556(s), 537 (s). **Elemental Analysis:** Calcd. for  $(\text{C}_{31}\text{H}_{38}\text{N}_2\text{O}_2\text{PSbF}_6)$ : C, 50.49; H, 5.19; N, 3.80; Found: C, 49.10; H, 5.40; N 3.80 (the deviation of the elemental analysis result is most likely due to the presence of very minor amount of unassigned impurity, which can be seen in the  $^1\text{H}$  NMR spectrum).

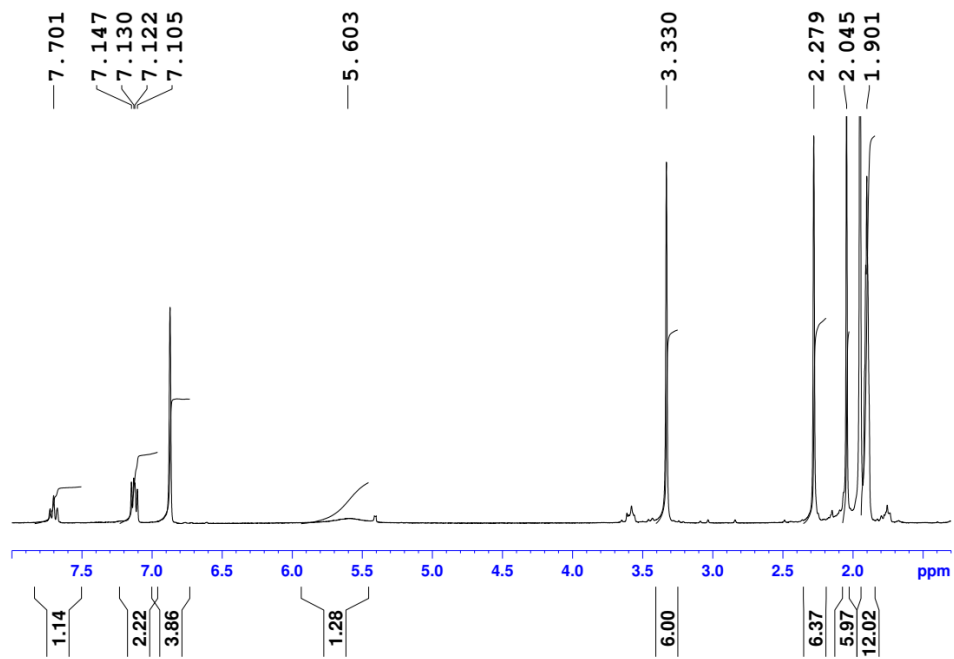

Fig. 21  $^1\text{H}$  NMR spectrum of **13** in  $\text{CD}_3\text{CN}$  at RT.

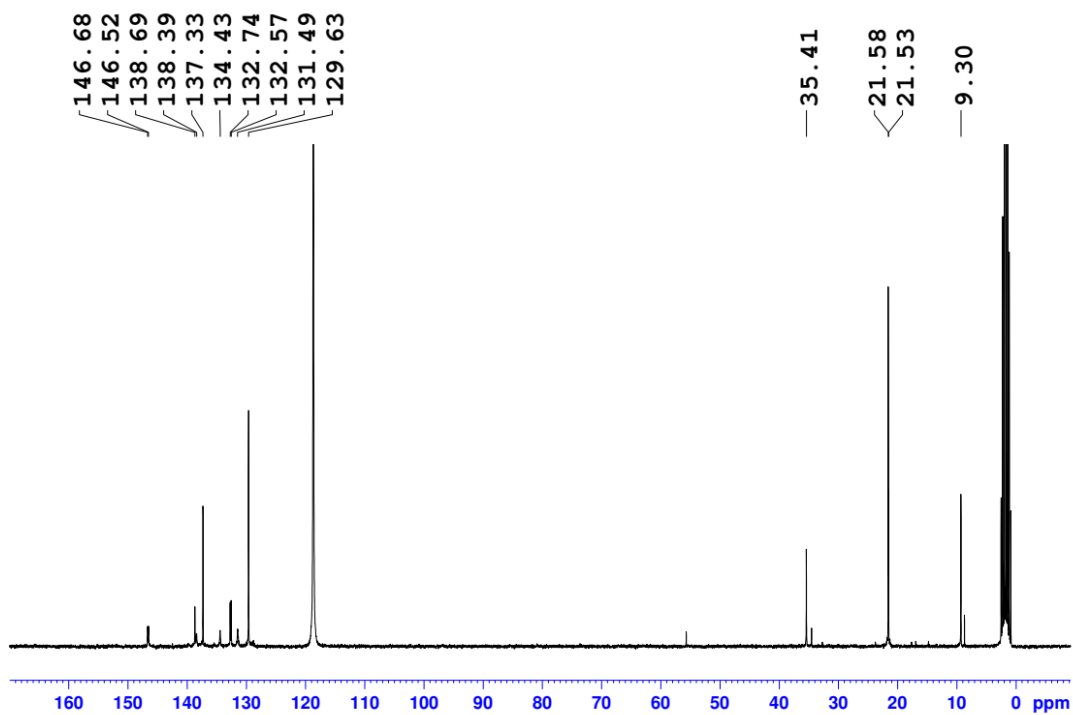

Fig. S22  $^{13}\text{C}\{^1\text{H}\}$  NMR spectrum of **13** in  $\text{CD}_3\text{CN}$  at RT.

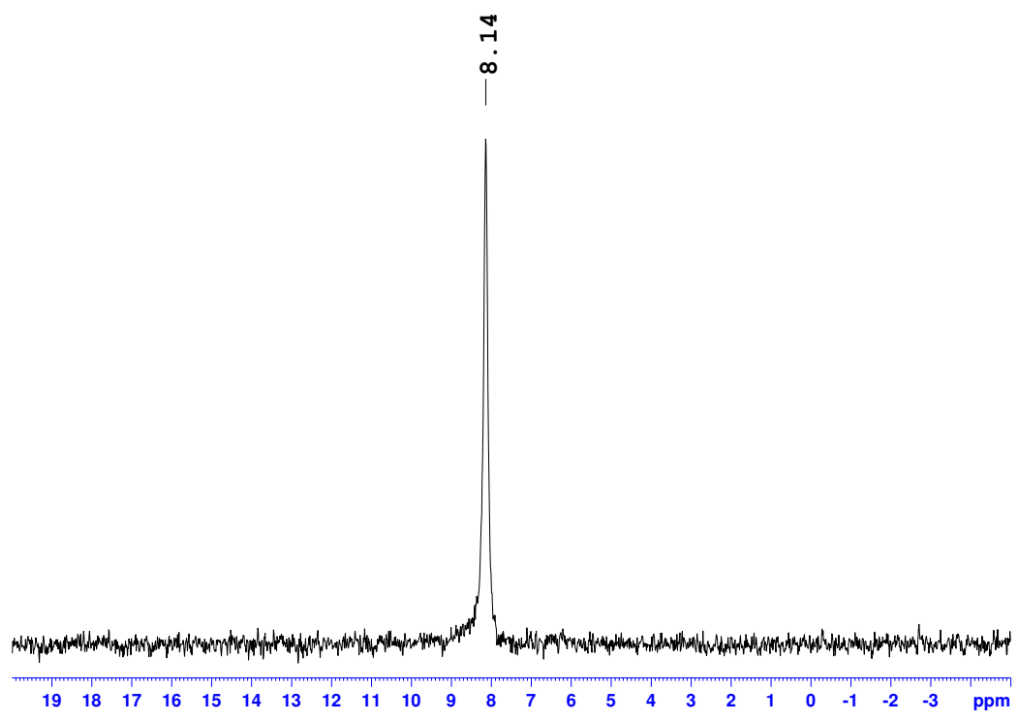

Fig. S23 <sup>31</sup>P{<sup>1</sup>H} NMR spectrum of **13** in CD<sub>3</sub>CN at RT.

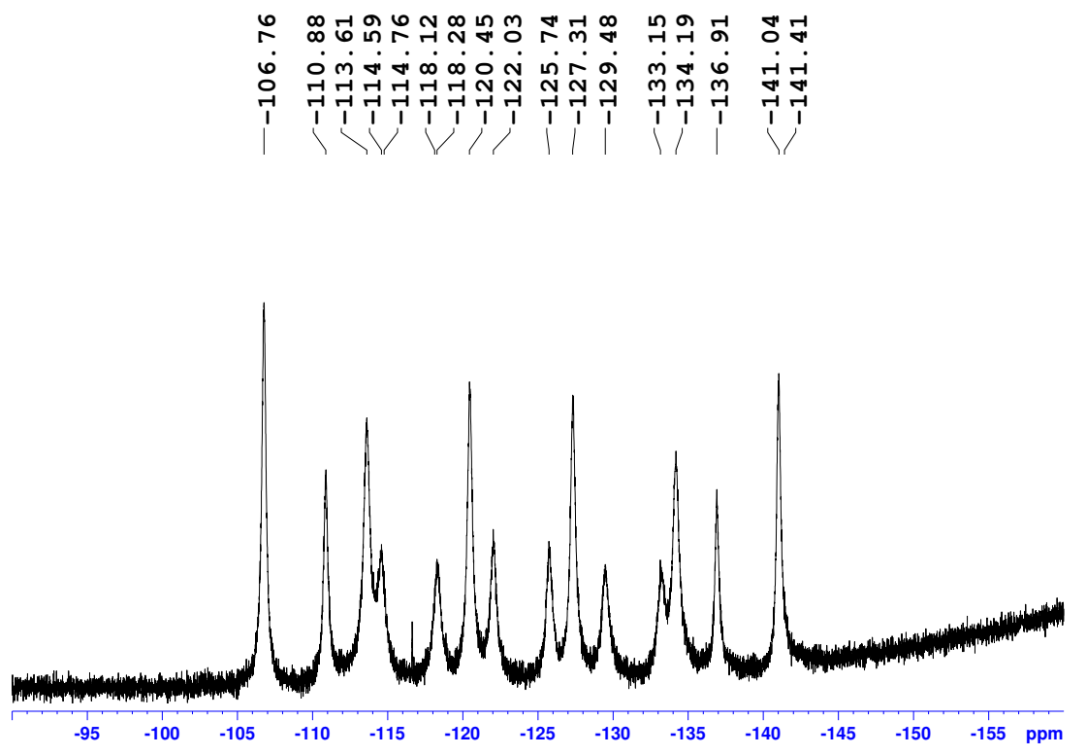

Fig. S24 <sup>19</sup>F NMR spectrum of **13** in CD<sub>3</sub>CN at RT.

## Molecular Structures of 9, 11, and 13·DCM

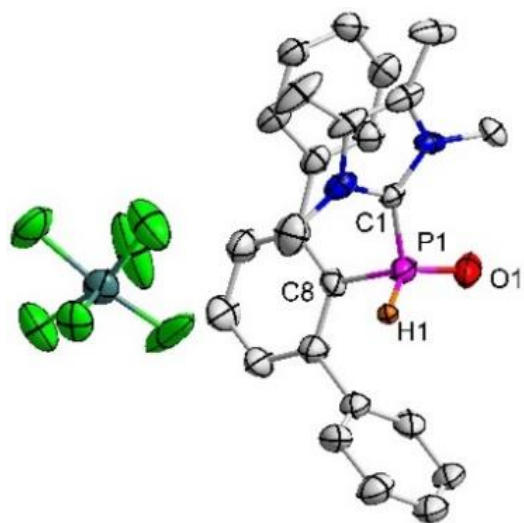

**Fig. S25** Molecular structure of **9**, all hydrogen atoms except those at the P1-centre and all mesityl methyl groups are omitted for clarity.

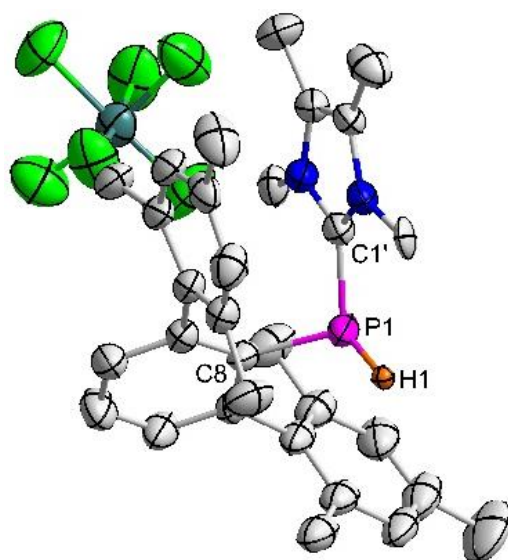

**Fig. S26** Molecular structure of **11**, all hydrogen atoms except those at the P1-centre and all mesityl methyl groups are omitted for clarity.

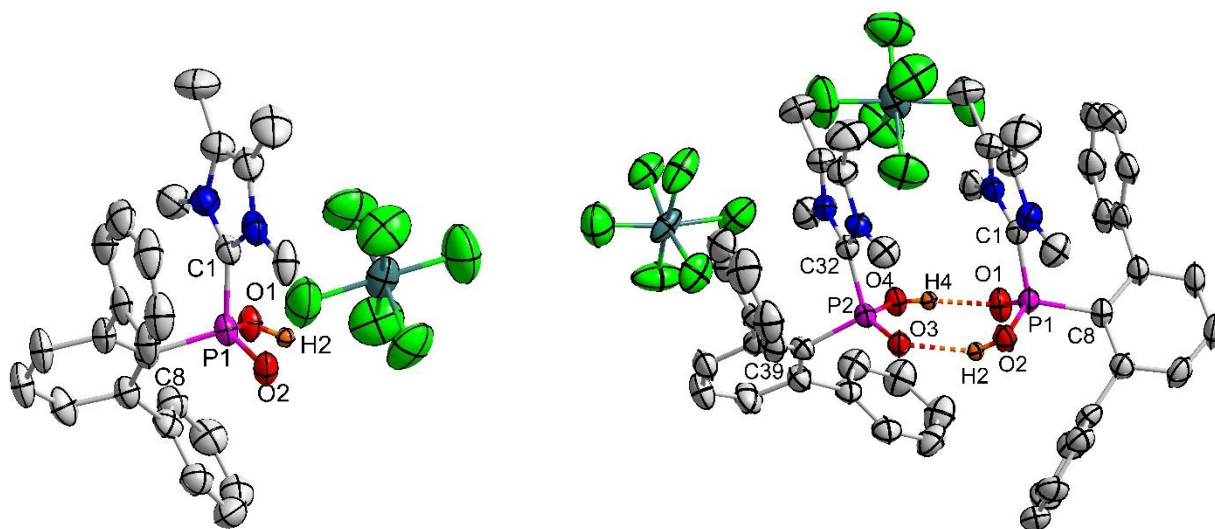

**Fig. S27** Monomeric (left) and H-bonded dimeric (right) molecular structure of **13·DCM**; all hydrogen atoms except at O1 (for the monomeric structure) and O2 and O4 (for H-bonded dimeric structure) and all mesityl methyl groups are omitted for clarity.



## Crystallographic Details

Single crystal X-ray data of **2** and **3** were collected at 298 K and those for **9**, **11** and **13-DCM** were collected at 293 K using a Rigaku XtaLAB AFC12 (RINC): Kappa single diffractometer with graphite-monochromated Mo  $K\alpha$  radiation,  $\lambda = 0.71073 \text{ \AA}$ . Single crystal X-ray data of **6·3C<sub>6</sub>H<sub>6</sub>** were collected at 170 K using a STOE-IPDS 2T diffractometer with graphite-monochromated molybdenum  $K\alpha$  radiation,  $\lambda = 0.71073 \text{ \AA}$ . The unit cell parameters and the data reduction were obtained with the CrysAlisPro software from Rigaku Oxford Diffraction or with X-Area from STOE.<sup>52</sup> A multi-scan absorption correction was applied to the collected reflections during data processing with SCALE3 ABSPACK also integrated in the CrysAlisPro software.<sup>53</sup> For **6·3C<sub>6</sub>H<sub>6</sub>** a numerical absorption correction was carried out with X-Red32 and X-Shape from STOE. The structures were solved with SHELXT<sup>54</sup> structure solution program using Intrinsic phasing and refined by full matrix least-squares methods based on  $F^2$  using the SHELXL<sup>54</sup> refinement programme in the Olex-2 GUI.<sup>55</sup> All non-hydrogen-atoms were refined with anisotropic displacement parameters. Hydrogens were placed in geometrically calculated positions or found in the Fourier difference map and included in the refinement process using the riding model. The program Diamond (version 3.2k) was used for creating the crystallographic figures.<sup>56</sup> In the refinement of **6·3C<sub>6</sub>H<sub>6</sub>** two of the three benzene solvent molecules did not behave well due to disorder. The carbon atoms were fixed to form ideal hexagons and their displacement parameters were constrained to be almost the same for all six carbon atoms of each ring (AFIX, SIMU, DELU). In compound **11** the  $\text{SbF}_6^-$  anion is disordered over two positions involving all six F atoms. This was modelled with SAME, SIMU and DELU constraints. The occupancies are roughly 60% and 40%. The imidazole-like heterocyclic substituent on P is disordered entirely (i.e. all N and all C appear in two positions). This was also modelled with SAME, SIMU and DELU constraints. The respective occupancies are roughly 58% and 42%. The hydrogen atom on P was refined freely with regard to location and its  $U_{\text{iso}}$  constrained to 1.5 times that of P. The crystal of **13-DCM** was a non-merohedral twin (presence of a minor domain accounting for ca. 17%) and the data were refined using a hklf5 file. The lattice dichloromethane is disordered over two positions. This was refined with SADI, SIMU and DELU constraints. The occupancies are roughly 80% and 20%. Both  $\text{SbF}_6^-$  anions are disordered and both were treated with SAME, SIMU and DELU constraints. The occupancies for Sb1 are 72% and 28% and those for Sb2 are 57% and 43%. Clear outliers were omitted from the refinement (OMIT). Because it was not possible to refine them, the oxygen bound hydrogen atoms were fixed.

**Table S1.** Crystal data and structure refinement for **2** (CCDC: 1985944)

|                                             |                                                               |
|---------------------------------------------|---------------------------------------------------------------|
| Identification code                         | AJ1010                                                        |
| Empirical formula                           | C <sub>31</sub> H <sub>37</sub> N <sub>2</sub> OP             |
| Formula weight                              | 484.59                                                        |
| Temperature/K                               | 298.16(10)                                                    |
| Crystal system                              | monoclinic                                                    |
| Space group                                 | P2 <sub>1</sub>                                               |
| a/Å                                         | 8.0570(6)                                                     |
| b/Å                                         | 14.0475(13)                                                   |
| c/Å                                         | 12.2644(9)                                                    |
| α/°                                         | 90                                                            |
| β/°                                         | 95.457(6)                                                     |
| γ/°                                         | 90                                                            |
| Volume/Å <sup>3</sup>                       | 1381.80(19)                                                   |
| Z                                           | 2                                                             |
| ρ <sub>calc</sub> /cm <sup>3</sup>          | 1.165                                                         |
| μ/mm <sup>-1</sup>                          | 0.125                                                         |
| F(000)                                      | 520.0                                                         |
| Crystal size/mm <sup>3</sup>                | 0.34 × 0.23 × 0.19                                            |
| Radiation                                   | MoKα (λ = 0.71073)                                            |
| 2θ range for data collection/°              | 5.8 to 57.916                                                 |
| Index ranges                                | -9 ≤ h ≤ 10, -18 ≤ k ≤ 15, -15 ≤ l ≤ 16                       |
| Reflections collected                       | 15907                                                         |
| Independent reflections                     | 5547 [R <sub>int</sub> = 0.1035, R <sub>sigma</sub> = 0.0980] |
| Data/restraints/parameters                  | 5547/1/326                                                    |
| Goodness-of-fit on F <sup>2</sup>           | 1.055                                                         |
| Final R indexes [I ≥ 2σ (I)]                | R <sub>1</sub> = 0.0681, wR <sub>2</sub> = 0.1850             |
| Final R indexes [all data]                  | R <sub>1</sub> = 0.0876, wR <sub>2</sub> = 0.1970             |
| Largest diff. peak/hole / e Å <sup>-3</sup> | 0.52/-0.20                                                    |

**Table S2.** Crystal data and structure refinement for **3** (CCDC: 2082008)

|                                             |                                                                 |
|---------------------------------------------|-----------------------------------------------------------------|
| Identification code                         | aj1003                                                          |
| Empirical formula                           | C <sub>31</sub> H <sub>37</sub> N <sub>2</sub> O <sub>2</sub> P |
| Formula weight                              | 500.59                                                          |
| Temperature/K                               | 293(2)                                                          |
| Crystal system                              | monoclinic                                                      |
| Space group                                 | P2 <sub>1</sub> /n                                              |
| a/Å                                         | 14.0017(10)                                                     |
| b/Å                                         | 14.1141(8)                                                      |
| c/Å                                         | 14.6959(11)                                                     |
| α/°                                         | 90                                                              |
| β/°                                         | 109.903(8)                                                      |
| γ/°                                         | 90                                                              |
| Volume/Å <sup>3</sup>                       | 2730.8(3)                                                       |
| Z                                           | 4                                                               |
| ρ <sub>calc</sub> /cm <sup>3</sup>          | 1.218                                                           |
| μ/mm <sup>-1</sup>                          | 0.131                                                           |
| F(000)                                      | 1072.0                                                          |
| Crystal size/mm <sup>3</sup>                | 0.250 × 0.190 × 0.140                                           |
| Radiation                                   | MoKα (λ = 0.71073)                                              |
| 2θ range for data collection/°              | 4.948 to 58.042                                                 |
| Index ranges                                | -18 ≤ h ≤ 17, -19 ≤ k ≤ 17, -17 ≤ l ≤ 18                        |
| Reflections collected                       | 18615                                                           |
| Independent reflections                     | 5983 [R <sub>int</sub> = 0.0580, R <sub>sigma</sub> = 0.0722]   |
| Data/restraints/parameters                  | 5983/0/335                                                      |
| Goodness-of-fit on F <sup>2</sup>           | 1.015                                                           |
| Final R indexes [I ≥ 2σ (I)]                | R <sub>1</sub> = 0.0609, wR <sub>2</sub> = 0.1371               |
| Final R indexes [all data]                  | R <sub>1</sub> = 0.1066, wR <sub>2</sub> = 0.1558               |
| Largest diff. peak/hole / e Å <sup>-3</sup> | 0.29/-0.27                                                      |

**Table S3.** Crystal data and structure refinement for **6-3C<sub>6</sub>H<sub>6</sub>** (CCDC: 1985948)

|                                             |                                                                                               |
|---------------------------------------------|-----------------------------------------------------------------------------------------------|
| Identification code                         | DD 1155 B                                                                                     |
| Empirical formula                           | C <sub>128</sub> H <sub>142</sub> K <sub>4</sub> N <sub>4</sub> O <sub>4</sub> P <sub>4</sub> |
| Formula weight                              | 2080.73                                                                                       |
| Temperature/K                               | 170.15(2) K                                                                                   |
| Crystal system                              | triclinic                                                                                     |
| Space group                                 | P-1                                                                                           |
| a/Å                                         | 13.406(3)                                                                                     |
| b/Å                                         | 14.783(3)                                                                                     |
| c/Å                                         | 30.449(6)                                                                                     |
| α/°                                         | 99.67(3)                                                                                      |
| β/°                                         | 102.51(3)                                                                                     |
| γ/°                                         | 96.47(3)                                                                                      |
| Volume/Å <sup>3</sup>                       | 5737(2)                                                                                       |
| Z                                           | 2                                                                                             |
| ρ <sub>calc</sub> /cm <sup>3</sup>          | 1.204                                                                                         |
| μ/mm <sup>-1</sup>                          | 0.265                                                                                         |
| F(000)                                      | 2212                                                                                          |
| Crystal size/mm <sup>3</sup>                | 0.389 x 0.333 x 0.272                                                                         |
| Radiation                                   | MoKα (λ = 0.71073)                                                                            |
| 2θ range for data collection/°              | 6.102 to 52.744                                                                               |
| Index ranges                                | -16 ≤ h ≤ 16, -18 ≤ k ≤ 18, -38 ≤ l ≤ 38                                                      |
| Reflections collected                       | 48722                                                                                         |
| Independent reflections                     | 23376 [R(int) = 0.0781]                                                                       |
| Data/restraints/parameters                  | 23376 / 96 / 1306                                                                             |
| Goodness-of-fit on F <sup>2</sup>           | 1.020                                                                                         |
| Final R indexes [I ≥ 2σ (I)]                | R1 = 0.0656, wR2 = 0.1632                                                                     |
| Final R indexes [all data]                  | R1 = 0.1286, wR2 = 0.1940                                                                     |
| Largest diff. peak/hole / e Å <sup>-3</sup> | hole 0.68 and -0.45                                                                           |

**Table S4.** Crystal data and structure refinement for **9** (CCDC: 1985946)

|                                             |                                                                    |
|---------------------------------------------|--------------------------------------------------------------------|
| Identification code                         | AJ1015                                                             |
| Empirical formula                           | C <sub>31</sub> H <sub>38</sub> F <sub>6</sub> N <sub>2</sub> OPSb |
| Formula weight                              | 721.35                                                             |
| Temperature/K                               | 293(2)                                                             |
| Crystal system                              | orthorhombic                                                       |
| Space group                                 | Pnn2                                                               |
| a/Å                                         | 38.5155(18)                                                        |
| b/Å                                         | 9.8022(5)                                                          |
| c/Å                                         | 8.6041(4)                                                          |
| α/°                                         | 90                                                                 |
| β/°                                         | 90                                                                 |
| γ/°                                         | 90                                                                 |
| Volume/Å <sup>3</sup>                       | 3248.4(3)                                                          |
| Z                                           | 4                                                                  |
| ρ <sub>calc</sub> /cm <sup>3</sup>          | 1.475                                                              |
| μ/mm <sup>-1</sup>                          | 0.959                                                              |
| F(000)                                      | 1464.0                                                             |
| Crystal size/mm <sup>3</sup>                | 0.17 × 0.14 × 0.11                                                 |
| Radiation                                   | MoKα (λ = 0.71073)                                                 |
| 2θ range for data collection/°              | 5.186 to 50.044                                                    |
| Index ranges                                | -45 ≤ h ≤ 42, -11 ≤ k ≤ 10, -10 ≤ l ≤ 10                           |
| Reflections collected                       | 38805                                                              |
| Independent reflections                     | 5736 [R <sub>int</sub> = 0.1669, R <sub>sigma</sub> = 0.0811]      |
| Data/restraints/parameters                  | 5736/1/394                                                         |
| Goodness-of-fit on F <sup>2</sup>           | 1.041                                                              |
| Final R indexes [I ≥ 2σ (I)]                | R <sub>1</sub> = 0.0701, wR <sub>2</sub> = 0.1827                  |
| Final R indexes [all data]                  | R <sub>1</sub> = 0.0881, wR <sub>2</sub> = 0.1949                  |
| Largest diff. peak/hole / e Å <sup>-3</sup> | 0.83/-0.49                                                         |

**Table S5.** Crystal data and structure refinement for **11** (CCDC: 2082011)

|                                             |                                                                   |
|---------------------------------------------|-------------------------------------------------------------------|
| Identification code                         | aj1026                                                            |
| Empirical formula                           | C <sub>31</sub> H <sub>38</sub> F <sub>6</sub> N <sub>2</sub> PSb |
| Formula weight                              | 705.35                                                            |
| Temperature/K                               | 293(2)                                                            |
| Crystal system                              | orthorhombic                                                      |
| Space group                                 | Pnn2                                                              |
| a/Å                                         | 38.1631(19)                                                       |
| b/Å                                         | 9.9045(6)                                                         |
| c/Å                                         | 8.5781(5)                                                         |
| α/°                                         | 90                                                                |
| β/°                                         | 90                                                                |
| γ/°                                         | 90                                                                |
| Volume/Å <sup>3</sup>                       | 3242.4(3)                                                         |
| Z                                           | 4                                                                 |
| ρ <sub>calc</sub> /g/cm <sup>3</sup>        | 1.445                                                             |
| μ/mm <sup>-1</sup>                          | 0.957                                                             |
| F(000)                                      | 1432.0                                                            |
| Crystal size/mm <sup>3</sup>                | 0.250 × 0.210 × 0.160                                             |
| Radiation                                   | MoKα (λ = 0.71073)                                                |
| 2θ range for data collection/°              | 5.728 to 57.818                                                   |
| Index ranges                                | -51 ≤ h ≤ 47, -11 ≤ k ≤ 12, -11 ≤ l ≤ 11                          |
| Reflections collected                       | 24941                                                             |
| Independent reflections                     | 7122 [R <sub>int</sub> = 0.1157, R <sub>sigma</sub> = 0.0863]     |
| Data/restraints/parameters                  | 7122/922/515                                                      |
| Goodness-of-fit on F <sup>2</sup>           | 1.014                                                             |
| Final R indexes [I ≥ 2σ (I)]                | R <sub>1</sub> = 0.0624, wR <sub>2</sub> = 0.1564                 |
| Final R indexes [all data]                  | R <sub>1</sub> = 0.0940, wR <sub>2</sub> = 0.1737                 |
| Largest diff. peak/hole / e Å <sup>-3</sup> | 0.66/-0.46                                                        |
| Flack parameter                             | 0.00(3)                                                           |

**Table S6.** Crystal data and structure refinement for **13·DCM** (CCDC: 2082009)

|                                   |                                                                                                                              |
|-----------------------------------|------------------------------------------------------------------------------------------------------------------------------|
| Identification code               | AJ1028                                                                                                                       |
| Empirical formula                 | C <sub>63</sub> H <sub>78</sub> Cl <sub>2</sub> F <sub>12</sub> N <sub>4</sub> O <sub>4</sub> P <sub>2</sub> Sb <sub>2</sub> |
| Formula weight                    | 1559.63                                                                                                                      |
| Temperature                       | 293(2) K                                                                                                                     |
| Wavelength                        | 0.71073 Å                                                                                                                    |
| Crystal system                    | Triclinic                                                                                                                    |
| Space group                       | P-1                                                                                                                          |
| a/Å                               | 12.6743(2)                                                                                                                   |
| b/Å                               | 14.2432(3)                                                                                                                   |
| c/Å                               | 20.3249(7)                                                                                                                   |
| α/°                               | 93.375(2)                                                                                                                    |
| β/°                               | 91.737(2)                                                                                                                    |
| γ/°                               | 108.005(2)                                                                                                                   |
| Volume                            | 3478.82(16) Å <sup>3</sup>                                                                                                   |
| Z, Calculated density             | 2, 1.489 Mg/m <sup>3</sup>                                                                                                   |
| Absorption coefficient            | 0.978 mm <sup>-1</sup>                                                                                                       |
| F(000)                            | 1580                                                                                                                         |
| Crystal size                      | 0.260 x 0.180 x 0.140 mm                                                                                                     |
| Theta range for data collection   | 2.561 to 24.999 deg.                                                                                                         |
| Limiting indices                  | -15 ≤ h ≤ 15, -16 ≤ k ≤ 16, -2 ≤ l ≤ 24                                                                                      |
| Reflections collected / unique    | 12154 / 12154 [R(int) = ?]                                                                                                   |
| Completeness to theta = 24.999    | 99.3 %                                                                                                                       |
| Absorption correction             | Semi-empirical from equivalents                                                                                              |
| Max. and min. transmission        | 1.00000 and 0.84588                                                                                                          |
| Refinement method                 | Full-matrix least-squares on F <sup>2</sup>                                                                                  |
| Data / restraints / parameters    | 12154 / 876 / 978                                                                                                            |
| Goodness-of-fit on F <sup>2</sup> | 1.060                                                                                                                        |
| Final R indices [I > 2σ(I)]       | R1 = 0.0886, wR2 = 0.2396                                                                                                    |
| R indices (all data)              | R1 = 0.1003, wR2 = 0.2498                                                                                                    |
| Extinction coefficient            | n/a                                                                                                                          |
| Largest diff. peak and hole       | 0.641 and -0.630 e.Å <sup>-3</sup>                                                                                           |

## EPR Spectroscopy

EPR measurements at X-band (9.38 GHz) were carried out using a Bruker ELEXSYS E580 CW EPR spectrometer equipped with an Oxford Instruments helium cryostat (ESR900) and a MercuryITC temperature controller. The spectral simulations were performed using MATLAB 9.8 (R2020a) and the EasySpin 5.2.28 toolbox.<sup>57</sup>

### In Situ Reduction Study of **2**

To a cooled toluene solution of **2** at  $-30\text{ }^{\circ}\text{C}$  was added  $\text{KC}_8$ . After filtering, the resulting deep red solution was probed by EPR spectroscopy at ambient temperature.

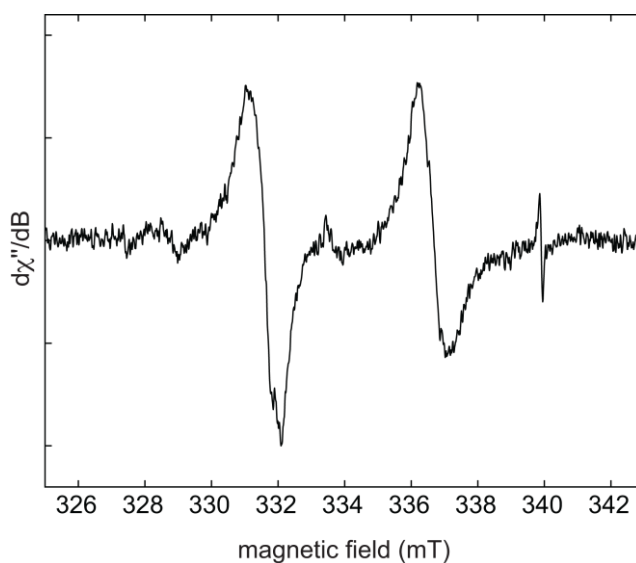

**Fig. S28** Experimental CW EPR spectrum of the putative radical anion of **2** in toluene. The broad doublet has an isotropic  $g$ -value of 2.0059 with a phosphorus hyperfine coupling of  $a(^{31}\text{P}) = 143\text{ MHz}$  (51 G). The spectrum is stable over several hours at room temperature.



## In Situ Oxidation Study of **2**, **1**, and **3**

**General Procedure for Sample Preparation:** The phosphorus compound (**2**, **1**, or **3**) and the nitrosonium hexafluoroantimonate, [NO][SbF<sub>6</sub>], were each dissolved in acetonitrile solution and cooled to -30 °C. The solutions were mixed in the cold, transferred into an EPR tube and immediately frozen by using an acetone/liquid nitrogen bath. The EPR response was constantly monitored during thawing of the frozen solutions in the spectrometer cavity.

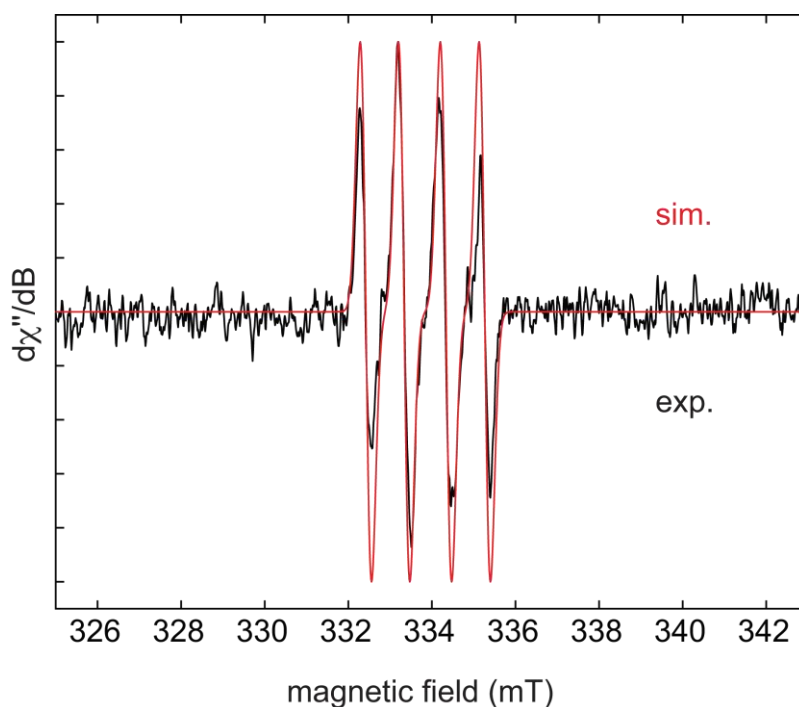

**Fig. S29** Experimental and simulated CW EPR spectra of [7] (radical cation of **2**) in acetonitrile. Simulation parameters:  $g_{\text{iso}} = 2.0064$ ,  $a(^{31}\text{P}) = 54$  MHz, and  $a(^1\text{H or }^{19}\text{F}) = 26$  MHz.

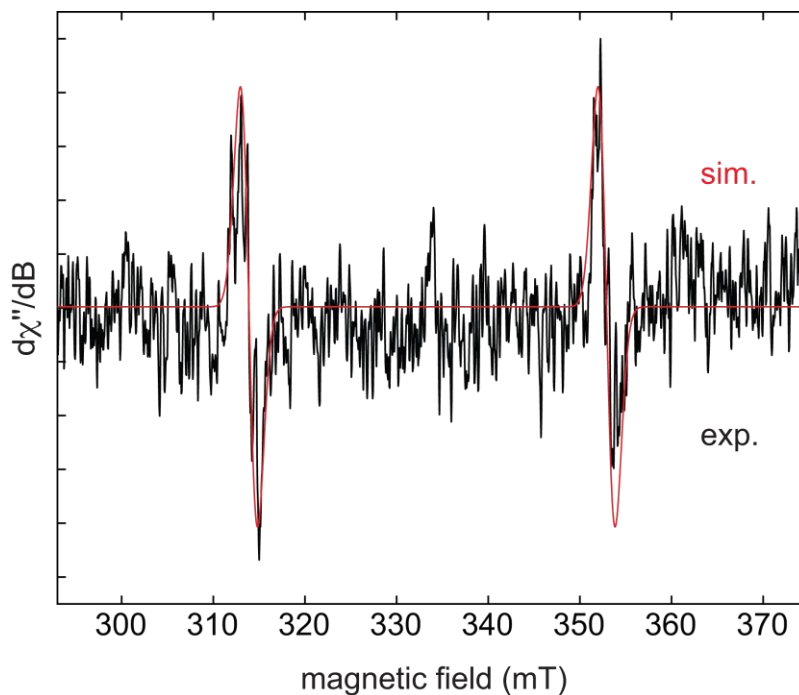

**Fig. S30** Experimental and simulated CW EPR spectra of **[10]** (radical cation of **1**) in acetonitrile. Simulation parameters:  $g_{\text{iso}} = 2.0021$  and  $a(^{31}\text{P}) = 1090$  MHz (389 G).

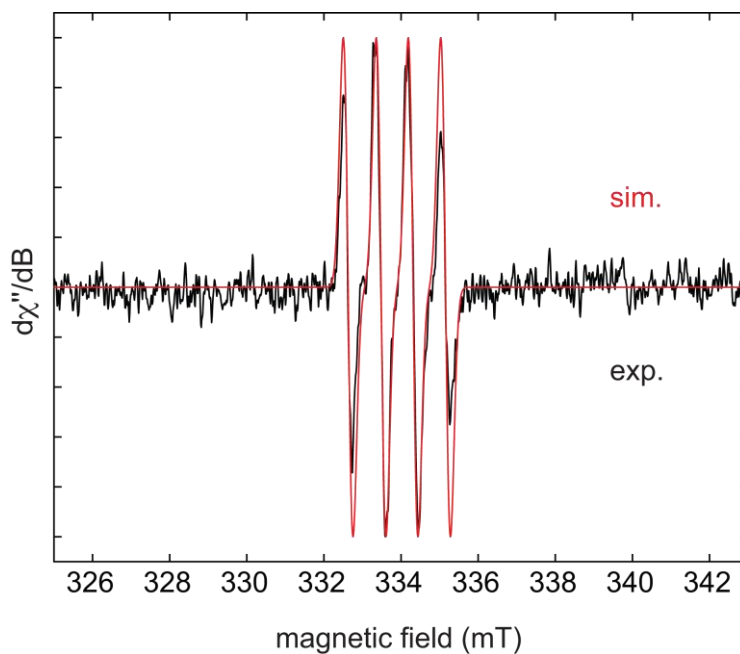

**Fig. S31** Experimental (black) and simulated (red) CW EPR spectra of **[12]** (radical cation of **3**) in acetonitrile. Simulation parameters:  $g_{\text{iso}} = 2.0069$ ,  $a(^{31}\text{P}) = 47$  MHz, and  $a(^1\text{H} \text{ or } ^{19}\text{F}) = 24$  MHz.

## Computational Details

Compounds **1-5** and **7-13** were optimized at the M06<sup>S8</sup>/cc-pVDZ level of theory using the Gaussian 16 program.<sup>S9</sup> The energy difference between singlet and triplet states was calculated for selected molecules and the singlet state was found to be more stable. Therefore, all energies reported here for the neutral molecules correspond to singlet states. Doublet states were considered for the negatively and positively charged species considered here. The images of the frontier orbitals and the spin densities were prepared using the GaussView program.<sup>S10</sup> TD-DFT calculation was performed at the M06/cc-pVDZ level on molecule **2** to calculate the absorption spectrum. EPR calculation was performed at b3lyp<sup>S11</sup>/cc-pVDZ level on radicals **7**, **10** and **12**. Coordinates of these radicals, in the presence and absence of coordinated NHC are also added. Natural Resonance Theory (NRT)<sup>12</sup> calculations were done using NBO 5.9<sup>S13</sup> in Gamess<sup>S14</sup>.

**Bonding Analysis of 2, 2-H, Ph<sub>2</sub>P-O<sup>-</sup>, and H<sub>2</sub>P-O<sup>-</sup>**

**Table S7.** Wiberg bond orders (WBO) of **2** at the HF/6-31G\* level of theory.

| Bond      | WBO    |
|-----------|--------|
| P-O       | 1.0313 |
| P-C (NHC) | 0.7093 |
| P-C (R)   | 0.7716 |

**Table S8.** Orbital contribution in hybridized MO in each bond involving phosphorus of **2** at the HF/6-31G\* level of theory.

| Bond      | Atom | s-orbital % | p-orbital % | d-orbital % |
|-----------|------|-------------|-------------|-------------|
| P-O       | P    | 21.4        | 76.73       | 1.87        |
|           | O    | 38.48       | 61.01       | 0.51        |
| P-C (NHC) | P    | 10.3        | 87.62       | 2.07        |
|           | C    | 39.75       | 60.23       | 0.02        |
| P-C (R)   | P    | 15.09       | 82.98       | 1.94        |
|           | C    | 29.29       | 70.68       | 0.03        |

**Table S9.** Wiberg bond orders (WBO) of **Ph<sub>2</sub>P-O<sup>-</sup>** at the HF/6-31G\* level of theory.

| Bond | WBO    |
|------|--------|
| P-O  | 1.0380 |
| P-C  | 0.7488 |
| P-C  | 0.7488 |

**Table S10.** Orbital contribution in hybridized MO in each bond involving phosphorus of **2-H** at the HF/6-31G\* level of theory.

| Bond | Atom | s-orbital % | p-orbital % | d-orbital % |
|------|------|-------------|-------------|-------------|
| P-O  | P    | 20.93       | 76.80       | 2.27        |
|      | O    | 37.69       | 62.22       | 0.09        |
| P-C  | P    | 14.27       | 83.67       | 2.06        |
|      | C    | 30.32       | 69.66       | 0.02        |
| P-C  | P    | 14.27       | 83.67       | 2.06        |
|      | C    | 30.32       | 69.66       | 0.02        |

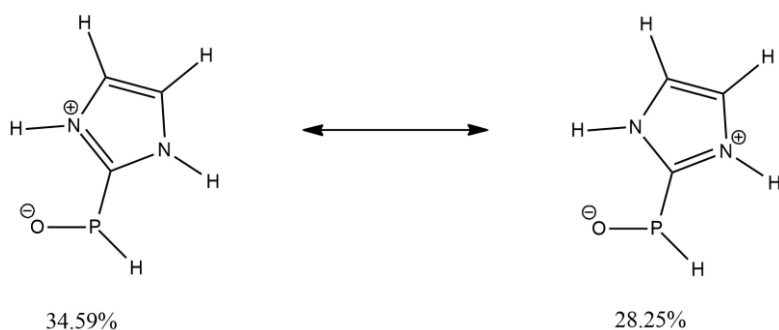

**Fig. S32** The two most dominant resonance structures of **2-H** obtained using natural resonance theory (NRT) analysis at HF/6-31G\* level of theory (R group and CH<sub>3</sub> in NHC ring has been replaced with H to avoid calculating too many possible resonance structures in NRT calculations).

**Table S11.** Selected Natural Bond Order (NBO) of **2-H** involving bonds with phosphorus calculated using NRT analysis at the HF/6-31G\* level of theory.

| <u>Bond</u> | <u>Bond Order</u> |
|-------------|-------------------|
| P-O         | 0.98947           |
| P-H         | 0.94374           |
| P-C         | 0.92817           |

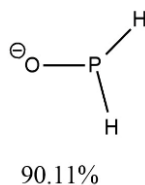

**Fig. S33** The most dominant resonance structure of **H<sub>2</sub>P-O<sup>-</sup>** obtained using NRT analysis at HF/6-31G\* level of theory (benzene rings have been replaced with H to avoid calculating too many possible resonance structures in NRT calculations).

**Table S12.** Natural Bond Order (NBO) of H<sub>2</sub>P-O<sup>-</sup> calculated using NRT analysis at the HF/6-31G\* level of theory.

| <u>Bond</u> | <u>Bond Order</u> |
|-------------|-------------------|
| P-O         | 0.99276           |
| P-H (both)  | 0.94996           |

**Table S13.** Wiberg bond orders (WBO) of **2-H** at the HF/6-31G\* level of theory.

| Bond      | WBO    |
|-----------|--------|
| P-O       | 1.0648 |
| P-C (NHC) | 0.7055 |
| P-H       | 0.8719 |

**Table S14.** Orbital contribution in hybridized MO in each bond involving phosphorus of **2-H** at the HF/6-31G\* level of theory.

| Bond      | Atom | s-orbital % | p-orbital % | d-orbital % |
|-----------|------|-------------|-------------|-------------|
| P-O       | P    | 21.38       | 76.43       | 2.19        |
|           | O    | 35.04       | 64.86       | 0.1         |
| P-C (NHC) | P    | 10.05       | 87.64       | 2.31        |
|           | C    | 39.75       | 60.23       | 0.02        |
| P-H       | P    | 13.39       | 84.32       | 2.29        |
|           | H    | 100         |             |             |

**Table S15.** Wiberg bond orders (WBO) of  $\text{H}_2\text{P-O}^-$  at the HF/6-31G\* level of theory.

| Bond | WBO    |
|------|--------|
| P-O  | 1.0502 |
| P-H  | 0.8722 |
| P-H  | 0.8722 |

**Table S16.** Orbital contribution in hybridized MO in each bond involving phosphorus of  $\text{H}_2\text{P-O}^-$  at the HF/6-31G\* level of theory.

| Bond | Atom | s-orbital % | p-orbital % | d-orbital % |
|------|------|-------------|-------------|-------------|
| P-O  | P    | 22.77       | 75.39       | 1.84        |
|      | O    | 36.07       | 63.72       | 0.22        |
| P-H  | P    | 13.45       | 84.46       | 2.10        |
|      | H    | 100         |             |             |
| P-H  | P    | 13.45       | 84.46       | 2.10        |
|      | H    | 100         |             |             |



### Calculation of EPR Parameters

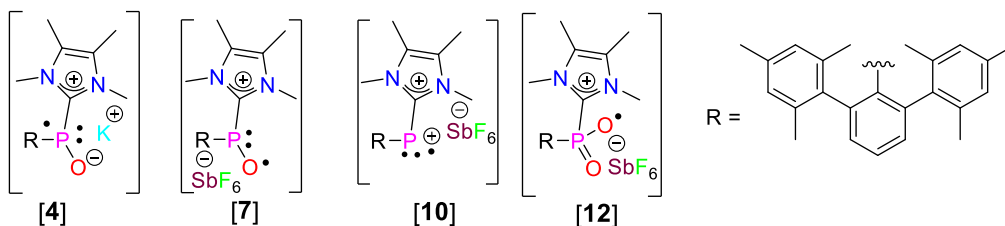

**Table S17.** Calculated EPR parameters for radicals [4], [7], [10] and [12] in presence and absence of coordinated NHC<sup>Me4</sup> considering the presence and absence of CH<sub>3</sub>CN, as a solvent at the b3lyp/cc-pVDZ level of theory (the entries in blue are the best compared values).

| Solvent            | Radical Ion | NHC     | $a(^{31}\text{P})$ (exp.) | $a(^{31}\text{P})$ calc. | $a(^{19}\text{F})$ exp. | $a(^{19}\text{F})$ calc. |
|--------------------|-------------|---------|---------------------------|--------------------------|-------------------------|--------------------------|
| Toluene            | [4]         | Present | 143 MHz                   | -27.45 MHz               | -                       | -                        |
| Toluene            | [4]         | Absent  | 143 MHz                   | 154.48 MHz               | -                       | -                        |
| THF                | [4]         | Present | 143 MHz                   | -26.84 MHz               | -                       | -                        |
| THF                | [4]         | Absent  | 143 MHz                   | 158.21 MHz               | -                       | -                        |
| None               | [7]         | Present | 54 MHz                    | 1257 MHz                 | 26 MHz                  | 113 MHz                  |
| None               | [10]        | Present | 1090 MHz                  | 214 MHz                  | None                    | None                     |
| None               | [12]        | Present | 47 MHz                    | -34 MHz                  | 24 MHz                  | None                     |
| CH <sub>3</sub> CN | [7]         | Present | 54 MHz                    | 1106 MHz                 | 26 MHz                  | 27 MHz                   |
| CH <sub>3</sub> CN | [10]        | Present | 1090 MHz                  | 227 MHz                  | None                    | None                     |
| CH <sub>3</sub> CN | [12]        | Present | 47 MHz                    | -34 MHz                  | 24 MHz                  | None                     |
| None               | [7]         | Absent  | 54 MHz                    | 1327 MHz                 | 26 MHz                  | 144 MHz                  |
| None               | [10]        | Absent  | 1090 MHz                  | 216 MHz                  | None                    | 60 MHz                   |
| None               | [12]        | Absent  | 47 MHz                    | -29 MHz                  | 24 MHz                  | 1.73 MHz*                |
| CH <sub>3</sub> CN | [7]         | Absent  | 54 MHz                    | 177 MHz                  | 26 MHz                  | 27 MHz                   |
| CH <sub>3</sub> CN | [10]        | Absent  | 1090 MHz                  | 157 MHz                  | None                    | 67 MHz                   |
| CH <sub>3</sub> CN | [12]        | Absent  | 47 MHz                    | -19 MHz                  | 24 MHz                  | -3 MHz                   |

\*the F atom is bonded to P radical centre with a bond length of 1.8 Å.

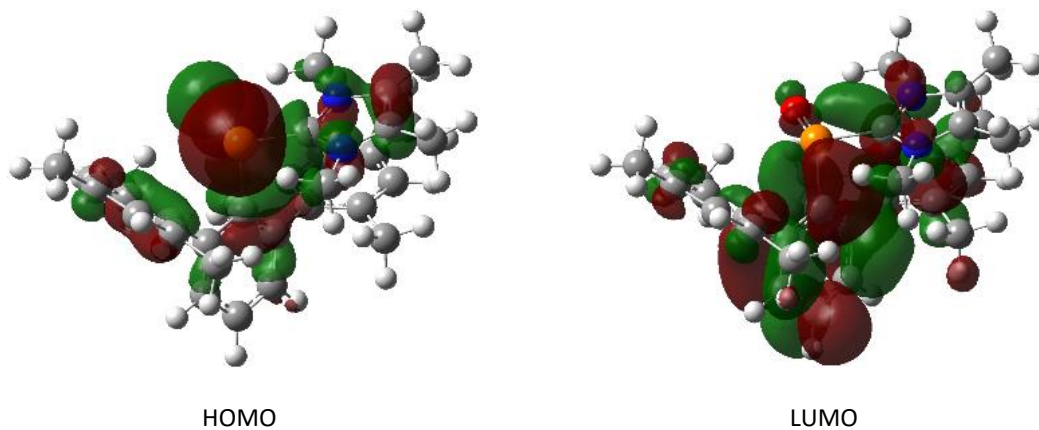

**Fig. S34** Frontier orbitals of **2** calculated at M06/cc-pVDZ level of theory.

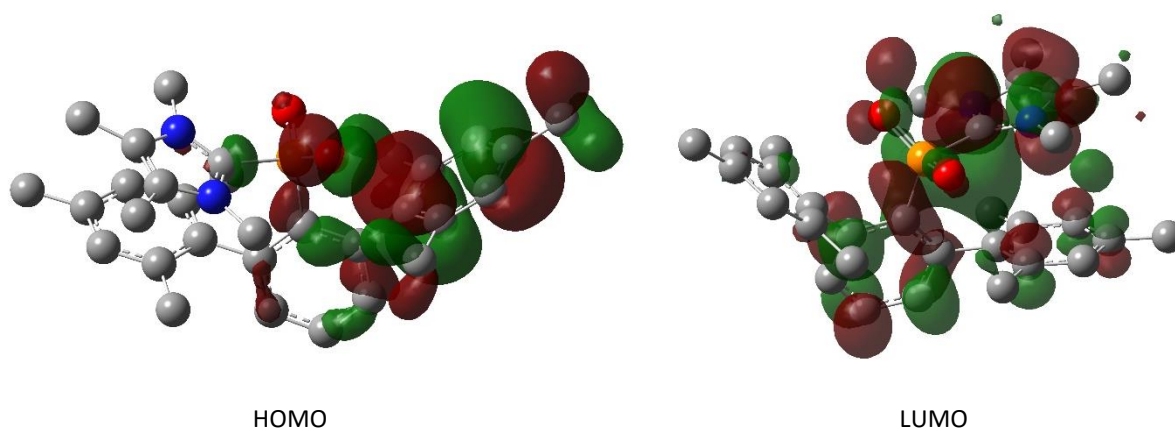

**Fig. S35** Frontier orbitals of **3** calculated at M06/cc-pVDZ level of theory.

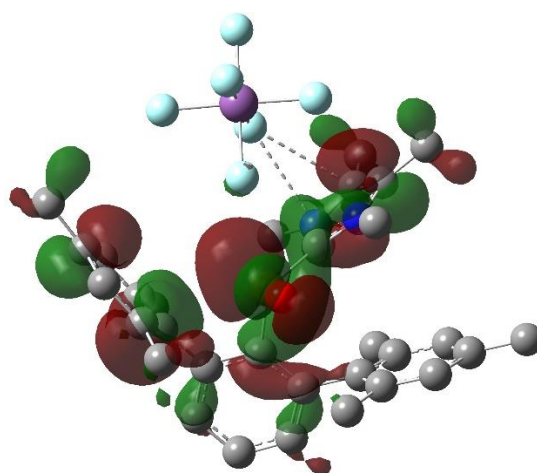

**Fig. S36** Single occupied molecular orbital (SOMO) surfaces of **[7]**.

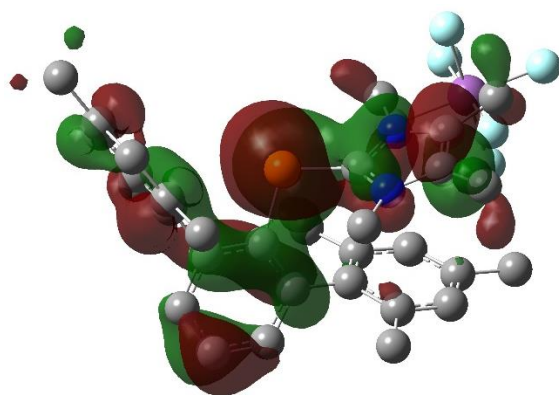

**Fig. S37** Single occupied molecular orbital (SOMO) surfaces of [10].

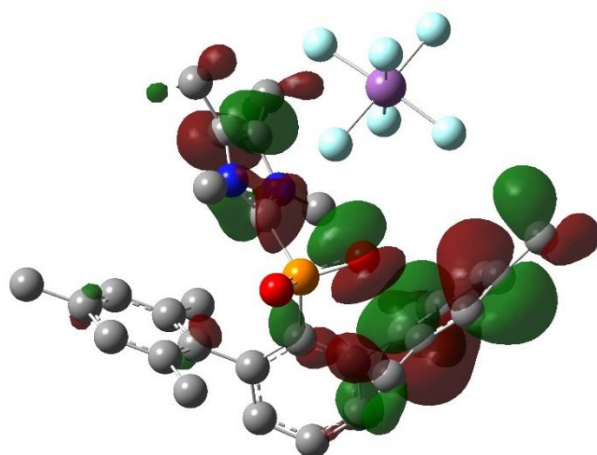

**Fig. S38** Single occupied molecular orbital (SOMO) surfaces of [12].

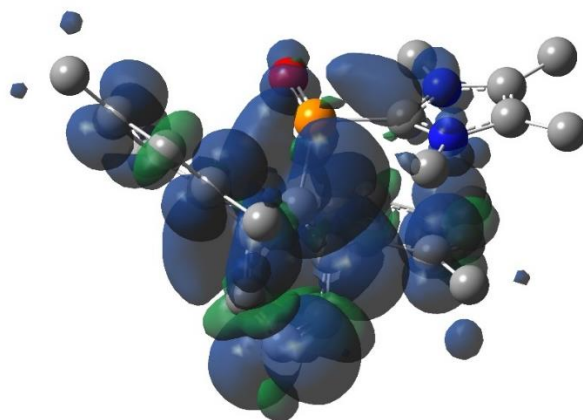

**Fig. 39** Spin density plot of **4** (with  $\text{NHC}^{\text{Me}_4}$ ) at M06/cc-pVDZ level of theory.

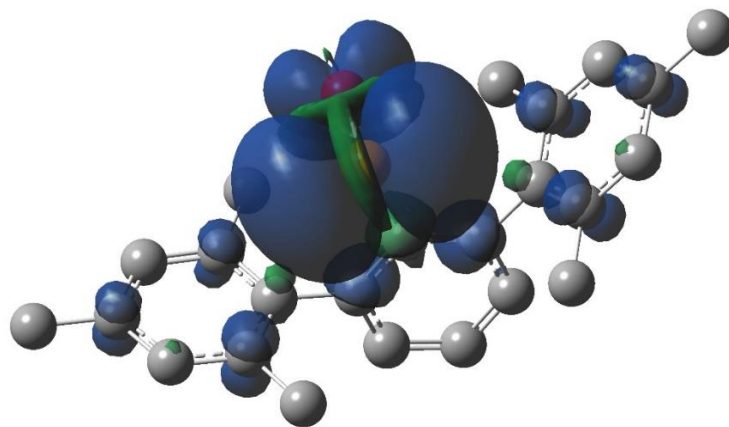

**Fig. S40** Spin density plot of **4** (without  $\text{NHC}^{\text{Me}_4}$ ) at M06/cc-pVDZ level of theory.

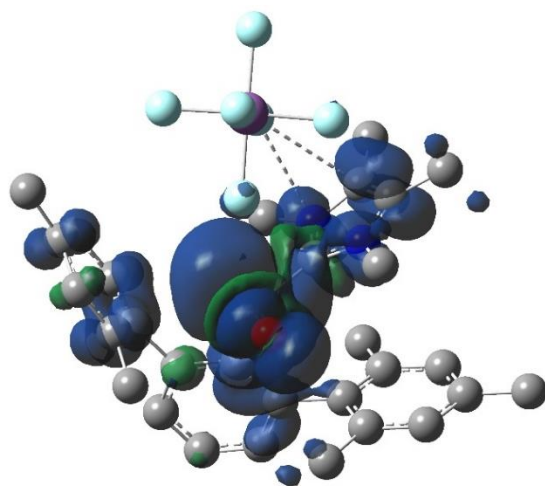

**Fig. S41** Spin density plot of **7** (with  $\text{NHC}^{\text{Me}_4}$ ) at M06/cc-pVDZ level of theory.

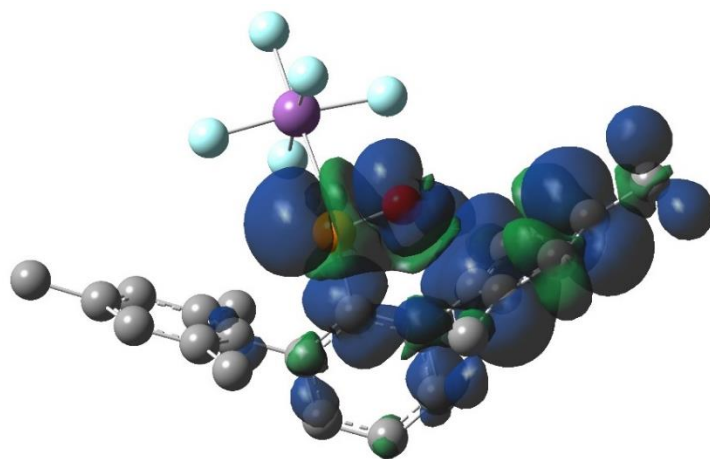

**Fig. S42** Spin density plot of **7** (without  $\text{NHC}^{\text{Me}_4}$ ) at M06/cc-pVDZ level of theory.

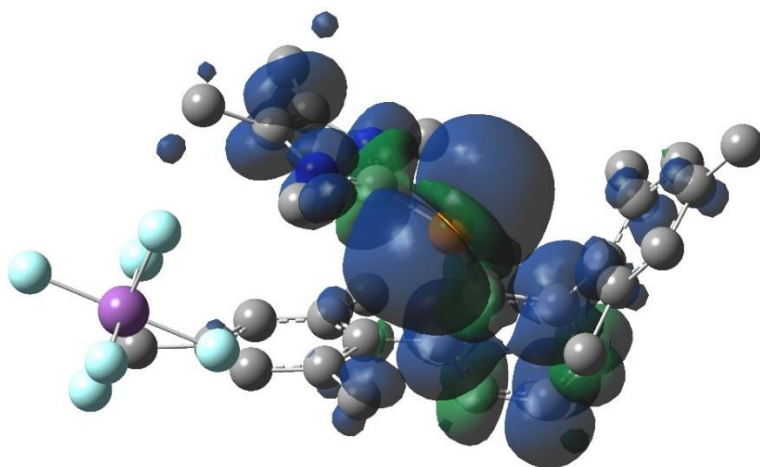

**Fig. S43** Spin density plot of **10** (with NHC<sup>Me4</sup>) at M06/cc-pVDZ level of theory.

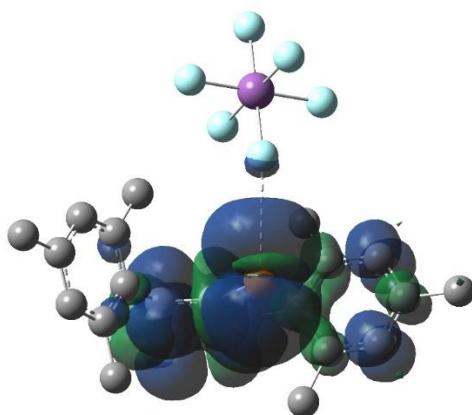

**Fig. S44** Spin density plot of **10** (without NHC<sup>Me4</sup>) at M06/cc-pVDZ level of theory.

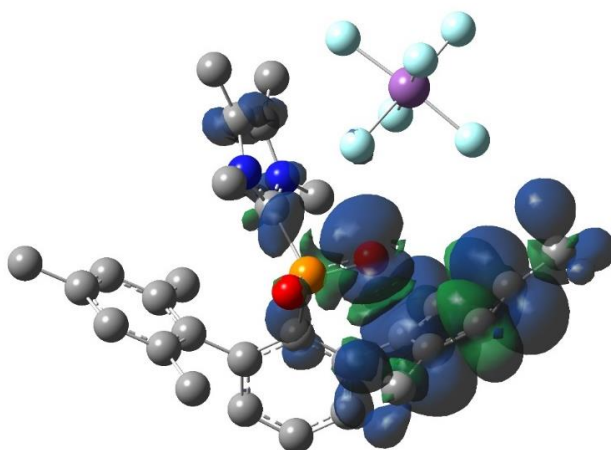

**Fig. S45** Spin density plot of **12** (with NHC<sup>Me4</sup>) at M06/cc-pVDZ level of theory.

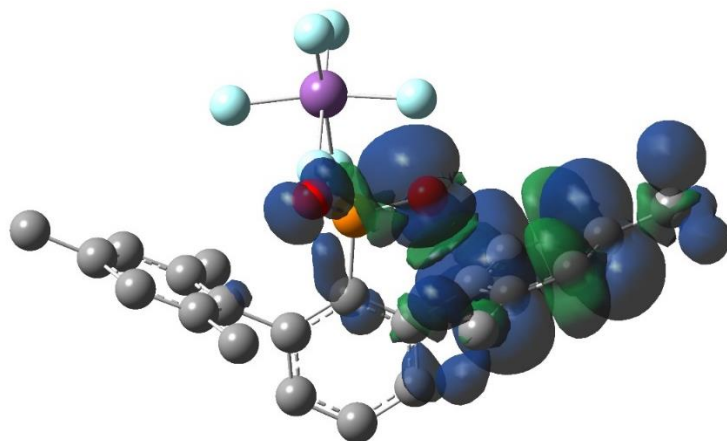

**Fig. S46** Spin density plot of **12** (without  $\text{NHC}^{\text{Me}_4}$ ) at M06/cc-pVDZ level of theory.

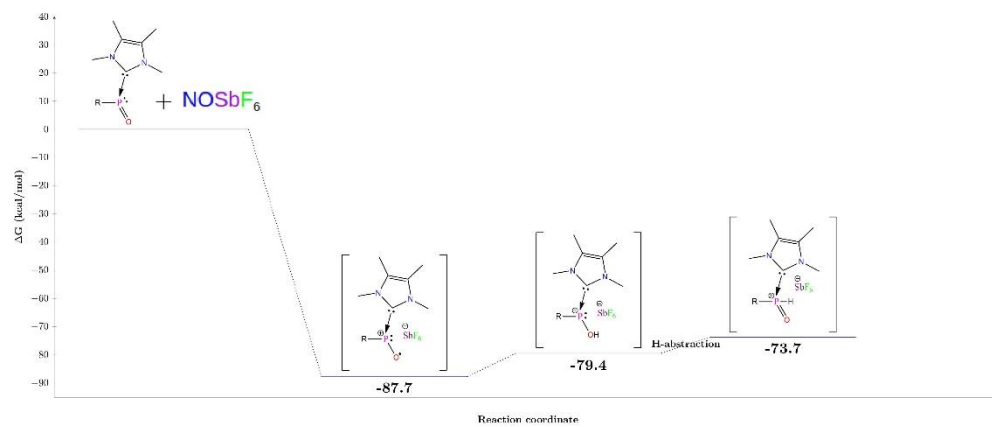

Fig. S47 Reaction free energy profile for 2 to 9 at M06/cc-pVDZ level of theory.

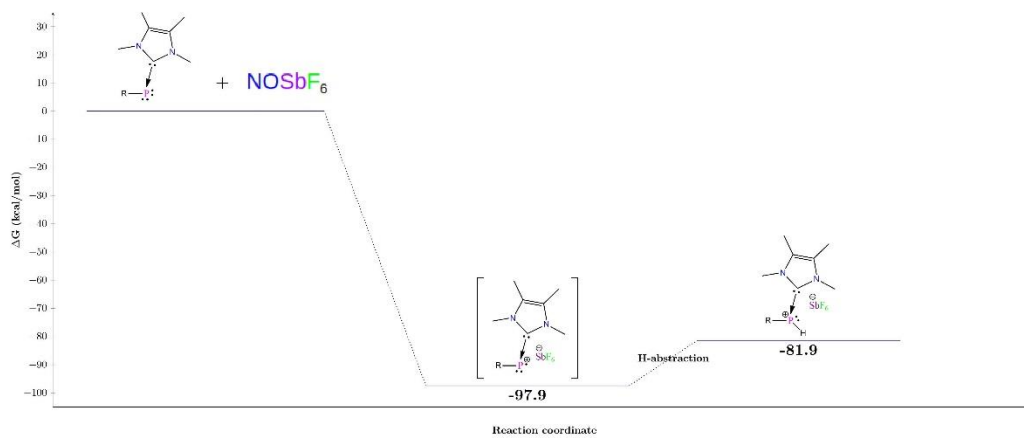

Fig. S48 Reaction free energy profile for 1 to 11 at M06/cc-pVDZ level of theory.

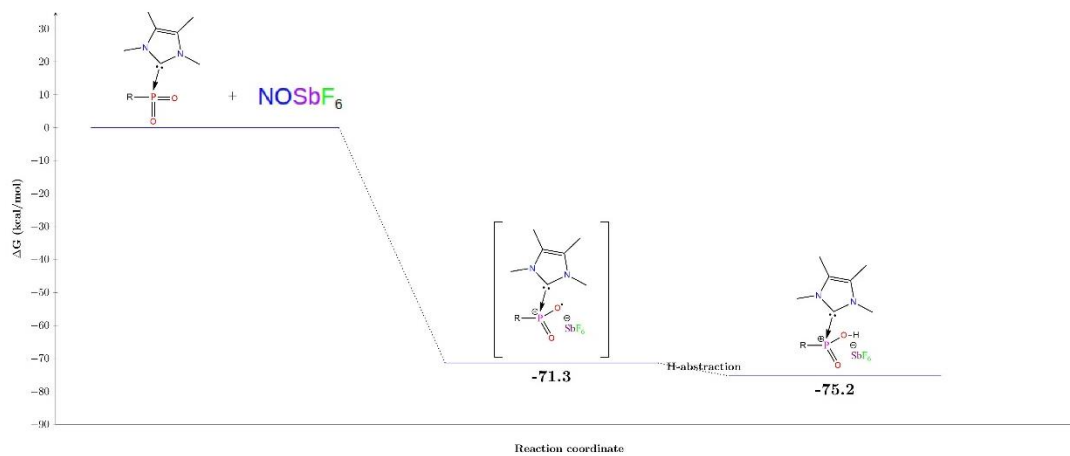

Fig. S49 Reaction free energy profile for 3 to 13 at M06/cc-pVDZ level of theory.

**Coordinates of optimized geometries of radicals (at b3lyp/cc-PVDZ level of theory)**

**Table S18.** Cartesian coordinates and energy values of [7] (with NHC<sup>Me4</sup>)

|    |           |           |           |
|----|-----------|-----------|-----------|
| C  | 0.620889  | -0.939867 | 0.247980  |
| N  | 0.509937  | -2.179038 | -0.288205 |
| C  | 0.172257  | -3.087645 | 0.700540  |
| C  | 0.052066  | -2.377227 | 1.873632  |
| N  | 0.327349  | -1.057840 | 1.566534  |
| C  | -0.044881 | -4.532572 | 0.417397  |
| C  | -0.357568 | -2.817498 | 3.235490  |
| C  | 0.638434  | -2.559883 | -1.698502 |
| C  | 0.119050  | 0.046336  | 2.499992  |
| P  | 0.768177  | 0.660224  | -0.663503 |
| O  | 0.923899  | 0.402042  | -2.174674 |
| H  | -0.199364 | -5.082415 | 1.354265  |
| H  | 0.814870  | -4.980503 | -0.103931 |
| H  | -0.940418 | -4.664169 | -0.210135 |
| H  | -0.470720 | -3.908487 | 3.261659  |
| H  | -1.324965 | -2.366718 | 3.508956  |
| H  | 0.382836  | -2.534072 | 3.999519  |
| H  | -0.959516 | 0.236949  | 2.584050  |
| H  | 0.627990  | 0.939327  | 2.129340  |
| H  | 0.536609  | -0.215956 | 3.478867  |
| H  | -0.317169 | -2.996074 | -2.019035 |
| H  | 1.443447  | -3.298543 | -1.805119 |
| H  | 0.854875  | -1.666699 | -2.288406 |
| F  | -2.671895 | -0.991933 | 1.425627  |
| F  | -5.040885 | -2.042445 | 0.551182  |
| F  | -4.409939 | -1.328144 | -2.025273 |
| F  | -4.379918 | 0.566811  | -0.041791 |
| F  | -2.020698 | -0.304286 | -1.141597 |
| F  | -2.675551 | -2.879894 | -0.576056 |
| Sb | -3.549288 | -1.163882 | -0.304186 |
| C  | 2.125048  | 1.718340  | 0.024540  |
| C  | 1.754579  | 3.064006  | 0.284191  |
| C  | 3.467027  | 1.281128  | 0.158331  |
| C  | 2.748210  | 3.966953  | 0.688766  |
| C  | 4.422897  | 2.220846  | 0.575285  |
| C  | 4.071015  | 3.547235  | 0.834406  |
| H  | 2.475723  | 5.004778  | 0.889022  |
| H  | 5.460722  | 1.900410  | 0.687503  |
| H  | 4.836182  | 4.259417  | 1.150437  |
| C  | 0.324333  | 3.504499  | 0.145881  |
| C  | -0.488869 | 3.647348  | 1.298191  |
| C  | -0.222167 | 3.768866  | -1.136985 |



|   |           |           |           |
|---|-----------|-----------|-----------|
| C | -1.856271 | 3.901580  | 1.134533  |
| C | -1.594108 | 4.033113  | -1.246632 |
| C | -2.438290 | 4.057865  | -0.129973 |
| H | -2.487404 | 3.971552  | 2.025127  |
| H | -2.015133 | 4.214125  | -2.239528 |
| C | 3.910984  | -0.125820 | -0.128361 |
| C | 4.065476  | -1.048224 | 0.930516  |
| C | 4.253729  | -0.503105 | -1.450500 |
| C | 4.494216  | -2.352975 | 0.641038  |
| C | 4.687647  | -1.812998 | -1.689272 |
| C | 4.801561  | -2.759985 | -0.661423 |
| H | 4.600005  | -3.065922 | 1.463640  |
| H | 4.951966  | -2.099367 | -2.711358 |
| C | 0.071137  | 3.579488  | 2.702390  |
| H | 0.327536  | 4.592370  | 3.059084  |
| H | -0.669161 | 3.167796  | 3.404499  |
| H | 0.990789  | 2.984143  | 2.773911  |
| C | -3.931617 | 4.209168  | -0.280479 |
| H | -4.197843 | 4.704702  | -1.226105 |
| H | -4.406968 | 3.212404  | -0.278833 |
| H | -4.368671 | 4.783488  | 0.550990  |
| C | 0.633040  | 3.776063  | -2.384667 |
| H | 1.617392  | 4.232939  | -2.201662 |
| H | 0.811343  | 2.754521  | -2.758222 |
| H | 0.134753  | 4.340990  | -3.185970 |
| C | 3.835605  | -0.654907 | 2.372426  |
| H | 3.635735  | -1.538588 | 2.995785  |
| H | 4.727842  | -0.154359 | 2.787576  |
| H | 3.002407  | 0.050585  | 2.492241  |
| C | 4.186789  | 0.482505  | -2.594052 |
| H | 4.594360  | 0.039011  | -3.514003 |
| H | 3.147186  | 0.786804  | -2.790181 |
| H | 4.760297  | 1.397101  | -2.372446 |
| C | 5.242572  | -4.173045 | -0.959551 |
| H | 6.113458  | -4.187485 | -1.634289 |
| H | 5.509617  | -4.715546 | -0.040709 |
| H | 4.439485  | -4.740595 | -1.460975 |

|                                            |                             |
|--------------------------------------------|-----------------------------|
| Zero-point correction=                     | 0.617472 (Hartree/Particle) |
| Thermal correction to Energy=              | 0.665963                    |
| Thermal correction to Enthalpy=            | 0.666907                    |
| Thermal correction to Gibbs Free Energy=   | 0.530289                    |
| Sum of electronic and zero-point Energies= | -2568.700441                |
| Sum of electronic and thermal Energies=    | -2568.651950                |
| Sum of electronic and thermal Enthalpies=  | -2568.651006                |

Sum of electronic and thermal Free Energies= -2568.787624

**Table S19.** Cartesian coordinates and energy values of [7] (without NHC<sup>Me4</sup>)

|   |           |           |           |
|---|-----------|-----------|-----------|
| P | 0.373151  | 0.548384  | -1.107853 |
| C | 0.792062  | 1.625684  | 0.317934  |
| C | 2.117242  | 1.577599  | 0.818609  |
| C | -0.190625 | 2.476583  | 0.869754  |
| C | 2.435489  | 2.400962  | 1.909665  |
| C | 0.170737  | 3.283775  | 1.958076  |
| C | 1.468581  | 3.241612  | 2.470554  |
| H | 3.446146  | 2.385859  | 2.320893  |
| H | -0.572388 | 3.949862  | 2.400034  |
| H | 1.738237  | 3.876099  | 3.317227  |
| C | 3.188297  | 0.708932  | 0.244435  |
| C | 3.452205  | -0.583979 | 0.819947  |
| C | 4.100671  | 1.265388  | -0.723169 |
| C | 4.562494  | -1.292938 | 0.378960  |
| C | 5.190070  | 0.509440  | -1.122011 |
| C | 5.442220  | -0.775480 | -0.591136 |
| H | 4.764675  | -2.278274 | 0.804290  |
| H | 5.880057  | 0.920803  | -1.862281 |
| C | -1.583981 | 2.524981  | 0.310814  |
| C | -1.866307 | 3.352203  | -0.803384 |
| C | -2.614789 | 1.772397  | 0.918623  |
| C | -3.173518 | 3.388770  | -1.304060 |
| C | -3.905534 | 1.835489  | 0.375064  |
| C | -4.206919 | 2.630946  | -0.736377 |
| H | -3.389656 | 4.030377  | -2.162927 |
| H | -4.697518 | 1.240440  | 0.837660  |
| 6 | 2.538975  | -1.174356 | 1.857890  |
| H | 2.295916  | -0.449092 | 2.649060  |
| H | 1.586323  | -1.487649 | 1.402377  |
| H | 2.998561  | -2.058015 | 2.321145  |
| C | 3.867452  | 2.635195  | -1.297446 |
| H | 2.901344  | 2.680729  | -1.825949 |
| H | 3.834252  | 3.404209  | -0.509428 |
| H | 4.659998  | 2.901038  | -2.009589 |
| C | 6.625491  | -1.566506 | -1.064435 |
| H | 6.807584  | -2.449196 | -0.436663 |
| H | 6.459466  | -1.912005 | -2.100402 |
| H | 7.534479  | -0.944164 | -1.083488 |
| C | -0.793572 | 4.198920  | -1.450600 |
| H | -0.267728 | 4.825447  | -0.712628 |
| H | -0.023407 | 3.582629  | -1.945104 |
| H | -1.226281 | 4.859264  | -2.215259 |

|    |           |           |           |
|----|-----------|-----------|-----------|
| C  | -5.598101 | 2.657585  | -1.322169 |
| H  | -6.356251 | 2.378063  | -0.575401 |
| H  | -5.850050 | 3.653884  | -1.717174 |
| H  | -5.684729 | 1.944762  | -2.161079 |
| C  | -2.366723 | 0.932169  | 2.150065  |
| H  | -1.429888 | 0.364574  | 2.079829  |
| H  | -2.302467 | 1.563505  | 3.053071  |
| H  | -3.182447 | 0.211297  | 2.299817  |
| O  | 1.733997  | -0.107057 | -1.429991 |
| Sb | -1.521502 | -2.609542 | -0.044071 |
| F  | -0.864201 | -2.547526 | -1.856979 |
| F  | -2.488606 | -4.243459 | -0.339852 |
| F  | 0.069068  | -3.551143 | 0.508422  |
| F  | -2.079976 | -2.485352 | 1.796462  |
| F  | -0.470537 | -0.902350 | 0.253136  |
| F  | -3.022234 | -1.517871 | -0.558557 |

|                                              |                             |
|----------------------------------------------|-----------------------------|
| Zero-point correction=                       | 0.430699 (Hartree/Particle) |
| Thermal correction to Energy=                | 0.467458                    |
| Thermal correction to Enthalpy=              | 0.468402                    |
| Thermal correction to Gibbs Free Energy=     | 0.357892                    |
| Sum of electronic and zero-point Energies=   | -2185.339205                |
| Sum of electronic and thermal Energies=      | -2185.302447                |
| Sum of electronic and thermal Enthalpies=    | -2185.301503                |
| Sum of electronic and thermal Free Energies= | -2185.412013                |

**Table S20.** Cartesian coordinates and energy values of [12] (with NHC<sup>Me4</sup>)

|   |           |           |           |
|---|-----------|-----------|-----------|
| C | -0.614333 | -1.103812 | 0.048553  |
| N | -0.127971 | -1.288560 | 1.298021  |
| C | 0.423470  | -2.550956 | 1.410788  |
| C | 0.248651  | -3.163286 | 0.192033  |
| F | -0.398859 | -2.256138 | -0.626401 |
| C | 1.157223  | -3.008571 | 2.622845  |
| C | 0.748902  | -4.478286 | -0.295585 |
| C | -0.009205 | -0.262437 | 2.330656  |
| C | -0.622944 | -2.502810 | -2.053953 |
| P | -1.011762 | 0.543452  | -0.719067 |
| O | 0.277709  | 1.345006  | -0.281759 |
| O | -1.391842 | 0.340485  | -2.176046 |
| H | 1.529254  | -4.029230 | 2.471634  |
| H | 0.524396  | -3.000575 | 3.525585  |
| H | 2.028492  | -2.355503 | 2.785071  |
| H | 1.021238  | -5.117198 | 0.554407  |
| H | 1.660484  | -4.326988 | -0.896215 |
| H | 0.000414  | -5.012561 | -0.899531 |

|    |           |           |           |
|----|-----------|-----------|-----------|
| H  | 0.357723  | -2.632943 | -2.532103 |
| H  | -1.125010 | -1.632808 | -2.486657 |
| H  | -1.229763 | -3.410794 | -2.172542 |
| H  | 0.987552  | 0.190396  | 2.254151  |
| H  | -0.145957 | -0.731195 | 3.313174  |
| H  | -0.787514 | 0.489804  | 2.183248  |
| Sb | 3.754474  | -0.977772 | -0.178002 |
| F  | 2.825522  | -0.509894 | 1.485891  |
| F  | 5.408442  | -1.055109 | 0.801767  |
| F  | 4.005614  | 0.910003  | -0.539744 |
| F  | 3.378196  | -2.845529 | 0.242250  |
| F  | 4.632723  | -1.474644 | -1.815643 |
| F  | 2.043174  | -0.948846 | -1.113877 |
| C  | -2.311230 | 1.519225  | 0.157190  |
| C  | -1.907256 | 2.852921  | 0.421365  |
| C  | -3.641684 | 1.107601  | 0.391654  |
| C  | -2.842384 | 3.765588  | 0.928868  |
| C  | -4.544408 | 2.044617  | 0.922135  |
| C  | -4.153720 | 3.358778  | 1.182873  |
| H  | -2.542220 | 4.798051  | 1.121153  |
| H  | -5.572550 | 1.731914  | 1.117483  |
| H  | -4.876605 | 4.073399  | 1.582694  |
| C  | -0.497312 | 3.305709  | 0.145453  |
| C  | 0.409807  | 3.540140  | 1.246285  |
| C  | -0.123604 | 3.766527  | -1.178396 |
| C  | 1.714736  | 3.885235  | 0.955906  |
| C  | 1.195551  | 4.133823  | -1.398566 |
| C  | 2.154779  | 4.106071  | -0.370865 |
| H  | 2.440396  | 3.961632  | 1.769015  |
| H  | 1.508848  | 4.399253  | -2.410744 |
| C  | -4.128572 | -0.284944 | 0.097354  |
| C  | -4.182238 | -1.248083 | 1.128595  |
| C  | -4.606380 | -0.607687 | -1.196570 |
| C  | -4.657000 | -2.535593 | 0.837949  |
| C  | -5.079611 | -1.903255 | -1.436199 |
| C  | -5.105168 | -2.886619 | -0.438648 |
| H  | -4.685275 | -3.279916 | 1.638958  |
| H  | -5.446142 | -2.148044 | -2.437499 |
| C  | -3.785428 | -0.913686 | 2.549013  |
| H  | -2.846559 | -0.344797 | 2.600183  |
| H  | -4.552649 | -0.291184 | 3.041217  |
| H  | -3.667286 | -1.827066 | 3.150359  |
| C  | -5.622333 | -4.273538 | -0.737854 |
| H  | -5.058095 | -4.743539 | -1.560719 |
| H  | -5.549772 | -4.931583 | 0.140646  |

|   |           |           |           |
|---|-----------|-----------|-----------|
| H | -6.679686 | -4.245768 | -1.051165 |
| C | -4.621281 | 0.412840  | -2.309018 |
| H | -5.114070 | 1.347297  | -1.995564 |
| H | -3.591417 | 0.661478  | -2.610284 |
| H | -5.156999 | 0.024083  | -3.187297 |
| C | -0.032416 | 3.377441  | 2.676376  |
| H | -0.618525 | 4.252862  | 3.007200  |
| H | -0.681720 | 2.503402  | 2.820093  |
| H | 0.834841  | 3.286270  | 3.345467  |
| C | 3.615110  | 4.247568  | -0.664563 |
| H | 4.147292  | 4.785422  | 0.135336  |
| H | 4.042335  | 3.227294  | -0.717801 |
| H | 3.800356  | 4.746696  | -1.626588 |
| C | -1.111865 | 3.752904  | -2.310425 |
| H | -1.317278 | 2.717023  | -2.632422 |
| H | -2.074568 | 4.200541  | -2.017585 |
| H | -0.715011 | 4.304046  | -3.174425 |

|                                              |                             |
|----------------------------------------------|-----------------------------|
| Zero-point correction=                       | 0.622276 (Hartree/Particle) |
| Thermal correction to Energy=                | 0.670993                    |
| Thermal correction to Enthalpy=              | 0.671937                    |
| Thermal correction to Gibbs Free Energy=     | 0.537031                    |
| Sum of electronic and zero-point Energies=   | -2643.888260                |
| Sum of electronic and thermal Energies=      | -2643.839544                |
| Sum of electronic and thermal Enthalpies=    | -2643.838599                |
| Sum of electronic and thermal Free Energies= | -2643.973505                |

**Table S21.** Cartesian coordinates and energy values of [12] (without NHC<sup>Me4</sup>)

|   |           |           |           |
|---|-----------|-----------|-----------|
| C | -0.212082 | -1.675314 | 0.382838  |
| C | -1.490884 | -1.892320 | 0.934955  |
| C | 0.949466  | -2.222333 | 0.969142  |
| C | -1.615003 | -2.675615 | 2.090598  |
| C | 0.788013  | -2.995710 | 2.129720  |
| C | -0.474334 | -3.222761 | 2.681796  |
| H | -2.601038 | -2.855307 | 2.524674  |
| H | 1.675590  | -3.422613 | 2.600809  |
| H | -0.571854 | -3.830462 | 3.584201  |
| C | -2.729972 | -1.325554 | 0.300740  |
| C | -3.358488 | -0.157983 | 0.888500  |
| C | -3.474947 | -2.142286 | -0.640015 |
| C | -4.619156 | 0.207199  | 0.444999  |
| C | -4.732788 | -1.726190 | -1.027514 |
| C | -5.320185 | -0.543753 | -0.518708 |
| H | -5.084783 | 1.103856  | 0.859612  |
| H | -5.290616 | -2.323060 | -1.753062 |

|    |           |           |           |
|----|-----------|-----------|-----------|
| C  | 2.326418  | -1.994093 | 0.416138  |
| C  | 2.833949  | -2.844481 | -0.592458 |
| C  | 3.127695  | -0.960588 | 0.949060  |
| C  | 4.138048  | -2.638329 | -1.053763 |
| C  | 4.422223  | -0.784451 | 0.442254  |
| C  | 4.946590  | -1.608117 | -0.558330 |
| H  | 4.528914  | -3.298092 | -1.833701 |
| H  | 5.034525  | 0.027017  | 0.844931  |
| C  | -2.653781 | 0.640640  | 1.941733  |
| H  | -2.399397 | 0.017645  | 2.814527  |
| H  | -1.710538 | 1.060171  | 1.565563  |
| H  | -3.278946 | 1.478011  | 2.279267  |
| C  | -2.865844 | -3.390558 | -1.212346 |
| H  | -1.985013 | -3.145403 | -1.829299 |
| H  | -2.521398 | -4.076829 | -0.423004 |
| H  | -3.585904 | -3.921324 | -1.850066 |
| C  | -6.660538 | -0.091867 | -1.017524 |
| H  | -7.159194 | 0.579508  | -0.303910 |
| H  | -6.535706 | 0.466644  | -1.963502 |
| H  | -7.322106 | -0.944784 | -1.233567 |
| C  | 1.992935  | -3.943073 | -1.198631 |
| H  | 1.471354  | -4.541081 | -0.434355 |
| H  | 1.230685  | -3.507291 | -1.864960 |
| H  | 2.612697  | -4.625142 | -1.798817 |
| C  | 6.330821  | -1.374774 | -1.113427 |
| H  | 6.982993  | -0.876997 | -0.379709 |
| H  | 6.810224  | -2.319034 | -1.415575 |
| H  | 6.290724  | -0.728377 | -2.007826 |
| C  | 2.643907  | -0.062447 | 2.064141  |
| H  | 1.588427  | 0.217510  | 1.957358  |
| H  | 2.754227  | -0.554860 | 3.046866  |
| H  | 3.223880  | 0.870205  | 2.086513  |
| O  | -1.715065 | -0.243373 | -1.291097 |
| Sb | 0.501256  | 2.918624  | -0.046146 |
| F  | 0.742781  | 3.147656  | -1.927483 |
| F  | 0.450676  | 4.770539  | 0.407944  |
| F  | -1.394512 | 2.738479  | -0.302115 |
| F  | 0.230932  | 2.277384  | 1.758274  |
| F  | 0.559087  | 0.796491  | -0.478596 |
| F  | 2.389608  | 2.704779  | 0.200371  |
| P  | -0.236489 | -0.695405 | -1.143333 |
| O  | 0.623316  | -1.086385 | -2.298710 |

Zero-point correction= 0.436262 (Hartree/Particle)

Thermal correction to Energy= 0.474347

|                                              |              |
|----------------------------------------------|--------------|
| Thermal correction to Enthalpy=              | 0.475291     |
| Thermal correction to Gibbs Free Energy=     | 0.360941     |
| Sum of electronic and zero-point Energies=   | -2260.548575 |
| Sum of electronic and thermal Energies=      | -2260.510489 |
| Sum of electronic and thermal Enthalpies=    | -2260.509545 |
| Sum of electronic and thermal Free Energies= | -2260.623895 |

**Table S22.** Cartesian coordinates and energy values of [10] (with NHC<sup>Me<sub>4</sub></sup>)

|    |           |           |           |
|----|-----------|-----------|-----------|
| C  | 0.959665  | 0.574130  | 1.442883  |
| N  | 1.210732  | 1.746880  | 2.080956  |
| C  | 0.143257  | 2.079200  | 2.900457  |
| C  | -0.792296 | 1.075710  | 2.764946  |
| N  | -0.259600 | 0.155823  | 1.875628  |
| C  | 0.128186  | 3.312837  | 3.736740  |
| C  | -2.132297 | 0.918178  | 3.399101  |
| C  | 2.474215  | 2.480738  | 2.063402  |
| C  | -0.927860 | -1.070536 | 1.427132  |
| P  | 2.077072  | -0.521541 | 0.480960  |
| H  | -0.800479 | 3.362974  | 4.318594  |
| H  | 0.189315  | 4.221141  | 3.115855  |
| H  | 0.972925  | 3.332196  | 4.443715  |
| H  | -2.369518 | 1.806690  | 3.997958  |
| H  | -2.156900 | 0.043579  | 4.069598  |
| H  | -2.916195 | 0.787870  | 2.638361  |
| H  | -0.234410 | -1.917263 | 1.513961  |
| H  | -1.264151 | -0.966418 | 0.388611  |
| H  | -1.801467 | -1.255163 | 2.058041  |
| H  | 2.274952  | 3.553586  | 1.962389  |
| H  | 3.077486  | 2.144876  | 1.215826  |
| H  | 3.021176  | 2.298596  | 3.000021  |
| F  | -3.840700 | 0.233897  | 0.693066  |
| F  | -6.295467 | -0.974446 | 0.820082  |
| F  | -3.999170 | -2.397429 | 1.360752  |
| F  | -5.445711 | -2.897992 | -0.935660 |
| F  | -5.233760 | -0.229892 | -1.610457 |
| F  | -2.991290 | -1.698511 | -1.079366 |
| Sb | -4.650646 | -1.335314 | -0.125772 |
| C  | 2.781878  | 0.494082  | -0.883922 |
| C  | 4.116875  | 0.123914  | -1.226585 |
| C  | 2.074976  | 1.428534  | -1.700964 |
| C  | 4.740628  | 0.724397  | -2.327491 |
| C  | 2.745338  | 2.000046  | -2.793728 |
| C  | 4.064661  | 1.666551  | -3.103071 |
| H  | 5.766291  | 0.442382  | -2.574068 |
| H  | 2.206074  | 2.709744  | -3.424278 |

|   |           |           |           |
|---|-----------|-----------|-----------|
| H | 4.558492  | 2.128660  | -3.960415 |
| C | 0.633005  | 1.807862  | -1.512218 |
| C | -0.393840 | 0.896120  | -1.863546 |
| C | 0.288592  | 3.118716  | -1.100683 |
| C | -1.732865 | 1.290767  | -1.734960 |
| C | -1.064724 | 3.465188  | -0.980097 |
| C | -2.093176 | 2.566218  | -1.284580 |
| H | -2.515379 | 0.574810  | -1.989394 |
| H | -1.318690 | 4.474693  | -0.642234 |
| C | 4.878819  | -0.925000 | -0.460740 |
| C | 5.741540  | -0.572029 | 0.600338  |
| C | 4.783209  | -2.281710 | -0.869162 |
| C | 6.466065  | -1.581945 | 1.254516  |
| C | 5.519460  | -3.252825 | -0.183933 |
| C | 6.365251  | -2.926298 | 0.887275  |
| H | 7.134958  | -1.300824 | 2.073095  |
| H | 5.437848  | -4.296272 | -0.501900 |
| C | -0.095190 | -0.470516 | -2.441656 |
| H | 0.528969  | -1.086235 | -1.774732 |
| H | -1.027995 | -1.023090 | -2.616700 |
| H | 0.451613  | -0.388937 | -3.396203 |
| C | 1.327372  | 4.186999  | -0.832176 |
| H | 0.984042  | 4.880442  | -0.049438 |
| H | 2.299127  | 3.775355  | -0.532890 |
| H | 1.507264  | 4.790966  | -1.738727 |
| C | -3.543765 | 2.964280  | -1.151705 |
| H | -4.207539 | 2.101299  | -1.293496 |
| H | -3.747763 | 3.393211  | -0.156966 |
| H | -3.811575 | 3.736448  | -1.893682 |
| C | 5.910299  | 0.856892  | 1.065713  |
| H | 5.719731  | 1.585057  | 0.265681  |
| H | 5.219173  | 1.087042  | 1.894599  |
| H | 6.928954  | 1.023899  | 1.446757  |
| C | 3.905047  | -2.692782 | -2.029035 |
| H | 2.840888  | -2.479286 | -1.832839 |
| H | 4.168920  | -2.151026 | -2.951401 |
| H | 3.998026  | -3.770083 | -2.226627 |
| C | 7.141689  | -4.001199 | 1.609048  |
| H | 6.463817  | -4.687694 | 2.144464  |
| H | 7.724927  | -4.615337 | 0.903386  |
| H | 7.836868  | -3.572410 | 2.345460  |

|                                 |                             |
|---------------------------------|-----------------------------|
| Zero-point correction=          | 0.613468 (Hartree/Particle) |
| Thermal correction to Energy=   | 0.661074                    |
| Thermal correction to Enthalpy= | 0.662018                    |



|                                              |              |
|----------------------------------------------|--------------|
| Thermal correction to Gibbs Free Energy=     | 0.526070     |
| Sum of electronic and zero-point Energies=   | -2493.474228 |
| Sum of electronic and thermal Energies=      | -2493.426623 |
| Sum of electronic and thermal Enthalpies=    | -2493.425679 |
| Sum of electronic and thermal Free Energies= | -2493.561627 |

**Table S23.** Cartesian coordinates and energy values of [10] (without NHC<sup>Me4</sup>)

|   |           |           |           |
|---|-----------|-----------|-----------|
| P | -1.200861 | 1.176093  | -1.070014 |
| C | -1.995475 | 0.740157  | 0.485159  |
| C | -1.766431 | 1.926415  | 1.207163  |
| C | -2.695849 | -0.356785 | 1.032195  |
| C | -2.213898 | 2.082036  | 2.511801  |
| C | -3.140250 | -0.186243 | 2.352696  |
| C | -2.905968 | 0.996805  | 3.075954  |
| H | -2.040417 | 2.998595  | 3.078226  |
| H | -3.684519 | -1.001464 | 2.834483  |
| H | -3.273564 | 1.070667  | 4.101311  |
| C | -1.009483 | 2.847084  | 0.268827  |
| C | 0.444874  | 2.933164  | 0.357287  |
| C | -1.734266 | 3.870541  | -0.482574 |
| C | 1.103273  | 3.862814  | -0.440023 |
| C | -1.007964 | 4.773294  | -1.242500 |
| C | 0.403853  | 4.777542  | -1.247627 |
| H | 2.193853  | 3.898116  | -0.416902 |
| H | -1.542285 | 5.515050  | -1.839177 |
| C | -2.954670 | -1.609629 | 0.254463  |
| C | -4.210768 | -1.804655 | -0.366625 |
| C | -1.945642 | -2.593216 | 0.145759  |
| C | -4.432972 | -2.984882 | -1.087525 |
| C | -2.216467 | -3.760537 | -0.583196 |
| C | -3.451339 | -3.978553 | -1.205432 |
| H | -5.402336 | -3.129736 | -1.573183 |
| H | -1.434110 | -4.520356 | -0.664922 |
| G | 1.211779  | 2.063880  | 1.304468  |
| H | 1.134192  | 2.493153  | 2.319638  |
| H | 0.818449  | 1.041548  | 1.361744  |
| H | 2.270991  | 2.011944  | 1.026760  |
| C | -3.231274 | 3.946668  | -0.417492 |
| H | -3.702985 | 2.962077  | -0.552338 |
| H | -3.541614 | 4.310019  | 0.576961  |
| H | -3.623144 | 4.635988  | -1.176240 |
| C | 1.143219  | 5.753935  | -2.111386 |
| H | 2.188066  | 5.872204  | -1.795027 |
| H | 1.144328  | 5.389805  | -3.154244 |
| H | 0.646264  | 6.735510  | -2.116431 |

|    |           |           |           |
|----|-----------|-----------|-----------|
| C  | -5.304514 | -0.764501 | -0.274278 |
| H  | -5.642638 | -0.618987 | 0.764733  |
| H  | -4.962085 | 0.219276  | -0.634970 |
| H  | -6.177236 | -1.060424 | -0.873678 |
| C  | -3.730366 | -5.254503 | -1.963380 |
| H  | -2.799226 | -5.757057 | -2.264693 |
| H  | -4.303248 | -5.965481 | -1.342367 |
| H  | -4.328765 | -5.062821 | -2.867802 |
| C  | -0.593763 | -2.406183 | 0.791832  |
| H  | -0.058149 | -1.542593 | 0.372159  |
| H  | -0.681460 | -2.231213 | 1.876574  |
| H  | 0.047106  | -3.283875 | 0.634265  |
| Sb | 3.262491  | -1.164625 | 0.039053  |
| F  | 4.169194  | -1.285877 | -1.664291 |
| F  | 4.793432  | -1.929841 | 0.937777  |
| F  | 4.000851  | 0.613203  | 0.301478  |
| F  | 2.328762  | -1.025127 | 1.735988  |
| F  | 1.714936  | -0.377598 | -0.842857 |
| F  | 2.524664  | -2.936244 | -0.224736 |

|                                              |                             |
|----------------------------------------------|-----------------------------|
| Zero-point correction=                       | 0.427612 (Hartree/Particle) |
| Thermal correction to Energy=                | 0.463255                    |
| Thermal correction to Enthalpy=              | 0.464200                    |
| Thermal correction to Gibbs Free Energy=     | 0.354428                    |
| Sum of electronic and zero-point Energies=   | -2110.092477                |
| Sum of electronic and thermal Energies=      | -2110.056833                |
| Sum of electronic and thermal Enthalpies=    | -2110.055889                |
| Sum of electronic and thermal Free Energies= | -2110.165660                |

**Table S24.** Cartesian coordinates and energy values of [4] (with NHC<sup>Me4</sup>)

|   |           |           |           |
|---|-----------|-----------|-----------|
| C | 2.275030  | 3.174512  | 0.057999  |
| N | 1.076677  | 2.478245  | 0.229196  |
| C | 0.993914  | 1.433934  | -0.646068 |
| N | 2.133012  | 1.494719  | -1.385739 |
| C | 2.942502  | 2.551370  | -0.962389 |
| C | 2.478514  | 0.564894  | -2.458770 |
| C | 0.020498  | 2.838627  | 1.164567  |
| P | -0.629186 | 0.483150  | -0.983481 |
| O | -0.335774 | -0.320103 | -2.334971 |
| C | 4.271239  | 2.838533  | -1.577624 |
| C | 2.654738  | 4.353765  | 0.890022  |
| C | -0.721880 | -0.594444 | 0.505046  |
| C | 0.376556  | -1.228764 | 1.247245  |
| C | 0.146753  | -1.683829 | 2.549311  |
| C | -1.123473 | -1.658779 | 3.156930  |

|   |           |           |           |
|---|-----------|-----------|-----------|
| C | -2.221355 | -1.209868 | 2.381654  |
| C | -2.055136 | -0.716679 | 1.090572  |
| C | 1.742345  | -1.492748 | 0.696787  |
| C | 1.941576  | -2.416283 | -0.372116 |
| C | 3.238158  | -2.738651 | -0.786891 |
| C | 4.381966  | -2.172866 | -0.196792 |
| C | 4.178930  | -1.262309 | 0.844816  |
| C | 2.896181  | -0.917131 | 1.303241  |
| C | -3.307928 | -0.361192 | 0.343088  |
| C | -3.752234 | -1.134387 | -0.768679 |
| C | -4.962815 | -0.822002 | -1.397055 |
| C | -5.774966 | 0.246242  | -0.978138 |
| C | -5.335702 | 0.993242  | 0.117824  |
| C | -4.132180 | 0.710389  | 0.786385  |
| C | -2.951148 | -2.305639 | -1.284400 |
| C | -7.068450 | 0.563614  | -1.691168 |
| C | -3.754683 | 1.577704  | 1.968735  |
| C | 0.771271  | -3.083266 | -1.048815 |
| C | 5.766889  | -2.540254 | -0.675882 |
| C | 2.794802  | 0.069202  | 2.447345  |
| H | 0.983208  | -2.137382 | 3.092945  |
| H | -1.273572 | -2.072419 | 4.157387  |
| H | -3.236321 | -1.292166 | 2.785242  |
| H | -5.291121 | -1.441979 | -2.238349 |
| H | -5.946339 | 1.832263  | 0.468543  |
| H | -4.093708 | 1.145264  | 2.926877  |
| H | -4.216093 | 2.575167  | 1.884762  |
| H | -2.665754 | 1.697391  | 2.053038  |
| H | -2.058997 | -1.951460 | -1.826937 |
| H | -3.559695 | -2.927728 | -1.959728 |
| H | -2.587198 | -2.937054 | -0.458422 |
| H | -7.606632 | 1.389987  | -1.202136 |
| H | -7.743534 | -0.309640 | -1.715633 |
| H | -6.893311 | 0.854831  | -2.742023 |
| H | 3.362053  | -3.471423 | -1.591997 |
| H | 5.049042  | -0.800075 | 1.323771  |
| H | 0.196622  | -2.329197 | -1.614137 |
| H | 0.083273  | -3.529840 | -0.311365 |
| H | 1.113057  | -3.877082 | -1.732493 |
| H | 5.940889  | -3.629363 | -0.621128 |
| H | 6.545853  | -2.046846 | -0.074372 |
| H | 5.926107  | -2.250197 | -1.729755 |
| H | 1.922549  | 0.728403  | 2.334879  |
| H | 3.701911  | 0.691892  | 2.506560  |
| H | 2.681237  | -0.431041 | 3.425310  |

|   |           |           |           |
|---|-----------|-----------|-----------|
| H | 1.536856  | 0.087000  | -2.775430 |
| H | 3.178806  | -0.198295 | -2.089172 |
| H | 2.943761  | 1.122371  | -3.284038 |
| H | 4.936112  | 1.960288  | -1.531853 |
| H | 4.765804  | 3.664855  | -1.049662 |
| H | 4.180400  | 3.126712  | -2.638401 |
| H | 1.967662  | 5.203880  | 0.741953  |
| H | 3.664198  | 4.694483  | 0.623516  |
| H | 2.653928  | 4.111409  | 1.965524  |
| H | -0.947287 | 2.623464  | 0.689510  |
| H | 0.089117  | 3.907834  | 1.398930  |
| H | 0.093796  | 2.256885  | 2.095402  |

|                                              |                             |
|----------------------------------------------|-----------------------------|
| Zero-point correction=                       | 0.597169 (Hartree/Particle) |
| Thermal correction to Energy=                | 0.635021                    |
| Thermal correction to Enthalpy=              | 0.635966                    |
| Thermal correction to Gibbs Free Energy=     | 0.526811                    |
| Sum of electronic and zero-point Energies=   | -1729.227583                |
| Sum of electronic and thermal Energies=      | -1729.189731                |
| Sum of electronic and thermal Enthalpies=    | -1729.188786                |
| Sum of electronic and thermal Free Energies= | -1729.297941                |

**Table S25.** Cartesian coordinates and energy values of [4] (without NHC<sup>Me4</sup>)

|   |           |           |           |
|---|-----------|-----------|-----------|
| P | 0.005878  | -0.931986 | -1.320770 |
| O | 0.059771  | -2.424222 | -0.731085 |
| C | -0.001549 | 0.187743  | 0.228126  |
| C | 1.215853  | 0.617262  | 0.816136  |
| C | 1.200543  | 1.422522  | 1.969179  |
| C | -0.006450 | 1.817079  | 2.549754  |
| C | -1.210675 | 1.416539  | 1.968221  |
| C | -1.221660 | 0.611545  | 0.814403  |
| C | 2.562312  | 0.253700  | 0.245611  |
| C | 3.192335  | -0.960243 | 0.611845  |
| C | 4.480833  | -1.234113 | 0.134274  |
| C | 5.170783  | -0.343654 | -0.700876 |
| C | 4.529372  | 0.848191  | -1.055700 |
| C | 3.241173  | 1.163720  | -0.594814 |
| C | -2.566893 | 0.242463  | 0.244312  |
| C | -3.171671 | -0.996116 | 0.569929  |
| C | -4.460640 | -1.273915 | 0.095873  |
| C | -5.175777 | -0.364626 | -0.696776 |
| C | -4.559520 | 0.851181  | -1.011872 |
| C | -3.271983 | 1.172061  | -0.552404 |
| C | -2.427124 | -2.031443 | 1.377846  |
| C | -6.565052 | -0.695996 | -1.190327 |

|   |           |           |           |
|---|-----------|-----------|-----------|
| C | -2.652384 | 2.495224  | -0.942744 |
| C | 2.470238  | -1.976268 | 1.463558  |
| C | 6.560500  | -0.669179 | -1.197209 |
| C | 2.590894  | 2.457369  | -1.029958 |
| H | 2.148385  | 1.740905  | 2.412576  |
| H | -0.008425 | 2.439446  | 3.448323  |
| H | -2.160295 | 1.728779  | 2.412159  |
| H | -4.919865 | -2.233617 | 0.353877  |
| H | -5.093248 | 1.575946  | -1.634258 |
| H | -2.422629 | 3.118569  | -0.063445 |
| H | -3.324705 | 3.067257  | -1.599187 |
| H | -1.698774 | 2.345087  | -1.476219 |
| H | -1.556367 | -2.390282 | 0.797949  |
| H | -3.078472 | -2.884554 | 1.622522  |
| H | -2.040297 | -1.611796 | 2.321177  |
| H | -6.982777 | 0.120068  | -1.798696 |
| H | -7.256981 | -0.879266 | -0.350608 |
| H | -6.565069 | -1.610863 | -1.806994 |
| H | 4.959362  | -2.175580 | 0.422637  |
| H | 5.043351  | 1.557453  | -1.711677 |
| H | 1.592801  | -2.353254 | 0.906537  |
| H | 2.098988  | -1.533513 | 2.402499  |
| H | 3.130231  | -2.819708 | 1.718254  |
| H | 7.267586  | -0.795103 | -0.359504 |
| H | 6.951796  | 0.124376  | -1.851217 |
| H | 6.572795  | -1.613516 | -1.767505 |
| H | 1.651536  | 2.263107  | -1.574939 |
| H | 3.256591  | 3.031685  | -1.691141 |
| H | 2.327393  | 3.095671  | -0.171206 |

|                                              |                             |
|----------------------------------------------|-----------------------------|
| Zero-point correction=                       | 0.416259 (Hartree/Particle) |
| Thermal correction to Energy=                | 0.443039                    |
| Thermal correction to Enthalpy=              | 0.443983                    |
| Thermal correction to Gibbs Free Energy=     | 0.356563                    |
| Sum of electronic and zero-point Energies=   | -1345.971153                |
| Sum of electronic and thermal Energies=      | -1345.944373                |
| Sum of electronic and thermal Enthalpies=    | -1345.943429                |
| Sum of electronic and thermal Free Energies= | -1346.030848                |

**Coordinates of optimized geometries of other molecules: (at M06/cc-pVDZ level)**

**Table S26.** Cartesian coordinates and energy values of **1**

|   |           |           |           |
|---|-----------|-----------|-----------|
| P | -0.558818 | 0.259228  | -1.148985 |
| N | 2.017687  | 1.409696  | -1.432802 |
| N | 1.057917  | 2.011972  | 0.417152  |
| C | -0.777813 | -0.707662 | 0.428711  |
| C | 0.287110  | -1.374575 | 1.096487  |
| C | 0.031604  | -2.118163 | 2.254172  |
| H | 0.870624  | -2.620152 | 2.748771  |
| C | -1.258351 | -2.271032 | 2.749117  |
| H | -1.441572 | -2.868374 | 3.646046  |
| C | -2.313938 | -1.681456 | 2.063551  |
| H | -3.343322 | -1.816464 | 2.413224  |
| C | -2.094035 | -0.909808 | 0.918807  |
| C | -3.292227 | -0.344981 | 0.230395  |
| C | -3.770518 | -0.941835 | -0.952251 |
| C | -4.904431 | -0.415205 | -1.570879 |
| H | -5.273545 | -0.888653 | -2.488597 |
| C | -5.581519 | 0.690249  | -1.056660 |
| C | -5.109533 | 1.249117  | 0.129037  |
| H | -5.637028 | 2.106663  | 0.564092  |
| C | -3.986322 | 0.743591  | 0.787255  |
| C | -3.570061 | 1.354586  | 2.094012  |
| H | -3.945510 | 2.385356  | 2.188415  |
| H | -2.477646 | 1.363993  | 2.220387  |
| H | -3.970558 | 0.783058  | 2.950044  |
| C | -3.088198 | -2.134064 | -1.555573 |
| H | -2.167806 | -1.837537 | -2.090697 |
| H | -3.744341 | -2.638514 | -2.280822 |
| H | -2.787279 | -2.867666 | -0.790052 |
| C | -6.769656 | 1.264955  | -1.766983 |
| H | -7.428961 | 1.814836  | -1.077674 |
| H | -7.366558 | 0.480236  | -2.258024 |
| H | -6.460183 | 1.973148  | -2.555309 |
| C | 1.686315  | -1.414392 | 0.569387  |
| C | 1.977318  | -2.222354 | -0.553683 |
| C | 3.280422  | -2.264241 | -1.045909 |
| H | 3.493890  | -2.892804 | -1.919748 |
| C | 4.319846  | -1.535898 | -0.461560 |
| C | 4.027705  | -0.795968 | 0.679704  |
| H | 4.832030  | -0.242658 | 1.181084  |
| C | 2.737701  | -0.747833 | 1.221934  |
| C | 0.914202  | -3.040387 | -1.220016 |
| H | 0.279842  | -3.562276 | -0.484976 |
| H | 1.356058  | -3.790354 | -1.893309 |
| H | 0.242526  | -2.393054 | -1.812685 |
| C | 5.702195  | -1.579856 | -1.041287 |
| H | 6.110385  | -2.604655 | -1.035337 |
| H | 6.400558  | -0.940166 | -0.479936 |

|   |           |           |           |
|---|-----------|-----------|-----------|
| H | 5.711951  | -1.246880 | -2.093998 |
| C | 2.537006  | -0.015037 | 2.516559  |
| H | 1.545629  | 0.453657  | 2.592371  |
| H | 3.308239  | 0.760153  | 2.655128  |
| H | 2.617517  | -0.702759 | 3.377044  |
| C | 0.896380  | 1.210272  | -0.679637 |
| C | 2.880875  | 2.299532  | -0.801434 |
| C | 2.281808  | 2.677620  | 0.361217  |
| C | 2.301483  | 0.724843  | -2.671662 |
| H | 1.576779  | -0.099009 | -2.766674 |
| H | 3.322734  | 0.313625  | -2.650981 |
| H | 2.191687  | 1.398438  | -3.536956 |
| C | 4.201989  | 2.649277  | -1.371963 |
| H | 4.873573  | 1.773187  | -1.410715 |
| H | 4.695464  | 3.419519  | -0.763015 |
| H | 4.113973  | 3.041120  | -2.399090 |
| C | 2.738626  | 3.601638  | 1.425567  |
| H | 2.119556  | 4.513577  | 1.485948  |
| H | 3.773308  | 3.921385  | 1.237599  |
| H | 2.710974  | 3.121541  | 2.418551  |
| C | -0.011256 | 2.292561  | 1.345322  |
| H | -0.956480 | 2.312033  | 0.775064  |
| H | 0.163921  | 3.262990  | 1.828864  |
| H | -0.105753 | 1.512407  | 2.119884  |

|                                              |                             |
|----------------------------------------------|-----------------------------|
| Zero-point correction=                       | 0.596846 (Hartree/Particle) |
| Thermal correction to Energy=                | 0.632595                    |
| Thermal correction to Enthalpy=              | 0.633539                    |
| Thermal correction to Gibbs Free Energy=     | 0.531765                    |
| Sum of electronic and zero-point Energies=   | -1652.862700                |
| Sum of electronic and thermal Energies=      | -1652.826951                |
| Sum of electronic and thermal Enthalpies=    | -1652.826007                |
| Sum of electronic and thermal Free Energies= | -1652.927781                |

**Table S27.** Cartesian coordinates and energy values of **2**

|   |           |           |           |
|---|-----------|-----------|-----------|
| P | -0.687750 | 0.373393  | -1.080796 |
| O | -0.328662 | -0.548316 | -2.283503 |
| N | 2.099456  | 1.338946  | -1.323319 |
| N | 1.013467  | 2.263929  | 0.292770  |
| C | 0.949858  | 1.268457  | -0.623974 |
| C | 0.313435  | -1.359060 | 1.159110  |
| C | 1.718542  | -1.397849 | 0.650381  |
| C | -0.759584 | -0.707977 | 0.505586  |
| C | 2.236459  | 2.925339  | 0.212582  |
| C | 2.606770  | 4.023163  | 1.135041  |
| H | 1.979673  | 4.920044  | 0.993886  |
| H | 3.650605  | 4.325006  | 0.970919  |
| H | 2.508250  | 3.715078  | 2.190121  |
| C | 0.071827  | -2.106068 | 2.319218  |

|   |           |           |           |
|---|-----------|-----------|-----------|
| H | 0.917161  | -2.602726 | 2.808240  |
| C | 2.921887  | 2.336065  | -0.808367 |
| C | 2.041309  | -2.304929 | -0.381830 |
| C | -3.279235 | -0.359287 | 0.322789  |
| C | 2.465640  | 0.205382  | 2.470561  |
| H | 1.512656  | 0.748071  | 2.382935  |
| H | 3.275680  | 0.936912  | 2.621805  |
| H | 2.390893  | -0.393486 | 3.395186  |
| C | -2.066601 | -0.898851 | 1.010223  |
| C | -3.975158 | 0.735503  | 0.864678  |
| C | -2.277947 | -1.664616 | 2.162887  |
| H | -3.302997 | -1.803453 | 2.522616  |
| C | -0.086882 | 2.622387  | 1.161572  |
| H | -1.029660 | 2.374687  | 0.645033  |
| H | -0.060439 | 3.701642  | 1.363857  |
| H | -0.050471 | 2.075152  | 2.118108  |
| C | 0.982034  | -3.134804 | -1.037877 |
| H | 0.339348  | -3.636710 | -0.295049 |
| H | 1.427445  | -3.902847 | -1.687772 |
| H | 0.332235  | -2.479992 | -1.648307 |
| C | 2.740012  | -0.666293 | 1.279863  |
| C | 2.449559  | 0.495272  | -2.458471 |
| H | 3.269368  | -0.183829 | -2.181055 |
| H | 2.764409  | 1.135447  | -3.296637 |
| H | 1.550995  | -0.083206 | -2.730619 |
| C | 3.372582  | -2.421928 | -0.785116 |
| H | 3.619755  | -3.134864 | -1.581163 |
| C | -4.923629 | -0.504083 | -1.438793 |
| H | -5.304460 | -1.007317 | -2.335373 |
| C | -3.770622 | -1.003209 | -0.830298 |
| C | -1.212528 | -2.254388 | 2.828690  |
| H | -1.383165 | -2.850070 | 3.729628  |
| C | -3.530107 | 1.389409  | 2.141138  |
| H | -3.876872 | 0.826452  | 3.025762  |
| H | -3.933957 | 2.410102  | 2.227655  |
| H | -2.433568 | 1.436201  | 2.224835  |
| C | -5.603750 | 0.607602  | -0.943254 |
| C | -5.117086 | 1.208387  | 0.216841  |
| H | -5.647124 | 2.071862  | 0.636711  |
| C | 4.054115  | -0.783194 | 0.816143  |
| H | 4.841405  | -0.190126 | 1.298634  |
| C | 4.391576  | -1.655148 | -0.217332 |
| C | 4.282849  | 2.577839  | -1.338429 |
| H | 4.901408  | 1.665953  | -1.273512 |
| H | 4.785981  | 3.369152  | -0.765520 |
| H | 4.266914  | 2.890378  | -2.395702 |
| C | -6.812496 | 1.146659  | -1.646681 |
| H | -6.527097 | 1.844271  | -2.453262 |
| H | -7.471849 | 1.698172  | -0.958653 |
| H | -7.401389 | 0.341617  | -2.113609 |
| C | -3.080506 | -2.199599 | -1.416352 |



|   |           |           |           |
|---|-----------|-----------|-----------|
| H | -2.176864 | -1.896937 | -1.977768 |
| H | -3.748203 | -2.734608 | -2.108396 |
| H | -2.751715 | -2.906452 | -0.636585 |
| C | 5.797349  | -1.751280 | -0.729430 |
| H | 6.082442  | -2.794833 | -0.937798 |
| H | 6.523156  | -1.335727 | -0.013530 |
| H | 5.917109  | -1.196917 | -1.678398 |

|                                              |                             |
|----------------------------------------------|-----------------------------|
| Zero-point correction=                       | 0.600687 (Hartree/Particle) |
| Thermal correction to Energy=                | 0.637565                    |
| Thermal correction to Enthalpy=              | 0.638509                    |
| Thermal correction to Gibbs Free Energy=     | 0.533572                    |
| Sum of electronic and zero-point Energies=   | -1728.068856                |
| Sum of electronic and thermal Energies=      | -1728.031977                |
| Sum of electronic and thermal Enthalpies=    | -1728.031033                |
| Sum of electronic and thermal Free Energies= | -1728.135971                |

**Table S28.** Cartesian coordinates and energy values of **3**

|   |           |           |           |
|---|-----------|-----------|-----------|
| P | 0.585697  | 0.562707  | -0.811370 |
| O | 1.403346  | 1.796384  | -0.496633 |
| O | 0.519059  | -0.133744 | -2.161745 |
| N | -2.229191 | 1.259266  | -1.331369 |
| N | -1.470359 | 2.080939  | 0.514447  |
| C | -1.165402 | 1.257540  | -0.508669 |
| C | -0.231305 | -1.473219 | 1.092019  |
| C | -2.754246 | 2.586515  | 0.355516  |
| C | -3.235274 | 2.059459  | -0.808524 |
| C | -1.639880 | -1.489465 | 0.589772  |
| C | 0.808854  | -0.698833 | 0.531383  |
| C | 2.132840  | -0.900976 | 0.982163  |
| C | -2.677601 | -0.901014 | 1.333428  |
| C | 0.050974  | -2.355025 | 2.142270  |
| H | -0.768695 | -2.947706 | 2.562219  |
| C | 3.338784  | -0.313047 | 0.321667  |
| C | -2.328092 | 0.572448  | -2.613999 |
| H | -2.569373 | 1.309490  | -3.394364 |
| H | -3.118661 | -0.191335 | -2.564957 |
| H | -1.350668 | 0.113716  | -2.825123 |
| C | -1.944951 | -2.230010 | -0.573418 |
| C | -0.544979 | 2.498405  | 1.557836  |
| H | -1.120177 | 2.799047  | 2.443718  |
| H | 0.080128  | 3.326259  | 1.194713  |
| H | 0.123460  | 1.668915  | 1.819921  |
| C | -3.378489 | 3.520943  | 1.321039  |
| H | -3.481796 | 3.074805  | 2.324658  |
| H | -4.384264 | 3.802352  | 0.980098  |
| H | -2.793567 | 4.449002  | 1.431184  |
| C | -2.417461 | -0.228798 | 2.649887  |
| H | -2.416167 | -0.963926 | 3.474006  |
| H | -3.202175 | 0.509125  | 2.884040  |

|   |           |           |           |
|---|-----------|-----------|-----------|
| H | -1.436426 | 0.266726  | 2.687346  |
| C | 3.855143  | -0.949777 | -0.819163 |
| C | 2.376646  | -1.791895 | 2.033295  |
| H | 3.411060  | -1.932410 | 2.363611  |
| C | 4.012491  | 0.785129  | 0.883252  |
| C | 1.343237  | -2.503076 | 2.628323  |
| H | 1.548491  | -3.195965 | 3.448753  |
| C | -4.552048 | 2.197608  | -1.469901 |
| H | -4.460937 | 2.588290  | -2.496497 |
| H | -5.197197 | 2.885876  | -0.906931 |
| H | -5.069115 | 1.224317  | -1.530224 |
| C | -3.991006 | -0.975951 | 0.857935  |
| H | -4.790368 | -0.485893 | 1.428126  |
| C | -3.273683 | -2.310183 | -0.990734 |
| H | -3.507380 | -2.890868 | -1.892017 |
| C | -4.310462 | -1.674528 | -0.303856 |
| C | 5.044943  | -0.472747 | -1.376962 |
| H | 5.447966  | -0.973708 | -2.264937 |
| C | -0.873291 | -2.932690 | -1.348592 |
| H | -0.211714 | -2.198840 | -1.842876 |
| H | -1.308627 | -3.588457 | -2.117251 |
| H | -0.236971 | -3.547322 | -0.689874 |
| C | 5.196099  | 1.225926  | 0.297782  |
| H | 5.716392  | 2.085563  | 0.737162  |
| C | 3.429213  | 1.523449  | 2.047386  |
| H | 2.538116  | 2.071166  | 1.695113  |
| H | 4.142282  | 2.251349  | 2.462687  |
| H | 3.109529  | 0.851253  | 2.860460  |
| C | 5.729959  | 0.611525  | -0.836571 |
| C | 3.146580  | -2.106678 | -1.460125 |
| H | 2.826283  | -2.860420 | -0.721053 |
| H | 3.793658  | -2.604164 | -2.198073 |
| H | 2.239084  | -1.753204 | -1.982009 |
| C | -5.721564 | -1.770701 | -0.802512 |
| H | -6.402918 | -1.121870 | -0.230827 |
| H | -6.105142 | -2.802268 | -0.727052 |
| H | -5.794543 | -1.487970 | -1.867039 |
| C | 6.990913  | 1.127334  | -1.461558 |
| H | 7.737149  | 1.404071  | -0.699291 |
| H | 6.796430  | 2.032966  | -2.061938 |
| H | 7.447359  | 0.382879  | -2.131671 |

|                                              |                             |
|----------------------------------------------|-----------------------------|
| Zero-point correction=                       | 0.607703 (Hartree/Particle) |
| Thermal correction to Energy=                | 0.644586                    |
| Thermal correction to Enthalpy=              | 0.645530                    |
| Thermal correction to Gibbs Free Energy=     | 0.542318                    |
| Sum of electronic and zero-point Energies=   | -1803.304026                |
| Sum of electronic and thermal Energies=      | -1803.267144                |
| Sum of electronic and thermal Enthalpies=    | -1803.266200                |
| Sum of electronic and thermal Free Energies= | -1803.369411                |

**Table S29.** Cartesian coordinates and energy values of [4]

|   |           |           |           |
|---|-----------|-----------|-----------|
| C | 2.514421  | 2.597305  | -0.578966 |
| N | 1.219316  | 2.153657  | -0.325209 |
| C | 0.959128  | 1.017976  | -1.029850 |
| N | 2.080834  | 0.772660  | -1.753436 |
| C | 3.056793  | 1.719852  | -1.469993 |
| C | 2.244730  | -0.345185 | -2.666768 |
| C | 0.234236  | 2.788711  | 0.520945  |
| P | -0.747675 | 0.226303  | -1.128047 |
| O | -0.594053 | -0.943731 | -2.169877 |
| C | 4.423261  | 1.620418  | -2.031176 |
| C | 3.103670  | 3.782833  | 0.085095  |
| C | -0.772595 | -0.355780 | 0.640070  |
| C | 0.350937  | -0.652039 | 1.528277  |
| C | 0.141772  | -0.589764 | 2.913534  |
| C | -1.108178 | -0.373886 | 3.483695  |
| C | -2.226830 | -0.248899 | 2.626574  |
| C | -2.071263 | -0.241350 | 1.249943  |
| C | 1.689055  | -1.069563 | 1.063739  |
| C | 1.849715  | -2.213010 | 0.227509  |
| C | 3.119500  | -2.604540 | -0.184007 |
| C | 4.279477  | -1.892623 | 0.159214  |
| C | 4.120404  | -0.787486 | 0.991759  |
| C | 2.869893  | -0.375887 | 1.463100  |
| C | -3.317435 | -0.151726 | 0.431959  |
| C | -3.766852 | -1.257700 | -0.324467 |
| C | -4.980408 | -1.173799 | -1.007430 |
| C | -5.768363 | -0.021838 | -0.990083 |
| C | -5.307327 | 1.065452  | -0.252777 |
| C | -4.103414 | 1.019963  | 0.455341  |
| C | -2.960170 | -2.514775 | -0.423727 |
| C | -7.052018 | 0.040592  | -1.763533 |
| C | -3.655458 | 2.244003  | 1.200811  |
| C | 0.671294  | -3.034922 | -0.186633 |
| C | 5.618718  | -2.311147 | -0.366933 |
| C | 2.831622  | 0.818102  | 2.372133  |
| H | 0.993311  | -0.804247 | 3.572239  |
| H | -1.234725 | -0.392817 | 4.570493  |
| H | -3.239740 | -0.197709 | 3.045316  |
| H | -5.322842 | -2.047110 | -1.578093 |
| H | -5.899825 | 1.989722  | -0.232412 |
| H | -3.772694 | 2.146384  | 2.293112  |
| H | -4.229469 | 3.129270  | 0.879956  |
| H | -2.585539 | 2.439409  | 1.024649  |
| H | -2.138626 | -2.368149 | -1.150379 |
| H | -3.586183 | -3.358276 | -0.757930 |
| H | -2.493359 | -2.774432 | 0.540375  |
| H | -7.647899 | 0.926738  | -1.491338 |
| H | -7.676999 | -0.852254 | -1.588233 |
| H | -6.870738 | 0.088784  | -2.852497 |

|   |           |           |           |
|---|-----------|-----------|-----------|
| H | 3.212410  | -3.509754 | -0.800525 |
| H | 5.008636  | -0.210807 | 1.288070  |
| H | 0.101195  | -2.510304 | -0.979322 |
| H | -0.021084 | -3.188025 | 0.659202  |
| H | 0.995356  | -4.018679 | -0.565022 |
| H | 5.857132  | -3.360240 | -0.110539 |
| H | 6.428445  | -1.679654 | 0.035580  |
| H | 5.669359  | -2.247021 | -1.471630 |
| H | 1.961241  | 1.462859  | 2.163550  |
| H | 3.754455  | 1.415904  | 2.267959  |
| H | 2.745245  | 0.545849  | 3.440164  |
| H | 1.242728  | -0.799151 | -2.795848 |
| H | 2.935752  | -1.089149 | -2.238019 |
| H | 2.640589  | 0.023753  | -3.627444 |
| H | 4.898130  | 0.670468  | -1.724509 |
| H | 5.054138  | 2.445822  | -1.670041 |
| H | 4.428400  | 1.651077  | -3.134254 |
| H | 2.564655  | 4.715521  | -0.158009 |
| H | 4.148692  | 3.913855  | -0.231750 |
| H | 3.100768  | 3.676609  | 1.184550  |
| H | -0.654733 | 3.050870  | -0.080425 |
| H | 0.663570  | 3.696629  | 0.966061  |
| H | -0.093132 | 2.093634  | 1.313036  |

|                                              |                             |
|----------------------------------------------|-----------------------------|
| Zero-point correction=                       | 0.594787 (Hartree/Particle) |
| Thermal correction to Energy=                | 0.632035                    |
| Thermal correction to Enthalpy=              | 0.632979                    |
| Thermal correction to Gibbs Free Energy=     | 0.527011                    |
| Sum of electronic and zero-point Energies=   | -1728.062451                |
| Sum of electronic and thermal Energies=      | -1728.025203                |
| Sum of electronic and thermal Enthalpies=    | -1728.024259                |
| Sum of electronic and thermal Free Energies= | -1728.130227                |

**Table S30.** Cartesian coordinates and energy values of [5]

|   |           |          |           |
|---|-----------|----------|-----------|
| C | -4.394664 | 1.393680 | 1.886850  |
| C | -4.188603 | 1.893353 | 0.603686  |
| C | -2.958486 | 2.428458 | 0.207704  |
| C | -1.896902 | 2.440986 | 1.126280  |
| C | -2.082659 | 1.941482 | 2.431132  |
| C | -3.332890 | 1.436528 | 2.789480  |
| C | -0.572372 | 3.041643 | 0.778683  |
| C | 0.467068  | 2.347518 | 0.118332  |
| C | 1.716038  | 2.991703 | 0.017060  |
| C | 1.908666  | 4.295229 | 0.491526  |
| C | 0.860295  | 4.990499 | 1.082081  |
| C | -0.366981 | 4.352713 | 1.230900  |
| P | 0.394032  | 0.727797 | -0.947352 |
| O | -0.439823 | 1.244909 | -2.196054 |
| C | 2.910782  | 2.310276 | -0.572299 |

|   |           |           |           |
|---|-----------|-----------|-----------|
| C | 3.720942  | 1.505781  | 0.250793  |
| C | 4.910481  | 0.993965  | -0.277067 |
| C | 5.299610  | 1.231539  | -1.594101 |
| C | 4.457290  | 1.999463  | -2.403060 |
| C | 3.270493  | 2.544070  | -1.912750 |
| C | 3.262795  | 1.118341  | 1.620069  |
| C | 2.329378  | 3.283539  | -2.817079 |
| C | 6.583541  | 0.672146  | -2.134733 |
| C | -2.771279 | 2.958900  | -1.178847 |
| C | -0.939000 | 1.855618  | 3.397027  |
| C | -5.711098 | 0.804014  | 2.299840  |
| P | -0.717650 | -0.568154 | 0.693199  |
| C | -0.478283 | -2.152592 | -0.299036 |
| C | -1.584559 | -2.604214 | -1.065844 |
| C | -1.529158 | -3.806760 | -1.773774 |
| C | -0.394902 | -4.615359 | -1.729051 |
| C | 0.690078  | -4.192242 | -0.968861 |
| C | 0.673713  | -2.982714 | -0.260053 |
| C | -2.892374 | -1.872884 | -1.131692 |
| C | -3.850689 | -2.062307 | -0.115867 |
| C | -5.124472 | -1.509865 | -0.257457 |
| C | -5.476662 | -0.753492 | -1.374282 |
| C | -4.518976 | -0.576349 | -2.369667 |
| C | -3.236632 | -1.128482 | -2.279431 |
| C | 1.932708  | -2.708796 | 0.508552  |
| C | 3.097727  | -2.319001 | -0.178310 |
| C | 4.315031  | -2.275674 | 0.510272  |
| C | 4.412252  | -2.591915 | 1.861933  |
| C | 3.245031  | -2.969108 | 2.528137  |
| C | 2.013666  | -3.033047 | 1.877157  |
| C | -3.509601 | -2.821925 | 1.127738  |
| C | -2.256698 | -0.900612 | -3.386673 |
| C | -6.833829 | -0.124230 | -1.487776 |
| C | 3.050157  | -1.887237 | -1.612564 |
| C | 0.778585  | -3.381197 | 2.645680  |
| C | 5.721765  | -2.482747 | 2.586751  |
| O | 0.474114  | -0.487917 | 1.744136  |
| H | -2.409162 | -4.113989 | -2.353790 |
| H | 1.595198  | -4.811258 | -0.912257 |
| H | -0.362546 | -5.567665 | -2.269060 |
| H | 2.899649  | 4.755075  | 0.387660  |
| H | -1.197974 | 4.865257  | 1.732646  |
| H | 1.001584  | 6.015754  | 1.442083  |
| H | -5.865838 | -1.675369 | 0.535643  |
| H | -4.774119 | 0.011285  | -3.261663 |
| H | 5.217184  | -1.975668 | -0.039035 |
| H | 3.291650  | -3.218242 | 3.597033  |
| H | 5.538486  | 0.362902  | 0.365467  |
| H | 4.722466  | 2.162399  | -3.456618 |
| H | -5.008875 | 1.862590  | -0.124841 |
| H | -3.470530 | 1.032794  | 3.801639  |

|   |           |           |           |
|---|-----------|-----------|-----------|
| H | 1.020651  | -3.804950 | 3.634879  |
| H | 0.211920  | -2.438414 | 2.769139  |
| H | 0.134809  | -4.091599 | 2.099319  |
| H | 6.575497  | -2.693288 | 1.919682  |
| H | 5.878988  | -1.465837 | 2.993462  |
| H | 5.777056  | -3.180473 | 3.440160  |
| H | 4.060821  | -1.662420 | -1.993636 |
| H | 2.579459  | -2.639242 | -2.267285 |
| H | 2.439342  | -0.964988 | -1.695375 |
| H | -3.024756 | -3.787915 | 0.905732  |
| H | -2.779715 | -2.232491 | 1.717290  |
| H | -4.404438 | -3.005186 | 1.745888  |
| H | -1.721980 | -1.824192 | -3.660938 |
| H | -2.766761 | -0.510637 | -4.283746 |
| H | -1.492083 | -0.154706 | -3.067060 |
| H | -7.586898 | -0.668997 | -0.892949 |
| H | -6.828734 | 0.919723  | -1.119185 |
| H | -7.183842 | -0.089962 | -2.533716 |
| H | 4.046344  | 0.560195  | 2.159816  |
| H | 2.967244  | 1.994972  | 2.223377  |
| H | 2.353749  | 0.470192  | 1.561470  |
| H | 6.928006  | -0.190899 | -1.540266 |
| H | 6.468574  | 0.334036  | -3.179276 |
| H | 7.402069  | 1.417198  | -2.129137 |
| H | 1.356687  | 2.752737  | -2.864060 |
| H | 2.113466  | 4.300210  | -2.445182 |
| H | 2.739877  | 3.366992  | -3.837066 |
| H | -0.235778 | 1.071826  | 3.039644  |
| H | -0.374511 | 2.800070  | 3.469957  |
| H | -1.294935 | 1.579945  | 4.403902  |
| H | -2.425584 | 4.008795  | -1.160409 |
| H | -1.986713 | 2.371767  | -1.708358 |
| H | -3.714100 | 2.913472  | -1.750054 |
| H | -5.618411 | -0.280950 | 2.490296  |
| H | -6.090531 | 1.261017  | 3.231945  |
| H | -6.479945 | 0.935387  | 1.520135  |

|                                              |                             |
|----------------------------------------------|-----------------------------|
| Zero-point correction=                       | 0.830646 (Hartree/Particle) |
| Thermal correction to Energy=                | 0.882311                    |
| Thermal correction to Enthalpy=              | 0.883255                    |
| Thermal correction to Gibbs Free Energy=     | 0.749010                    |
| Sum of electronic and zero-point Energies=   | -2690.142752                |
| Sum of electronic and thermal Energies=      | -2690.091088                |
| Sum of electronic and thermal Enthalpies=    | -2690.090143                |
| Sum of electronic and thermal Free Energies= | -2690.224388                |

**Table S31.** Cartesian coordinates and energy values of [7]

|   |           |          |           |
|---|-----------|----------|-----------|
| P | -0.558615 | 0.119008 | -0.958027 |
| N | 1.919962  | 1.581558 | -1.207353 |
| N | 0.648819  | 2.288344 | 0.400450  |

|   |           |           |           |
|---|-----------|-----------|-----------|
| C | -0.702158 | -0.968002 | 0.511359  |
| C | 0.403393  | -1.616045 | 1.099691  |
| C | 0.162417  | -2.433937 | 2.206820  |
| H | 1.010142  | -2.945741 | 2.672857  |
| C | -1.127549 | -2.621424 | 2.696061  |
| H | -1.290682 | -3.274588 | 3.556839  |
| C | -2.210573 | -1.998769 | 2.084978  |
| H | -3.227310 | -2.162848 | 2.453257  |
| C | -2.016156 | -1.164398 | 0.981859  |
| C | -3.169178 | -0.513724 | 0.301040  |
| C | -3.617382 | -1.019063 | -0.942613 |
| C | -4.666829 | -0.367418 | -1.587599 |
| H | -5.019277 | -0.760151 | -2.547847 |
| C | -5.293678 | 0.754508  | -1.041932 |
| C | -4.867789 | 1.201031  | 0.209345  |
| H | -5.373658 | 2.055982  | 0.671996  |
| C | -3.832127 | 0.574973  | 0.904208  |
| C | -3.501832 | 1.044956  | 2.292695  |
| H | -4.157981 | 0.556358  | 3.034070  |
| H | -3.665976 | 2.129286  | 2.398543  |
| H | -2.470878 | 0.810107  | 2.597131  |
| C | -3.017140 | -2.246179 | -1.566502 |
| H | -2.137043 | -2.002115 | -2.187124 |
| H | -3.748401 | -2.737499 | -2.224490 |
| H | -2.692109 | -2.979610 | -0.811777 |
| 6 | -6.400564 | 1.440176  | -1.779560 |
| H | -6.921912 | 2.173399  | -1.147857 |
| H | -7.143039 | 0.714999  | -2.147796 |
| H | -6.014253 | 1.974206  | -2.663752 |
| C | 1.793387  | -1.507817 | 0.571919  |
| C | 2.184809  | -2.329145 | -0.506970 |
| C | 3.507692  | -2.269620 | -0.946942 |
| H | 3.815699  | -2.914954 | -1.777513 |
| C | 4.449472  | -1.422082 | -0.358247 |
| C | 4.038752  | -0.627077 | 0.712508  |
| H | 4.767579  | 0.028340  | 1.204502  |
| C | 2.731190  | -0.672715 | 1.204273  |
| C | 1.216211  | -3.266668 | -1.162875 |
| H | 0.464763  | -2.712810 | -1.751240 |
| H | 0.667183  | -3.870015 | -0.421461 |
| H | 1.734824  | -3.955403 | -1.844470 |
| C | 5.861654  | -1.388693 | -0.857716 |
| H | 6.403292  | -2.305704 | -0.571681 |
| H | 6.423068  | -0.536093 | -0.447093 |
| H | 5.901343  | -1.332593 | -1.957684 |
| C | 2.372874  | 0.130605  | 2.420784  |
| H | 1.377567  | 0.597302  | 2.342524  |
| H | 3.116979  | 0.919368  | 2.611424  |
| H | 2.338436  | -0.505506 | 3.321988  |
| C | 0.758515  | 1.354176  | -0.567413 |
| C | 2.587012  | 2.630915  | -0.598420 |

|   |           |           |           |
|---|-----------|-----------|-----------|
| C | 1.784329  | 3.079912  | 0.419232  |
| C | 2.459656  | 0.845979  | -2.348671 |
| H | 1.693866  | 0.157418  | -2.722409 |
| H | 3.350358  | 0.286262  | -2.027896 |
| H | 2.728686  | 1.564569  | -3.135157 |
| C | 3.922854  | 3.079327  | -1.049897 |
| H | 4.650720  | 2.251440  | -1.026361 |
| H | 4.299654  | 3.879856  | -0.400058 |
| H | 3.896621  | 3.470398  | -2.079858 |
| C | 1.977715  | 4.164001  | 1.408147  |
| H | 1.249703  | 4.981018  | 1.274094  |
| H | 2.980693  | 4.598864  | 1.307664  |
| H | 1.875067  | 3.790044  | 2.440165  |
| C | -0.500014 | 2.464714  | 1.273176  |
| H | -1.388704 | 2.016932  | 0.803635  |
| H | -0.684980 | 3.537597  | 1.414850  |
| H | -0.325780 | 1.993273  | 2.253248  |
| O | -0.227536 | -0.545098 | -2.292872 |

|                                              |                             |
|----------------------------------------------|-----------------------------|
| Zero-point correction=                       | 0.601799 (Hartree/Particle) |
| Thermal correction to Energy=                | 0.637253                    |
| Thermal correction to Enthalpy=              | 0.638198                    |
| Thermal correction to Gibbs Free Energy=     | 0.536120                    |
| Sum of electronic and zero-point Energies=   | -1727.859234                |
| Sum of electronic and thermal Energies=      | -1727.823780                |
| Sum of electronic and thermal Enthalpies=    | -1727.822836                |
| Sum of electronic and thermal Free Energies= | -1727.924913                |

**Table S32.** Cartesian coordinates and energy values of [8]

|   |           |           |           |
|---|-----------|-----------|-----------|
| N | 1.874038  | 1.626101  | -1.122748 |
| N | 1.426150  | 1.844524  | 0.982609  |
| C | -0.836113 | -0.865212 | 0.372974  |
| C | 0.253891  | -1.730330 | 0.621182  |
| C | -0.006525 | -2.970189 | 1.218298  |
| H | 0.836509  | -3.642646 | 1.405479  |
| C | -1.297605 | -3.368603 | 1.544064  |
| H | -1.467232 | -4.343288 | 2.007870  |
| C | -2.371419 | -2.537137 | 1.249575  |
| H | -3.398233 | -2.850712 | 1.461159  |
| C | -2.155618 | -1.289233 | 0.665143  |
| C | -3.329602 | -0.454516 | 0.269738  |
| C | -3.891886 | -0.642776 | -1.010743 |
| C | -4.972027 | 0.154620  | -1.394008 |
| H | -5.408588 | 0.010822  | -2.388952 |
| C | -5.528962 | 1.107184  | -0.537831 |
| C | -4.973988 | 1.250996  | 0.734347  |
| H | -5.402917 | 1.986439  | 1.424053  |
| C | -3.887678 | 0.485273  | 1.156352  |
| C | -3.301546 | 0.705411  | 2.517066  |
| H | -3.046583 | -0.239854 | 3.021369  |



|   |           |           |           |
|---|-----------|-----------|-----------|
| H | -3.992629 | 1.264153  | 3.164181  |
| H | -2.370445 | 1.298495  | 2.449053  |
| C | -3.367273 | -1.695948 | -1.942874 |
| H | -2.288365 | -1.578598 | -2.138571 |
| H | -3.894655 | -1.669058 | -2.907306 |
| H | -3.500303 | -2.705910 | -1.520408 |
| C | -6.713852 | 1.920172  | -0.957505 |
| H | -6.723321 | 2.906738  | -0.470585 |
| H | -7.653767 | 1.413864  | -0.679323 |
| H | -6.739319 | 2.070323  | -2.047098 |
| H | 1.670686  | -1.481992 | 0.219215  |
| H | 2.046119  | -1.715804 | -1.119112 |
| H | 3.391751  | -1.599535 | -1.474696 |
| H | 3.682854  | -1.806120 | -2.512152 |
| C | 4.378353  | -1.257542 | -0.546895 |
| C | 3.984137  | -1.044682 | 0.773550  |
| H | 4.744330  | -0.796603 | 1.524616  |
| C | 2.653751  | -1.180135 | 1.179582  |
| C | 1.031968  | -2.117409 | -2.149878 |
| H | 0.279796  | -1.329242 | -2.325714 |
| H | 0.470168  | -3.012450 | -1.833067 |
| H | 1.514592  | -2.346200 | -3.111467 |
| C | 5.821171  | -1.174986 | -0.942866 |
| H | 6.336916  | -2.130942 | -0.750317 |
| H | 6.358530  | -0.403676 | -0.368908 |
| H | 5.941489  | -0.957950 | -2.015407 |
| C | 2.325223  | -1.062257 | 2.639934  |
| H | 1.286390  | -0.752866 | 2.826672  |
| H | 3.004375  | -0.361762 | 3.152723  |
| H | 2.447504  | -2.035718 | 3.146257  |
| C | 0.934379  | 1.386159  | -0.189720 |
| C | 2.992758  | 2.196731  | -0.526781 |
| C | 2.710077  | 2.338138  | 0.801866  |
| C | 1.830087  | 1.316092  | -2.547004 |
| H | 0.815129  | 1.020639  | -2.823599 |
| H | 2.532021  | 0.495327  | -2.759071 |
| H | 2.122738  | 2.209858  | -3.114991 |
| C | 4.219630  | 2.502693  | -1.295024 |
| H | 4.606014  | 1.601626  | -1.800012 |
| H | 5.006893  | 2.874943  | -0.626174 |
| H | 4.047672  | 3.271128  | -2.066102 |
| C | 3.532998  | 2.870075  | 1.911588  |
| H | 3.045951  | 3.716807  | 2.421213  |
| H | 4.497231  | 3.228936  | 1.528222  |
| H | 3.746581  | 2.097087  | 2.669236  |
| C | 0.681777  | 1.908164  | 2.231147  |
| H | 0.055969  | 2.813934  | 2.261966  |
| H | 1.386047  | 1.920525  | 3.071769  |
| H | 0.043126  | 1.020814  | 2.339178  |
| O | -1.017973 | 0.692090  | -1.925767 |
| H | -1.893583 | 1.026723  | -2.177772 |

|                                              |                             |
|----------------------------------------------|-----------------------------|
| Zero-point correction=                       | 0.613832 (Hartree/Particle) |
| Thermal correction to Energy=                | 0.651146                    |
| Thermal correction to Enthalpy=              | 0.652090                    |
| Thermal correction to Gibbs Free Energy=     | 0.546168                    |
| Sum of electronic and zero-point Energies=   | -1728.487277                |
| Sum of electronic and thermal Energies=      | -1728.449962                |
| Sum of electronic and thermal Enthalpies=    | -1728.449018                |
| Sum of electronic and thermal Free Energies= | -1728.554941                |

**Table S33.** Cartesian coordinates and energy values of [9]

|   |           |           |           |
|---|-----------|-----------|-----------|
| P | 0.543265  | 0.219535  | -0.900486 |
| O | 0.397077  | -0.394471 | -2.272072 |
| N | -2.034744 | 1.448010  | -1.262288 |
| C | -0.925782 | 1.298706  | -0.520752 |
| C | 1.263733  | -2.530407 | 2.717243  |
| H | 1.447736  | -3.179498 | 3.576860  |
| C | 3.725453  | -0.930032 | -0.895546 |
| C | -1.679849 | -1.519613 | 0.579188  |
| C | -2.212897 | 2.855242  | 0.438729  |
| C | -2.666581 | -0.769830 | 1.243749  |
| N | -1.014640 | 2.162356  | 0.510216  |
| C | 0.787365  | -0.870547 | 0.534580  |
| C | 3.898032  | 0.734135  | 0.887819  |
| C | -3.964824 | -0.745002 | 0.725235  |
| H | -4.728706 | -0.147373 | 1.237587  |
| C | 4.931229  | 1.350820  | 0.178970  |
| H | 5.409208  | 2.239168  | 0.607778  |
| C | 3.268566  | -0.392368 | 0.327737  |
| C | -3.337775 | -2.278307 | -1.002855 |
| H | -3.607993 | -2.900316 | -1.864152 |
| C | 3.129424  | -2.173686 | -1.491852 |
| H | 2.232096  | -1.944364 | -2.092319 |
| H | 2.833685  | -2.903204 | -0.721136 |
| H | 3.851985  | -2.663260 | -2.160642 |
| C | -0.289012 | -1.578523 | 1.113911  |
| C | -4.321731 | -1.492612 | -0.396154 |
| C | 4.769940  | -0.286364 | -1.557515 |
| H | 5.127155  | -0.702236 | -2.506250 |
| C | 5.378716  | 0.862000  | -1.047628 |
| C | 2.109765  | -1.035092 | 1.008491  |
| C | 2.322615  | -1.861949 | 2.113873  |
| H | 3.344398  | -1.988650 | 2.483318  |
| C | -2.021454 | -2.307566 | -0.543102 |
| C | -2.380652 | -0.039857 | 2.524151  |
| H | -2.558440 | -0.695269 | 3.394794  |
| H | -3.047123 | 0.829273  | 2.646581  |
| H | -1.334873 | 0.293128  | 2.607376  |
| C | -1.012642 | -3.186096 | -1.220007 |
| H | -0.308597 | -2.589038 | -1.823703 |

|   |           |           |           |
|---|-----------|-----------|-----------|
| H | -1.506072 | -3.902828 | -1.891509 |
| H | -0.415179 | -3.757855 | -0.491482 |
| C | -2.860263 | 2.393491  | -0.677392 |
| C | 3.521037  | 1.285033  | 2.234099  |
| H | 4.245251  | 0.963155  | 3.002582  |
| H | 2.534243  | 0.946019  | 2.584073  |
| H | 3.537653  | 2.386977  | 2.235968  |
| C | -0.027046 | -2.397521 | 2.213747  |
| H | -0.856598 | -2.949671 | 2.665447  |
| C | -4.180562 | 2.743092  | -1.246818 |
| H | -4.092406 | 3.153097  | -2.265567 |
| H | -4.679561 | 3.498188  | -0.625747 |
| H | -4.838815 | 1.860072  | -1.298491 |
| C | 0.022417  | 2.405396  | 1.501518  |
| H | 0.606105  | 1.488618  | 1.660606  |
| H | -0.444910 | 2.687188  | 2.453716  |
| H | 0.690865  | 3.216221  | 1.171667  |
| C | -2.373167 | 0.755427  | -2.506598 |
| H | -2.587127 | 1.507410  | -3.278754 |
| H | -3.259125 | 0.127641  | -2.336645 |
| H | -1.520787 | 0.137358  | -2.811553 |
| C | 6.505258  | 1.518274  | -1.783396 |
| H | 6.695735  | 2.536975  | -1.415756 |
| H | 6.302805  | 1.572786  | -2.864154 |
| H | 7.439328  | 0.944293  | -1.662789 |
| C | -5.718332 | -1.476112 | -0.938519 |
| H | -6.161862 | -2.484818 | -0.923033 |
| H | -5.738886 | -1.145388 | -1.991355 |
| H | -6.377343 | -0.812654 | -0.359375 |
| C | -2.601537 | 3.882859  | 1.431447  |
| H | -2.707584 | 3.459023  | 2.443903  |
| H | -3.566368 | 4.329433  | 1.158090  |
| H | -1.862555 | 4.698415  | 1.485226  |
| H | 1.566108  | 1.204206  | -0.760924 |

|                                              |                             |
|----------------------------------------------|-----------------------------|
| Zero-point correction=                       | 0.612923 (Hartree/Particle) |
| Thermal correction to Energy=                | 0.649846                    |
| Thermal correction to Enthalpy=              | 0.650790                    |
| Thermal correction to Gibbs Free Energy=     | 0.545986                    |
| Sum of electronic and zero-point Energies=   | -1728.478835                |
| Sum of electronic and thermal Energies=      | -1728.441912                |
| Sum of electronic and thermal Enthalpies=    | -1728.440968                |
| Sum of electronic and thermal Free Energies= | -1728.545772                |

**Table S34.** Cartesian coordinates and energy values of [10]

|   |           |           |           |
|---|-----------|-----------|-----------|
| P | -0.613123 | 0.168417  | -1.077276 |
| N | 1.947765  | 1.411356  | -1.347345 |
| N | 0.876687  | 2.130900  | 0.389458  |
| C | -0.753690 | -0.827610 | 0.461582  |
| C | 0.341383  | -1.475784 | 1.083858  |

|   |           |           |           |
|---|-----------|-----------|-----------|
| C | 0.095141  | -2.271468 | 2.205168  |
| H | 0.937398  | -2.783768 | 2.680257  |
| C | -1.196907 | -2.454204 | 2.690356  |
| H | -1.366201 | -3.089095 | 3.563366  |
| C | -2.273474 | -1.852529 | 2.047042  |
| H | -3.294634 | -2.008123 | 2.407905  |
| C | -2.071772 | -1.042852 | 0.928399  |
| C | -3.240348 | -0.423052 | 0.238607  |
| C | -3.715208 | -0.985949 | -0.966695 |
| C | -4.799229 | -0.390308 | -1.606584 |
| H | -5.171806 | -0.832331 | -2.537562 |
| C | -5.433698 | 0.742480  | -1.091136 |
| C | -4.969618 | 1.259031  | 0.116914  |
| H | -5.472640 | 2.128691  | 0.554713  |
| C | -3.894600 | 0.688116  | 0.802216  |
| C | -3.516860 | 1.238976  | 2.147764  |
| H | -4.131851 | 0.782213  | 2.942942  |
| H | -3.693117 | 2.325001  | 2.199936  |
| H | -2.469844 | 1.035705  | 2.418136  |
| C | -3.084697 | -2.210095 | -1.563830 |
| H | -2.171052 | -1.964722 | -2.137442 |
| H | -3.773198 | -2.701438 | -2.266266 |
| H | -2.794055 | -2.946318 | -0.797548 |
| C | -6.582203 | 1.368502  | -1.819035 |
| H | -7.098560 | 2.117313  | -1.201521 |
| H | -7.320131 | 0.611272  | -2.127239 |
| H | -6.240990 | 1.872196  | -2.738892 |
| C | 1.728645  | -1.434376 | 0.537698  |
| C | 2.041607  | -2.201229 | -0.606852 |
| C | 3.352216  | -2.198609 | -1.083986 |
| H | 3.595886  | -2.810114 | -1.961130 |
| C | 4.364230  | -1.452456 | -0.474452 |
| C | 4.036993  | -0.721899 | 0.666827  |
| H | 4.820531  | -0.152030 | 1.180782  |
| C | 2.745026  | -0.723566 | 1.201502  |
| C | 1.010150  | -3.040173 | -1.305124 |
| H | 0.318082  | -3.523049 | -0.597286 |
| H | 1.488231  | -3.827219 | -1.905968 |
| H | 0.387706  | -2.441977 | -1.996520 |
| C | 5.755246  | -1.461214 | -1.031353 |
| H | 6.182126  | -2.477233 | -1.017979 |
| H | 6.431210  | -0.808616 | -0.459479 |
| H | 5.772043  | -1.131655 | -2.084571 |
| C | 2.490026  | 0.003625  | 2.489091  |
| H | 1.511972  | 0.509436  | 2.504791  |
| H | 3.277448  | 0.746935  | 2.687430  |
| H | 2.485562  | -0.691654 | 3.345994  |
| C | 0.813626  | 1.251763  | -0.635030 |
| C | 2.764298  | 2.350740  | -0.738350 |
| C | 2.084565  | 2.812771  | 0.356992  |
| C | 2.295168  | 0.711029  | -2.573405 |

|   |           |           |           |
|---|-----------|-----------|-----------|
| H | 1.524361  | -0.039195 | -2.792000 |
| H | 3.259034  | 0.197565  | -2.447367 |
| H | 2.353772  | 1.425633  | -3.407430 |
| C | 4.110599  | 2.677918  | -1.257987 |
| H | 4.767405  | 1.791119  | -1.240670 |
| H | 4.581601  | 3.456179  | -0.643375 |
| H | 4.073862  | 3.049204  | -2.294596 |
| C | 2.446980  | 3.835585  | 1.364349  |
| H | 1.814225  | 4.735191  | 1.283510  |
| H | 3.488473  | 4.155117  | 1.226808  |
| H | 2.346053  | 3.449046  | 2.391175  |
| C | -0.201115 | 2.405581  | 1.324872  |
| H | -0.230108 | 3.482747  | 1.534755  |
| H | -0.061265 | 1.855306  | 2.268578  |
| H | -1.156732 | 2.108151  | 0.871597  |

|                                              |                             |
|----------------------------------------------|-----------------------------|
| Zero-point correction=                       | 0.597653 (Hartree/Particle) |
| Thermal correction to Energy=                | 0.632885                    |
| Thermal correction to Enthalpy=              | 0.633829                    |
| Thermal correction to Gibbs Free Energy=     | 0.532445                    |
| Sum of electronic and zero-point Energies=   | -1652.667738                |
| Sum of electronic and thermal Energies=      | -1652.632507                |
| Sum of electronic and thermal Enthalpies=    | -1652.631563                |
| Sum of electronic and thermal Free Energies= | -1652.732947                |

**Table S35.** Cartesian coordinates and energy values of [11]

|   |           |           |           |
|---|-----------|-----------|-----------|
| P | -0.353594 | -0.078565 | -1.212648 |
| N | 1.955162  | 1.566021  | -1.280749 |
| N | 0.582204  | 2.278059  | 0.228450  |
| C | -0.666932 | -0.913205 | 0.419217  |
| C | 0.422842  | -1.528966 | 1.069348  |
| C | 0.195756  | -2.247327 | 2.246216  |
| H | 1.046982  | -2.720979 | 2.745135  |
| C | -1.088579 | -2.387483 | 2.759337  |
| H | -1.255321 | -2.964551 | 3.671895  |
| C | -2.162561 | -1.811425 | 2.093037  |
| H | -3.180175 | -1.937750 | 2.474637  |
| C | -1.979986 | -1.072379 | 0.918515  |
| C | -3.180837 | -0.513300 | 0.235956  |
| C | -3.620437 | -1.079451 | -0.981513 |
| C | -4.730342 | -0.533527 | -1.620993 |
| H | -5.072570 | -0.981125 | -2.561132 |
| C | -5.426939 | 0.558423  | -1.096126 |
| C | -4.996059 | 1.080250  | 0.120230  |
| H | -5.541873 | 1.920749  | 0.564206  |
| C | -3.899963 | 0.551711  | 0.810214  |
| C | -3.573517 | 1.123248  | 2.162070  |
| H | -4.256427 | 0.717486  | 2.928516  |
| H | -3.709361 | 2.217152  | 2.175527  |
| H | -2.554470 | 0.888453  | 2.500858  |

|   |           |           |           |
|---|-----------|-----------|-----------|
| C | -2.930181 | -2.264195 | -1.596129 |
| H | -2.062269 | -1.970091 | -2.217170 |
| H | -3.613629 | -2.808240 | -2.264191 |
| H | -2.558095 | -2.971657 | -0.838477 |
| C | -6.618466 | 1.115221  | -1.811231 |
| H | -6.962621 | 2.057525  | -1.361446 |
| H | -7.461679 | 0.405244  | -1.782851 |
| H | -6.397942 | 1.302249  | -2.874109 |
| C | 1.815035  | -1.479514 | 0.533707  |
| C | 2.197484  | -2.365341 | -0.494703 |
| C | 3.521875  | -2.352836 | -0.940058 |
| H | 3.818725  | -3.050520 | -1.731214 |
| C | 4.478639  | -1.495553 | -0.394739 |
| C | 4.078946  | -0.634818 | 0.630561  |
| H | 4.820610  | 0.030422  | 1.089780  |
| C | 2.770768  | -0.626175 | 1.118613  |
| C | 1.220428  | -3.334324 | -1.092209 |
| H | 0.651021  | -3.869553 | -0.315193 |
| H | 1.734767  | -4.081242 | -1.713218 |
| H | 0.478370  | -2.827634 | -1.734512 |
| C | 5.900604  | -1.519951 | -0.866320 |
| H | 6.515441  | -2.176140 | -0.227266 |
| H | 6.361257  | -0.519930 | -0.828073 |
| H | 5.984948  | -1.901967 | -1.894560 |
| C | 2.428214  | 0.248481  | 2.289745  |
| H | 1.428334  | 0.702544  | 2.200679  |
| H | 3.171695  | 1.050131  | 2.420903  |
| H | 2.412430  | -0.333636 | 3.227137  |
| C | 0.750589  | 1.335935  | -0.722551 |
| C | 2.572656  | 2.637540  | -0.659206 |
| C | 1.703481  | 3.089484  | 0.298162  |
| C | 2.562562  | 0.823823  | -2.376395 |
| H | 1.857483  | 0.065362  | -2.736125 |
| H | 3.475040  | 0.324490  | -2.018808 |
| H | 2.805091  | 1.515477  | -3.195234 |
| C | 3.922393  | 3.104632  | -1.048379 |
| H | 4.668111  | 2.297303  | -0.960014 |
| H | 4.244028  | 3.932053  | -0.402595 |
| H | 3.946350  | 3.467524  | -2.088789 |
| C | 1.824210  | 4.191278  | 1.279374  |
| H | 1.078732  | 4.984305  | 1.104992  |
| H | 2.817603  | 4.654205  | 1.214893  |
| H | 1.689629  | 3.827143  | 2.311378  |
| C | -0.592819 | 2.441473  | 1.066462  |
| H | -1.442186 | 1.914562  | 0.614360  |
| H | -0.836991 | 3.509194  | 1.145422  |
| H | -0.408989 | 2.034660  | 2.073601  |
| H | -1.542886 | 0.716309  | -1.264401 |

Zero-point correction= 0.606985 (Hartree/Particle)  
 Thermal correction to Energy= 0.643516

|                                              |              |
|----------------------------------------------|--------------|
| Thermal correction to Enthalpy=              | 0.644461     |
| Thermal correction to Gibbs Free Energy=     | 0.539464     |
| Sum of electronic and zero-point Energies=   | -1653.283152 |
| Sum of electronic and thermal Energies=      | -1653.246621 |
| Sum of electronic and thermal Enthalpies=    | -1653.245677 |
| Sum of electronic and thermal Free Energies= | -1653.350674 |

**Table S36.** Cartesian coordinates and energy values of [12]

|   |           |           |           |
|---|-----------|-----------|-----------|
| P | -0.522378 | 0.247019  | -0.907240 |
| N | 2.092171  | 1.423947  | -1.285583 |
| N | 1.055812  | 2.233133  | 0.432608  |
| C | -0.682547 | -0.864344 | 0.540825  |
| C | 0.347010  | -1.609183 | 1.137434  |
| C | 0.031674  | -2.433835 | 2.223968  |
| H | 0.833570  | -3.009881 | 2.695899  |
| C | -1.273315 | -2.538030 | 2.692216  |
| H | -1.500321 | -3.192689 | 3.536872  |
| C | -2.296825 | -1.821072 | 2.078049  |
| H | -3.330047 | -1.924603 | 2.424567  |
| C | -2.007322 | -0.979171 | 1.001603  |
| C | -3.136726 | -0.322628 | 0.287037  |
| C | -3.648470 | -0.962598 | -0.907213 |
| C | -4.802696 | -0.465781 | -1.478383 |
| H | -5.190518 | -0.935625 | -2.386955 |
| C | -5.510126 | 0.606899  | -0.912809 |
| C | -5.046624 | 1.169543  | 0.297170  |
| H | -5.620794 | 1.982744  | 0.752438  |
| C | -3.898722 | 0.731000  | 0.912040  |
| C | -3.418339 | 1.389262  | 2.160242  |
| H | -4.233176 | 1.928100  | 2.663104  |
| H | -2.643947 | 2.130326  | 1.901885  |
| H | -2.969737 | 0.682299  | 2.873224  |
| C | -2.959092 | -2.138493 | -1.509621 |
| H | -2.047491 | -1.815829 | -2.047056 |
| H | -3.615261 | -2.645350 | -2.229931 |
| H | -2.639072 | -2.865687 | -0.746028 |
| C | -6.730276 | 1.151275  | -1.562833 |
| H | -7.516201 | 1.368002  | -0.822518 |
| H | -7.131109 | 0.475966  | -2.330576 |
| H | -6.492518 | 2.112181  | -2.053679 |
| C | 1.751547  | -1.565627 | 0.636456  |
| C | 2.115737  | -2.373704 | -0.461411 |
| C | 3.439726  | -2.349286 | -0.898758 |
| H | 3.726740  | -2.985656 | -1.744012 |
| C | 4.408557  | -1.545495 | -0.292409 |
| C | 4.027072  | -0.771225 | 0.802828  |
| H | 4.777770  | -0.155565 | 1.313054  |
| C | 2.718999  | -0.788880 | 1.296646  |
| C | 1.113921  | -3.253113 | -1.145508 |
| H | 0.528948  | -3.845794 | -0.422912 |

|   |           |           |           |
|---|-----------|-----------|-----------|
| H | 1.608401  | -3.951660 | -1.835327 |
| H | 0.403170  | -2.642506 | -1.728064 |
| C | 5.815391  | -1.536302 | -0.808528 |
| H | 6.261601  | -2.543009 | -0.764202 |
| H | 6.461440  | -0.859090 | -0.230538 |
| H | 5.854757  | -1.225834 | -1.866945 |
| C | 2.393494  | -0.021979 | 2.545222  |
| H | 1.415379  | 0.482208  | 2.496040  |
| H | 3.167600  | 0.730096  | 2.762799  |
| H | 2.344311  | -0.692632 | 3.420699  |
| C | 0.954803  | 1.340104  | -0.572319 |
| C | 2.936479  | 2.357860  | -0.711998 |
| C | 2.279948  | 2.878645  | 0.371849  |
| C | 2.447419  | 0.678774  | -2.492599 |
| H | 1.597786  | 0.046658  | -2.776136 |
| H | 3.333292  | 0.062703  | -2.281436 |
| H | 2.672402  | 1.395680  | -3.294838 |
| C | 4.282598  | 2.640398  | -1.258147 |
| H | 4.913747  | 1.736177  | -1.249013 |
| H | 4.788514  | 3.409245  | -0.659840 |
| H | 4.235664  | 3.002458  | -2.297620 |
| C | 2.692029  | 3.924382  | 1.336737  |
| H | 2.001663  | 4.783196  | 1.330651  |
| H | 3.689932  | 4.303205  | 1.079735  |
| H | 2.741221  | 3.540230  | 2.369008  |
| C | 0.009291  | 2.533388  | 1.396771  |
| H | -0.743049 | 3.194845  | 0.943581  |
| H | 0.459512  | 3.015282  | 2.273065  |
| H | -0.480550 | 1.603328  | 1.713839  |
| O | -0.250754 | -0.482886 | -2.201975 |
| O | -1.748187 | 1.187503  | -0.726871 |

|                                              |                             |
|----------------------------------------------|-----------------------------|
| Zero-point correction=                       | 0.606519 (Hartree/Particle) |
| Thermal correction to Energy=                | 0.644034                    |
| Thermal correction to Enthalpy=              | 0.644978                    |
| Thermal correction to Gibbs Free Energy=     | 0.538685                    |
| Sum of electronic and zero-point Energies=   | -1803.064308                |
| Sum of electronic and thermal Energies=      | -1803.026792                |
| Sum of electronic and thermal Enthalpies=    | -1803.025848                |
| Sum of electronic and thermal Free Energies= | -1803.132141                |

**Table S37.** Cartesian coordinates and energy values of [13]

|     |           |           |           |
|-----|-----------|-----------|-----------|
| . P | -0.483643 | 0.360542  | -0.811620 |
| N   | 2.158864  | 1.351156  | -1.284856 |
| N   | 1.320951  | 2.095625  | 0.571632  |
| C   | -0.782528 | -0.788626 | 0.572638  |
| C   | 0.279429  | -1.541376 | 1.122550  |
| C   | 0.005232  | -2.405301 | 2.186196  |
| H   | 0.828032  | -2.987954 | 2.611244  |



|   |           |           |           |
|---|-----------|-----------|-----------|
| C | -1.286573 | -2.552314 | 2.677298  |
| H | -1.482170 | -3.238474 | 3.504753  |
| C | -2.335391 | -1.858144 | 2.086078  |
| H | -3.363971 | -2.012253 | 2.425635  |
| C | -2.109622 | -0.981277 | 1.022501  |
| C | -3.294544 | -0.377138 | 0.343777  |
| C | -3.757043 | -0.946788 | -0.860430 |
| C | -4.866962 | -0.372808 | -1.487424 |
| H | -5.224491 | -0.812369 | -2.424791 |
| C | -5.534776 | 0.728761  | -0.956692 |
| C | -5.073568 | 1.257074  | 0.253520  |
| H | -5.592220 | 2.115438  | 0.694632  |
| C | -3.977040 | 0.715767  | 0.923163  |
| C | -3.522218 | 1.310594  | 2.223157  |
| H | -4.151860 | 2.164339  | 2.510455  |
| H | -2.480072 | 1.668075  | 2.164025  |
| H | -3.556078 | 0.577499  | 3.045112  |
| C | -3.096878 | -2.143020 | -1.480695 |
| H | -2.210971 | -1.846027 | -2.067786 |
| H | -3.789320 | -2.656452 | -2.162840 |
| H | -2.761908 | -2.870076 | -0.723685 |
| C | -6.734933 | 1.311212  | -1.634974 |
| H | -6.764612 | 2.406669  | -1.533642 |
| H | -7.664123 | 0.922196  | -1.185441 |
| H | -6.759730 | 1.060941  | -2.705296 |
| C | 1.670086  | -1.520533 | 0.579510  |
| C | 1.960485  | -2.275503 | -0.580435 |
| C | 3.271735  | -2.292594 | -1.054846 |
| H | 3.500161  | -2.887203 | -1.947288 |
| C | 4.302758  | -1.590708 | -0.423845 |
| C | 3.998038  | -0.886890 | 0.739902  |
| H | 4.798192  | -0.358495 | 1.272822  |
| C | 2.705124  | -0.866834 | 1.272177  |
| C | 0.905263  | -3.080236 | -1.278804 |
| H | 0.309452  | -3.673427 | -0.565755 |
| H | 1.358160  | -3.774192 | -2.000939 |
| H | 0.202863  | -2.431290 | -1.828462 |
| C | 5.694189  | -1.628550 | -0.978708 |
| H | 6.105874  | -2.650562 | -0.945320 |
| H | 6.380026  | -0.976976 | -0.417126 |
| H | 5.716408  | -1.321216 | -2.038372 |
| C | 2.478481  | -0.197956 | 2.596699  |
| H | 1.447729  | 0.161528  | 2.730883  |
| H | 3.175192  | 0.643048  | 2.746461  |
| H | 2.663231  | -0.904833 | 3.424543  |
| C | 1.082769  | 1.290369  | -0.482129 |
| C | 3.109712  | 2.180996  | -0.719514 |
| C | 2.579009  | 2.661046  | 0.449184  |
| C | 2.355705  | 0.692103  | -2.576603 |
| H | 1.449929  | 0.133132  | -2.835529 |
| H | 3.217990  | 0.014543  | -2.503158 |

|   |           |           |           |
|---|-----------|-----------|-----------|
| H | 2.545941  | 1.462373  | -3.337204 |
| C | 4.431826  | 2.401032  | -1.345689 |
| H | 4.998075  | 1.456323  | -1.409761 |
| H | 5.025537  | 3.109488  | -0.753696 |
| H | 4.342724  | 2.808576  | -2.365036 |
| C | 3.138674  | 3.601752  | 1.446642  |
| H | 2.490806  | 4.481683  | 1.586959  |
| H | 4.120669  | 3.964170  | 1.115758  |
| H | 3.276581  | 3.125472  | 2.431678  |
| C | 0.387973  | 2.402395  | 1.648124  |
| H | -0.259213 | 3.244269  | 1.362992  |
| H | 0.956921  | 2.656440  | 2.550678  |
| H | -0.235463 | 1.524154  | 1.860149  |
| O | -0.461124 | -0.246025 | -2.183979 |
| O | -1.443197 | 1.655869  | -0.596500 |
| H | -2.390247 | 1.408071  | -0.570901 |

|                                              |                             |
|----------------------------------------------|-----------------------------|
| Zero-point correction=                       | 0.619392 (Hartree/Particle) |
| Thermal correction to Energy=                | 0.657020                    |
| Thermal correction to Enthalpy=              | 0.657965                    |
| Thermal correction to Gibbs Free Energy=     | 0.551974                    |
| Sum of electronic and zero-point Energies=   | -1803.714181                |
| Sum of electronic and thermal Energies=      | -1803.676553                |
| Sum of electronic and thermal Enthalpies=    | -1803.675609                |
| Sum of electronic and thermal Free Energies= | -1803.781599                |

## References

- 1 D. Dhara, P. Kalita, S. Mondal, R. S. Narayanan, K. R. Mote, V. Huch, M. Zimmer, C. B. Yildiz, D. Scheschkewitz, V. Chandrasekhar and A. Jana, *Chem. Sci.*, 2018, **9**, 4235–4243.
- 2 Rigaku Oxford Diffraction (**2015**). CrysAlis PRO. Rigaku Oxford Diffraction, Yarnton, England.
- 3 G. M. Sheldrick, *Acta Cryst. A*, 2015, **71**, 3–8.
- 4 G. M. Sheldrick, *Acta Cryst. C*, 2015, **71**, 3–8.
- 5 O. V. Dolomanov, L. J. Bourhis, R. J. Gildea, J. A. K. Howard and H. Puschmann, *J. Appl. Cryst.*, 2009, **42**, 339–341.
- 6 Bradenburg, K. Diamond, version 3.2k; *Crystal Impact GbR*: Bonn, Germany, 2015.
- 7 S. Stoll and A. Schweiger, *J. Magn. Reson.*, 2006, **178**, 42–55.
- 8 Y. Zhao and D. G. Truhlar, *Theor. Chem. Acc.*, 2008, **120**, 215–241.
- 9 Gaussian 16, Revision A.03, M. J. Frisch, G. W. Trucks, H. B. Schlegel, G. E. Scuseria; M. A. Robb; J. R. Cheeseman, G. Scalmani, V. Barone, G. A. Petersson, H. Nakatsuji, X. Li, M. Caricato, A. V. Marenich, J. Bloino, B. G. Janesko, R. Gomperts, B. Mennucci, H. P. Hratchian, J. V. Ortiz, A. F. Izmaylov, J. L. Williams; F. Ding; F. Lipparini, F. Egidi, J. Goings, B. Peng, A. Petrone, T. Henderson, D. Ranasinghe, V. G. Zakrzewski, J. Gao, N. Rega, G. Zheng, W. Liang, M. Hada, M. Ehara, K. Toyota, R. Fukuda, J. Hasegawa, M. Ishida, T. Nakajima, Y. Honda, O. Kitao, H. Nakai, T. Vreven, K. Throssell, J. A. Montgomery Jr., J. E. Peralta, F. Ogliaro, M. J. Bearpark, J. J. Heyd, E. N. Brothers, K. N. Kudin, V. N. Staroverov, T. A. Keith, R. Kobayashi, J. Normand, K. Raghavachari, A. P. Rendell, J. C. Burant, S. S. Iyengar, J. Tomasi, M. Cossi, J. M. Millam, M. Klene, C. Adamo, R. Cammi, J. W. Ochterski, R. L. Martin, K. Morokuma, O. Farkas, J. B. Foresman and D. J. Fox, Gaussian, Inc., Wallingford CT, 2016.
- 10 GaussView, Version 5, R. Dennington, T. A. Keith and J. M. Millam, Semichem Inc., Shawnee Mission, KS, **2009**.
- 11 A. D. Becke, *J. Chem. Phys.*, 1993, **93**, 5648–5652.
- 12 E. D. Glendening and F. Weinhold, *J. Comput. Chem.*, 1998, **19**, 593–609.
- 13 F. Weinhold and E. D. Glendening, *NBO 5.0 program manual: natural bond orbital analysis programs*, 2001.
- 14 M. J. Barca, C. Bertoni, L. Carrington, D. Datta, N. D. Silva, J. E. Deustua, D. G. Fedorov, J. R. Gour, A. O. Gunina, E. Guidez, T. Harville, S. Irle, J. Ivanic, K. Kowalski, S. S. Leang, H. Li, W. Li, J. J. Lutz, I. Magoulas, J. Mato, V. Mironov, H. Nakata, B. Q. Pham, P. Piecuch, D. Poole, S. R. Pruitt, A. P. Rendell, L. B. Roskop, K. Ruedenberg, T. Sattasathuchana, M. W. Schmidt, J. Shen, L. Slipchenko, M. Sosonkina, V. Sundriyal, A. Tiwari, J. L. G. Vallejo, B. Westheimer, M. Włoch, P. Xu, F. Zahariev and M. S. Gordon, *J. Chem. Phys.*, 2020, **152**, 154102(1)–154102(26).
